# Supplementary material for: Evidence for a non-canonical JAK/STAT signaling pathway in the synthesis of the brain’s major ion channels and neurotransmitter receptors
Source: PubMed Central journal article supplement (PMC6712773; doi:10.1186/s12864-019-6033-2), 2019-08-28
Supplement: 12864_2019_6033_MOESM1_ESM.pdf [file 12864_2019_6033_MOESM1_ESM.pdf]

A

| Relationship of Epilepsy Genes with JAK/STAT Inhibition |          |         |                                                    |                                                           |                          |
|---------------------------------------------------------|----------|---------|----------------------------------------------------|-----------------------------------------------------------|--------------------------|
| Gene of Interest                                        | FC V+B   | FC WP+B | Name                                               | Function                                                  | References               |
| GALR1                                                   | 34.36    | -115.70 | Galinin receptor 1                                 | Protective in Epilepsy                                    | Mazarati, 2004           |
| BHLHE22                                                 | -5.1     | 7.78    | Basic Helix Loop Helix E 22                        | Repressor involved in neurodevelopment                    | Joshi, 2008              |
| SOCS3                                                   | 2.89     | -3.29   | Suppressor of Cytokine Signaling 3                 | Inhibits JAK signaling, increased in epilepsy             | Pernot, 2011             |
| DRD5                                                    | 14.91    | -63.92  | Dopamine Receptor 5                                | Knockout protects from seizures                           | O'Sullivan, 2008         |
| INHBA                                                   | 5.26     | -5.27   | Inhibin Beta A                                     | Reduces excitotoxicity                                    | Lau, 2015                |
| NPTX1                                                   | 5.01     | -6.30   | Neuronal Pentraxin 1                               | Plays role in epileptogenic synaptic remodeling           | Sanabria, 2008           |
| GRIN2A                                                  | 2.18     | -8.80   | Glutamate Ionotropic Receptor NMDA Type Subunit 2A | Mutations cause epilepsy, involved in LTP                 | Carvill, 2013            |
| CXCR4                                                   | -1.53    | 1.77    | CXC Motif Chemokine Receptor 4                     | Inhibition protects against epilepsy                      | Song, 2016               |
| HRH3                                                    | -3.93    | 6.53    | Histamine H3 Receptor                              | Increased Histamine confers protection in epilepsy        | Bhowmik, 2012            |
| RGS4                                                    | 4.46     | -2.77   | Regulator of G protein signaling 4                 | Inhibition protects against epilepsy                      | Chen, 2012               |
| SH2D3C                                                  | -11.46   | 14.91   | SH2 Domain Containing 3C                           | Involved in cell migration                                | Wang, 2012               |
| ELAVL4                                                  | -2.04    | 2.76    | ELAV Like RNA Binding Protein 4                    | Controls mRNA processing, increased in Epilepsy models    | Bronicki, 2013           |
| FYN                                                     | 1.35     | NA      | FYN Proto-Oncogene, Src Family Tyrosine Kinase     | Overactivity leads to epilepsy, activates mTORC1 pathway  | Kojima, 1996; Wang, 2015 |
| RPS6K(A2, A3, A5, A6, B1, B2)                           | A2--2.04 | A2-2.59 | Ribosomal Protein S6 Kinase                        | mTOR activated, involved in proliferation and cell growth | Cho, 2011                |
| ARC                                                     | 33.24    | -15.04  | Activity Regulated Cytoskeleton Associated Protein | Known to be seizure and BDNF induced, plasticity          | Kulpers, 2016            |
| BDNF                                                    | 3.23     | -2.90   | Brain Derived Neurotrophic Factor                  | Increased in epilepsy, neuroplasticity                    | Binder, 2001             |
| JAK2                                                    | 1.79     | -2.11   | Janus Kinase 2                                     | Activated by BDNF and Status Epil.                        | Lund, 2008               |
| EGR3                                                    | 5.57     | -6.08   | Early Growth Response 3                            | Regulates $\alpha 4$ subunit GABA <sub>A</sub> R          | Roberts et al, 2006      |
