# Supplementary material for: Evidence for a non-canonical JAK/STAT signaling pathway in the synthesis of the brain’s major ion channels and neurotransmitter receptors
Source: PubMed Central journal article supplement (PMC6712773; doi:10.1186/s12864-019-6033-2), 2019-08-28
Supplement: 12864_2019_6033_MOESM2_ESM.pdf [file 12864_2019_6033_MOESM2_ESM.pdf]

A

| TOP 10 Neurological diseases:<br>V+B vs. CTRL |          |
|-----------------------------------------------|----------|
| Disease                                       | P-value  |
| Seizure disorder                              | 3.29E-27 |
| Seizures                                      | 6.75E-27 |
| Epileptic seizure                             | 7.44E-26 |
| Epilepsy                                      | 2.91E-24 |
| Neurological signs                            | 1.55E-16 |
| Dyskinesia                                    | 1.57E-14 |
| Motor dysfunction or movement disorder        | 3.75E-14 |
| Abnormal morphology of nervous system         | 5.14E-14 |
| Movement Disorders                            | 6.48E-14 |
| Huntington's Disease                          | 1.17E-12 |

B

| TOP 10 Neurological diseases:<br>WP+B/RX2+B reversal of BDNF |          |
|--------------------------------------------------------------|----------|
| Disease                                                      | P-value  |
| Epileptic seizure                                            | 7.32E-23 |
| Seizures                                                     | 3.82E-22 |
| Epilepsy                                                     | 7.57E-22 |
| Seizure disorder                                             | 1.24E-21 |
| Neurological signs                                           | 8.91E-13 |
| Motor dysfunction or movement disorder                       | 2.12E-11 |
| Movement Disorders                                           | 5.01E-11 |
| Dyskinesia                                                   | 1.67E-10 |
| Huntington's Disease                                         | 6.53E-10 |
| Abnormal morphology of nervous system                        | 9.99E-10 |
