# Supplementary material for: Evidence for a non-canonical JAK/STAT signaling pathway in the synthesis of the brain’s major ion channels and neurotransmitter receptors
Source: PubMed Central journal article supplement (PMC6712773; doi:10.1186/s12864-019-6033-2), 2019-08-28

A

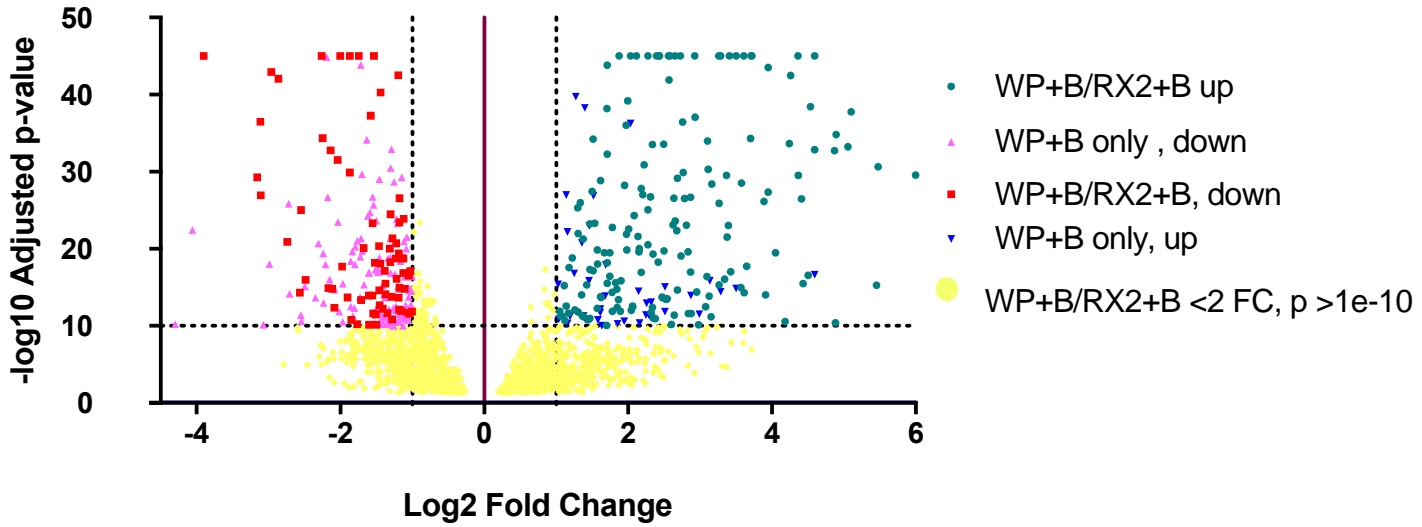

Supplement: 12864_2019_6033_MOESM3_ESM.pdf [file 12864_2019_6033_MOESM3_ESM.pdf]
