# Supplementary material for: Evidence for a non-canonical JAK/STAT signaling pathway in the synthesis of the brain’s major ion channels and neurotransmitter receptors
Source: PubMed Central journal article supplement (PMC6712773; doi:10.1186/s12864-019-6033-2), 2019-08-28
Supplement: 12864_2019_6033_MOESM5_ESM.pdf [file 12864_2019_6033_MOESM5_ESM.pdf]

**V+B v CTRL LIST**

| Gene Symbol | log2FC_db_dw | pAdj_db_dw | Aliases                     | Entrez ID |
|-------------|--------------|------------|-----------------------------|-----------|
| SH2D3C      | -3.5186608   | 0          | Nsp3                        | 362111    |
| TXNIP       | -2.0627642   | 0          | Vdup1                       | 117514    |
| KLF11       | -2.0083106   | 0          | Tcfcp2l2                    | 313994    |
| CCNG2       | -1.8418735   | 0          |                             | 29157     |
| HECTD2      | 1.6576949    | 0          |                             | 309514    |
| BAIAP2      | 1.6914603    | 0          | Irsp53                      | 117542    |
| ARHGEF3     | 1.8163428    | 0          |                             | 290541    |
| TPBG        | 1.8295311    | 0          | 5T4 WAIF1                   | 83684     |
| PDP1        | 1.8499978    | 0          | Ppm2c                       | 54705     |
| THRB        | 1.9880408    | 0          | C-erba-beta ERBA2 Nr1a2 R   | 24831     |
| NEFL        | 2.0243213    | 0          | NF-L Nfl                    | 83613     |
| SRXN1       | 2.0964212    | 0          | Ab2-390 Npn3                | 296271    |
| SDC1        | 2.1574545    | 0          | HSPG SYNDECA Synd1 Synd     | 25216     |
| RGS4        | 2.158761     | 0          |                             | 29480     |
| BAG3        | 2.1794496    | 0          |                             | 293524    |
| SPRY4       | 2.1836648    | 0          |                             | 291610    |
| SMTN        | 2.207883     | 0          |                             | 289734    |
| MAS1        | 2.4278078    | 0          | Mgra c-mas                  | 25153     |
| GFRA1       | 2.4593477    | 0          |                             | 25454     |
| DUSP6       | 2.5314097    | 0          | Mkp3                        | 116663    |
| SCN1B       | 2.5327137    | 0          |                             | 29686     |
| KLF10       | 2.5528164    | 0          | Tieg                        | 81813     |
| GYPC        | 2.6156454    | 0          | GPC                         | 364837    |
| SMPDL3B     | 2.759265     | 0          |                             | 362619    |
| PDGFB       | 2.8178334    | 0          | SIS c-sis                   | 24628     |
| DUSP5       | 2.8205106    | 0          | Cpg21                       | 171109    |
| GADD45B     | 2.8589942    | 0          |                             | 299626    |
| SCG2        | 2.8881552    | 0          | Chcg                        | 24765     |
| LPAR1       | 2.9599757    | 0          | Edg2                        | 116744    |
| GRASP       | 2.962261     | 0          |                             | 192254    |
| HAUS8       | 2.999679     | 0          | Ny-sar-48 RGD1311565        | 290626    |
| EGR1        | 3.0695915    | 0          | Krox-24 NGFI-A Ngf1 Ngfi zi | 24330     |
| ECEL1       | 3.1382005    | 0          | Dine                        | 60417     |
| LAMP5       | 3.2535648    | 0          | BAD-LAMP LAMP-5 RGD130      | 362220    |
| GPR158      | 3.32403      | 0          |                             | 291352    |
| RASL11A     | 3.382681     | 0          |                             | 304268    |
| STX11       | 3.3982918    | 0          |                             | 292483    |
| TRPC6       | 3.5656304    | 0          | Trrp6                       | 89823     |
| NPTX2       | 3.5869105    | 0          | NP-II NP2 Narp              | 288475    |
| ANKRD33B    | 3.6229866    | 0          | RGD1564227                  | 310200    |
| FOSB        | 3.7941096    | 0          | fra-2                       | 100360880 |

|         |            |                                      |        |
|---------|------------|--------------------------------------|--------|
| CYP26B1 | 3.9069061  | 0                                    | 312495 |
| EGR2    | 4.0791073  | 0 Krox20                             | 114090 |
| FAM150B | 4.0822096  | 0                                    | 679566 |
| VGf     | 4.137181   | 0                                    | 29461  |
| EMP1    | 4.1743793  | 0 CL-20 EMP-1 ENP1MR TMP             | 25314  |
| HSF2BP  | 4.194514   | 0 RGD1565879                         | 499413 |
| SIM1    | 4.295678   | 0                                    | 309888 |
| RRAD    | 4.5104423  | 0                                    | 83521  |
| PLAUR   | 4.754548   | 0 Par Plaur3 uPAR uPAR-2 uP          | 50692  |
| ARC     | 5.054995   | 0 rg3.1                              | 54323  |
| GALR1   | 5.1025863  | 0 Galnr1                             | 50577  |
| MMP3    | 5.109894   | 0                                    | 171045 |
| MMP13   | 5.2357397  | 0                                    | 171052 |
| GPRC5A  | 5.4281096  | 0 Rai3                               | 312790 |
| CITED2  | 2.067604   | 1.40E-45 Mrg1                        | 114490 |
| PRSS23  | 2.4334733  | 2.80E-45                             | 308807 |
| CCKBR   | 2.7934568  | 2.80E-45 Cck2r Cholrec               | 25706  |
| CSRNP1  | 2.6077116  | 3.20E-44 Axud1                       | 363165 |
| GALNT9  | 1.649546   | 7.40E-44                             | 304571 |
| PENK    | 3.258971   | 7.60E-44 Enk Penk-rs Penk1 Penk2     | 29237  |
| SPRR1A  | 4.405632   | 1.18E-43 Spr Spr1a Sprr Sprr1 Sprr1a | 499660 |
| NPTX1   | 2.3235111  | 1.19E-43                             | 266777 |
| SSTR3   | 3.0217788  | 1.51E-43 SSTR Smstr28                | 171044 |
| HOMER1  | 1.6634928  | 5.16E-43 HOMER1F Vesl-1              | 29546  |
| NAB2    | 1.9878603  | 6.96E-43                             | 314910 |
| ALOXE3  | 2.4174693  | 2.52E-42 e-LOX-3 eLOX-3              | 287424 |
| SERTAD1 | 2.2239814  | 2.65E-42                             | 361526 |
| GPR68   | 2.5399456  | 2.66E-41                             | 314386 |
| EGR4    | 3.1501546  | 4.21E-41 Egr4 l NGFI-C               | 25129  |
| LBH     | 1.3661401  | 6.01E-41                             | 683626 |
| DAAM1   | -1.1606426 | 7.91E-41                             | 314212 |
| RT1-S3  | 2.45826    | 5.13E-40 H2-T23 RT-BM1 RT1-BM1 R     | 294228 |
| SSTR4   | 2.0445876  | 6.55E-40 Smstr4                      | 25555  |
| PCDH8   | 1.7111181  | 8.03E-40 Arcadlin                    | 64865  |
| PTAFR   | 3.4609513  | 1.20E-39                             | 58949  |
| PLCL1   | 1.8863832  | 2.60E-39                             | 84587  |
| DHRS9   | 3.8141215  | 4.01E-38 Rdhl                        | 170635 |
| SLCO2A1 | 3.8286128  | 1.77E-37 Matr1 Slc21a2               | 24546  |
| KLF9    | 1.8472241  | 4.20E-36 Bteb Bteb1                  | 117560 |
| VASP    | 1.8119922  | 7.63E-36                             | 361517 |
| ISM1    | 3.1125116  | 8.86E-36 RGD1562551                  | 311760 |
| OSBP2   | 1.3585519  | 9.21E-36 RGD1309479                  | 305475 |
| MEIS2   | 1.2149252  | 1.08E-35                             | 311311 |

|         |            |          |                             |        |
|---------|------------|----------|-----------------------------|--------|
| MYT1L   | -1.253483  | 1.69E-35 | Nzf-1 Nzf1 Nztf1            | 116668 |
| FAM110C | 3.6874802  | 2.14E-35 |                             | 500638 |
| MAN1A1  | 2.551768   | 2.79E-35 | Aa2-166 Man1a               | 294410 |
| IRS2    | 1.6023843  | 3.76E-35 | 4PS IRS-2                   | 29376  |
| SPRY2   | 1.3205673  | 4.32E-35 |                             | 306141 |
| SPHK1   | 3.0671668  | 6.52E-35 |                             | 170897 |
| AREG    | 3.6564286  | 1.21E-34 |                             | 29183  |
| RDH10   | 1.7078578  | 1.30E-34 |                             | 353252 |
| GCNT1   | 3.2552552  | 2.13E-34 | core 2 GlcNAc-T             | 64043  |
| MYCL    | -2.4887106 | 6.92E-34 | Lmyc1 Mycl1                 | 298506 |
| DUSP4   | 2.4186413  | 1.97E-33 | Mkp-2 Mkp2                  | 60587  |
| INHBA   | 2.3958855  | 2.04E-33 |                             | 29200  |
| ADCY8   | 1.7645378  | 4.52E-33 | Ac8                         | 29241  |
| KCNJ4   | 1.2723438  | 5.24E-33 | Hirk2                       | 116649 |
| PDXK    | 2.2978668  | 1.10E-32 |                             | 83578  |
| SCN2A   | -1.0416238 | 4.14E-32 | NachII Nav1.2 RII/RIIA RNSC | 24766  |
| LMNA    | 1.6316702  | 4.87E-32 |                             | 60374  |
| PRIMA1  | 3.1429088  | 9.42E-32 | PRiMA Prima1l               | 690195 |
| KCNA1   | 2.5377295  | 1.93E-31 | Kcna Kcpvd Kv1.1            | 24520  |
| IFRD1   | 1.5897458  | 3.00E-31 | Pc4                         | 29596  |
| IER5    | 1.8107331  | 4.45E-31 |                             | 498256 |
| TRIB2   | 1.0827541  | 5.40E-31 | RGD1564451                  | 313974 |
| SMAGP   | 2.7230294  | 5.71E-31 |                             | 300236 |
| DRD5    | 3.8985677  | 7.07E-31 | D1B                         | 25195  |
| IL6R    | 2.301657   | 1.60E-30 | IL6R1 Il6ra                 | 24499  |
| FAM84A  | 1.5672331  | 1.86E-30 | RGD1305779                  | 313969 |
| INSC    | 3.1004944  | 1.88E-30 | RGD1311379                  | 293166 |
| CYP27B1 | 2.0879796  | 3.07E-30 | Cyp40                       | 114700 |
| GAL     | 3.638903   | 4.39E-30 | Galn                        | 29141  |
| ITGA6   | 1.8318036  | 4.59E-30 |                             | 114517 |
| PIK3IP1 | -1.2761761 | 5.60E-30 | RGD1311203 zgc:66482        | 305472 |
| NPL     | 1.8066884  | 9.61E-30 |                             | 304860 |
| HS3ST5  | 1.6394793  | 1.43E-29 |                             | 294449 |
| ACAN    | 2.3603435  | 1.89E-29 | Agc Agc1                    | 58968  |
| FST     | -2.2953715 | 3.23E-29 | FOL1 FS Fst-288 RATFOL1     | 24373  |
| FRMD6   | 1.591484   | 3.23E-29 |                             | 257646 |
| CRHBP   | 2.8745425  | 1.69E-28 | Crfbp                       | 29625  |
| GEM     | 2.114901   | 2.35E-28 |                             | 297902 |
| FOS     | 1.8276407  | 3.46E-28 | c-fos                       | 314322 |
| FGFR1   | 1.739113   | 1.00E-27 |                             | 79114  |
| NRN1    | 2.0853286  | 1.11E-27 | Nrn                         | 83834  |
| EHD4    | 1.4695604  | 1.22E-27 | Past2                       | 192204 |
| C1QL3   | 1.7291608  | 1.40E-27 |                             | 680404 |

|          |            |                                    |        |
|----------|------------|------------------------------------|--------|
| PRICKLE1 | 1.6093031  | 2.63E-27 Rilp                      | 315259 |
| MTUS2    | -1.7557187 | 1.02E-26 RGD1562533                | 498136 |
| ADORA1   | 1.7060324  | 1.44E-26                           | 29290  |
| C1QL2    | 3.2518566  | 1.46E-26                           | 288979 |
| LEXM     | 2.7456307  | 1.92E-26 RGD1559493                | 500516 |
| BHLHE22  | -2.3506196 | 2.87E-26 Bhlhb5                    | 365748 |
| RGS16    | 1.710074   | 3.55E-26                           | 360857 |
| CXXC5    | 1.1755618  | 4.92E-26                           | 291670 |
| ARID5A   | 1.7327574  | 7.22E-26                           | 316327 |
| PTPRR    | -1.9995065 | 1.02E-25 PC12-PTP1 Pcctp1 R-PTP-R  | 94202  |
| ADRA1D   | 2.8663747  | 1.21E-25 Adrd1                     | 29413  |
| SEMA3A   | 2.0394833  | 1.24E-25                           | 29751  |
| DUSP14   | 1.8628569  | 1.29E-25 Dusp14l2                  | 360580 |
| BHLHE40  | 1.5580747  | 1.70E-25 Bhlhb2 Dec1 SHARP-2 Sharq | 79431  |
| TBX21    | 3.676611   | 2.03E-25                           | 303496 |
| SP7      | 3.4122097  | 4.62E-25 Osx                       | 300260 |
| TMEM150C | -1.1294942 | 5.69E-25 RGD1306105                | 360916 |
| PLCXD2   | -1.1535157 | 7.99E-25 RGD1563504                | 363781 |
| HTR1B    | 2.5193267  | 8.85E-25                           | 25075  |
| CCND1    | 1.4953775  | 1.45E-24                           | 58919  |
| PTGS2    | 2.4685276  | 2.83E-24 COX-2 Cox2                | 29527  |
| TMEM65   | 1.164343   | 6.48E-24 RGD1563224                | 500874 |
| RASSF8   | 2.6404998  | 6.48E-24 RGD1308820                | 312846 |
| MTMR12   | 1.8788508  | 1.05E-23 Pip3ap                    | 310155 |
| CNGA4    | 3.2149022  | 1.55E-23 Cgn2 rOCNC2               | 85258  |
| RTN4RL1  | 1.703219   | 3.08E-23 Ngrh2                     | 303311 |
| MMP10    | 3.6014867  | 3.49E-23                           | 117061 |
| MMP9     | 3.1567497  | 4.16E-23                           | 81687  |
| FAM102B  | 1.0435205  | 5.39E-23 RGD1310037                | 365903 |
| RNF217   | 1.0695094  | 7.63E-23 lbrdc1                    | 292188 |
| ZYX      | 1.2675476  | 1.46E-22                           | 114636 |
| TRIB1    | 1.8991559  | 2.54E-22 Gig2                      | 78969  |
| GPAT3    | 1.9999765  | 2.57E-22 Agpat9                    | 305166 |
| MYO1E    | 1.7415842  | 3.58E-22 MYR5 Myr3                 | 25484  |
| SERPINB2 | 3.5841072  | 5.20E-22 Pai2a                     | 60325  |
| DBNDD1   | -1.8708739 | 1.08E-21 RGD1310008                | 361437 |
| B3GNT7   | -1.2929933 | 1.67E-21                           | 316583 |
| SORBS2   | 1.1322527  | 1.91E-21 Argbp2                    | 114901 |
| DOK5     | 1.6272763  | 3.00E-21 RGD1562846                | 502694 |
| HSPH1    | 1.0666467  | 4.02E-21 Hsp105                    | 288444 |
| ATG16L1  | 1.066054   | 5.70E-21 Apg16l Wdr30              | 363278 |
| DLGAP2   | 2.4980152  | 6.56E-21 DAP-2 SAPAP2              | 116681 |
| DCLK3    | -2.5603716 | 7.79E-21 Dcamk3 RGD1309232         | 316023 |

|            |            |                                   |           |
|------------|------------|-----------------------------------|-----------|
| RUNX2      | 2.8620102  | 2.15E-20 Cbfa1 OSF-2              | 367218    |
| HMGA1      | 1.9424802  | 2.52E-20 Hmgi Hmgiy               | 117062    |
| ZC2HC1A    | -1.018401  | 2.60E-20 Fam164a RGD1311970       | 310244    |
| CAV1       | 1.5572658  | 2.61E-20 Cav                      | 25404     |
| EFR3A      | 1.0692867  | 2.68E-20 RGD1305976               | 362923    |
| RGS20      | 1.2998077  | 3.26E-20                          | 362477    |
| PTH2R      | 2.567532   | 4.37E-20 Pthr2                    | 81753     |
| KCNV1      | 1.3596368  | 4.89E-20 Kv8.1                    | 60326     |
| GPR83      | 2.9704585  | 8.92E-20 Gir                      | 140595    |
| ERRFI1     | 1.1447444  | 9.01E-20 RGD1307599 Ralt Xxx gene | 313729    |
| IER5L      | 1.5424821  | 1.11E-19                          | 499772    |
| NEDD9      | 1.1884135  | 1.48E-19                          | 291044    |
| WDR43      | 0.78759044 | 1.99E-19                          | 362703    |
| BAALC      | 1.0558892  | 2.48E-19                          | 140720    |
| DKK2       | 3.33558    | 3.13E-19 Dkk4                     | 295445    |
| MAP2K6     | -1.2294734 | 3.97E-19 Mkk6                     | 114495    |
| AP1S3      | 1.6560899  | 4.60E-19                          | 367304    |
| PLK2       | 1.2168903  | 4.68E-19 Snk                      | 83722     |
| FAM212B    | 1.5589373  | 5.27E-19 RGD1306526               | 310764    |
| FAM196A    | 1.2841877  | 5.33E-19                          | 100233213 |
| DNAJB5     | 1.018804   | 6.05E-19                          | 313811    |
| SELE       | 2.8674822  | 6.41E-19                          | 25544     |
| 42805      | 1.4264649  | 6.69E-19 MARCH-XI RGD1559945      | 499558    |
| VIPR1      | 1.814615   | 9.38E-19 PACAP-R-2 PACAP-R2 RATVA | 24875     |
| PTPRU      | 0.9018883  | 9.45E-19                          | 116680    |
| GCGR       | 2.2198486  | 9.56E-19                          | 24953     |
| BAZ1A      | 1.8905354  | 1.21E-18                          | 314126    |
| KITLG      | 1.0291016  | 1.52E-18 Kitl Mgf SCF             | 60427     |
| POU4F3     | 2.8643954  | 3.79E-18                          | 364855    |
| SS18       | 0.89652956 | 4.13E-18                          | 361295    |
| ARHGAP10   | 1.32641    | 4.25E-18                          | 688429    |
| RGD1307461 | -1.6390955 | 6.60E-18                          | 300990    |
| SYT10      | 2.6374457  | 7.16E-18                          | 60567     |
| ATP2B1     | 0.7975083  | 7.42E-18 Pmca1a Pmca1b Pmca1c     | 29598     |
| EGR3       | 2.477239   | 1.16E-17                          | 25148     |
| TMOD1      | 1.247792   | 1.25E-17 E-Tmod Tmod              | 25566     |
| BDNF       | 1.6924942  | 1.46E-17                          | 24225     |
| CDKN1A     | 1.5740019  | 1.68E-17 Cip1 UV96 Waf1           | 114851    |
| PCSK1      | 1.3431313  | 1.73E-17 BDP PC1 PC3              | 25204     |
| AJAP1      | 1.2560861  | 2.15E-17 neumo48                  | 687031    |
| PPP1R18    | -0.9783594 | 2.15E-17 Kiaa1949 RGD1309543      | 361790    |
| SHC4       | 2.0069253  | 4.60E-17 RGD1309182               | 679845    |
| KLHDC8A    | -1.9683065 | 5.18E-17 RGD1305132               | 305096    |

|            |             |                                  |        |
|------------|-------------|----------------------------------|--------|
| CARS       | 0.8850533   | 6.37E-17                         | 293638 |
| PDE9A      | 1.5808959   | 9.09E-17                         | 191569 |
| VEGFA      | 1.445269    | 9.35E-17 VEGF-A VEGF164 VPF Vegf | 83785  |
| CSPG4      | 1.0248827   | 1.00E-16 Ng2                     | 81651  |
| HACE1      | 1.0541575   | 1.18E-16                         | 361866 |
| ELOVL7     | 2.0444527   | 1.19E-16                         | 361895 |
| DNAJB4     | -0.92410535 | 1.29E-16                         | 295549 |
| ADRA1B     | 1.8079491   | 1.36E-16                         | 24173  |
| RBMS1      | 1.556421    | 2.05E-16                         | 362138 |
| MYBPH      | 1.4676771   | 3.00E-16                         | 83708  |
| TRIM9      | 1.334747    | 4.48E-16                         | 155812 |
| PIK3CD     | -1.2090521  | 4.90E-16                         | 366508 |
| RGD1563365 | 1.0237044   | 4.90E-16                         | 299700 |
| VCL        | 1.0615209   | 7.73E-16                         | 305679 |
| PNMA2      | -0.8894666  | 8.17E-16                         | 305977 |
| WDR1       | 0.78475046  | 8.63E-16                         | 360950 |
| PLEKHH2    | 1.9632562   | 8.70E-16 RGD1304935              | 313866 |
| CCPG1      | -0.99297786 | 9.71E-16                         | 363098 |
| CREM       | 1.5828385   | 1.21E-15 Icer                    | 25620  |
| PRAGMIN    | 1.5849367   | 1.32E-15 RGD1311793              | 306506 |
| SIK1       | 1.9205624   | 1.63E-15 Sik Snf1lk              | 59329  |
| KCNK2      | -1.6440685  | 1.99E-15 Trek-1 rTREK1d          | 170899 |
| MAP2K3     | 1.8152273   | 2.12E-15 Mek3 Mkk3               | 303200 |
| UBASH3B    | 1.6640985   | 2.29E-15 RGD1310357 Sts-1        | 315579 |
| SIAH3      | 2.1123347   | 3.02E-15                         | 692004 |
| FAM184B    | -1.8618681  | 3.59E-15 RGD1564950              | 289671 |
| RBM12      | 1.0843652   | 3.59E-15                         | 652928 |
| PVR        | 1.6094185   | 3.95E-15 Taa1 Tage4              | 25066  |
| ADCK3      | -1.4241498  | 4.09E-15 Cabc1                   | 360887 |
| HSPA4L     | 1.0953513   | 4.81E-15 APG-1 OSP94             | 294993 |
| NGF        | 2.332491    | 5.61E-15 Ngfb beta-NGF           | 310738 |
| AGTR1A     | 1.9648544   | 5.98E-15 AT1 AT1A AT1R Agtr1     | 24180  |
| SLC6A17    | 1.475906    | 6.02E-15 Ntt4                    | 613226 |
| EIF2AK3    | 0.8770304   | 6.95E-15 PEK                     | 29702  |
| CDC37L1    | 0.7691417   | 7.22E-15 Cdc37l                  | 293886 |
| TIMP1      | 1.1849104   | 7.35E-15 TIMP-1 Timp             | 116510 |
| PANX1      | 1.0717888   | 8.85E-15 px1                     | 315435 |
| FAM43A     | 1.5121964   | 9.13E-15 RGD1304790              | 288031 |
| ACVR1      | 0.99055094  | 1.10E-14                         | 79558  |
| DDHD1      | 0.7036751   | 1.13E-14                         | 305816 |
| FGF2       | 2.3530617   | 1.22E-14 Fgf-2 bFGF              | 54250  |
| GREM1      | 1.2579631   | 1.38E-14 Cktsf1b1 drm            | 50566  |
| ZMIZ1      | 1.3394367   | 1.43E-14 Rai17                   | 361103 |

|            |             |                         |        |
|------------|-------------|-------------------------|--------|
| FGF9       | 1.2275751   | 1.46E-14                | 25444  |
| KLF14      | 2.2850194   | 1.77E-14                | 312203 |
| RGD1305014 | 0.9552032   | 2.23E-14                | 309029 |
| RTN4RL2    | 1.2922189   | 2.29E-14 Ngrh1          | 311169 |
| ETV5       | 1.6104954   | 2.42E-14                | 303828 |
| ST7        | 0.9344929   | 2.79E-14                | 296911 |
| ACTN1      | 1.5171064   | 2.86E-14                | 81634  |
| KLHDC8B    | -0.99473333 | 3.35E-14                | 306589 |
| GABRG2     | -1.2529383  | 4.04E-14                | 29709  |
| HIC1       | 2.4993727   | 4.96E-14                | 303310 |
| ERCC1      | 1.079485    | 4.97E-14                | 292673 |
| MUSK       | 2.7192237   | 5.00E-14 Nsk1           | 81725  |
| SYPL2      | 2.1900775   | 5.78E-14 Mg29           | 362018 |
| BAI1       | 1.1931818   | 6.54E-14 Bai1           | 362931 |
| YPEL5      | -0.77750516 | 7.20E-14                | 298792 |
| JUN        | 0.8752457   | 7.57E-14                | 24516  |
| RRAGD      | -1.0506474  | 8.18E-14                | 297960 |
| PTPRN      | 1.0244571   | 8.32E-14 ICA512 Ia-2    | 116660 |
| LRRC26     | 2.4362385   | 9.51E-14 RGD1308398     | 311803 |
| ACSL4      | 0.82943016  | 1.20E-13 Acs4 FacI4     | 113976 |
| SCRT2      | 1.8648645   | 1.30E-13 RGD1564796     | 366229 |
| RPS6KA5    | -0.8596208  | 1.54E-13 Msk1           | 314384 |
| NARF       | -0.8929865  | 1.71E-13 RGD1310894     | 360681 |
| ANO4       | 1.349041    | 1.84E-13 Tmem16d        | 299714 |
| RAI14      | 0.94001484  | 1.88E-13                | 294804 |
| TRMT6      | 0.92291427  | 2.07E-13 RGD1308877     | 311441 |
| MYH4       | 2.5091531   | 2.37E-13                | 360543 |
| PPHLN1     | 0.81124485  | 2.77E-13                | 366975 |
| UOX        | 2.5953753   | 3.03E-13 UOX-2 Uri Uri2 | 114768 |
| MTSS1      | -0.67216885 | 3.26E-13                | 362918 |
| CACNG3     | 1.1780035   | 3.64E-13                | 140724 |
| FAM46A     | 2.0539212   | 3.71E-13 RGD1311381     | 300870 |
| HRH3       | -1.9751954  | 4.26E-13                | 85268  |
| FKBP5      | 0.8295817   | 4.26E-13                | 361810 |
| SYNJ2      | 1.9054892   | 4.92E-13                | 84018  |
| DLC1       | 2.12959     | 6.61E-13 Arhgap7 RhoGAP | 58834  |
| EHBP1L1    | -1.0739992  | 7.41E-13                | 309169 |
| TMTC4      | -1.059587   | 8.35E-13 RGD1560183     | 290501 |
| SSTR2      | 0.9105852   | 9.80E-13 Smstr2         | 54305  |
| UNG        | 0.9744515   | 1.04E-12                | 304577 |
| GPR37      | -1.4318073  | 1.08E-12 Ednrbl         | 117549 |
| STAM       | 0.6097905   | 1.26E-12 RGD1564499     | 498798 |
| JUNB       | 1.1255476   | 1.26E-12                | 24517  |

|            |             |          |                           |        |
|------------|-------------|----------|---------------------------|--------|
| NUB1       | -0.65661305 | 1.29E-12 | BS4 NYREN18               | 296731 |
| IGSF9      | -1.2876827  | 1.34E-12 |                           | 304982 |
| CALCA      | 2.0663934   | 1.53E-12 | CAL6 CGRP Cal1 Calc RATC/ | 24241  |
| TTPAL      | 1.0955765   | 1.56E-12 | RGD1305754                | 296349 |
| SIK3       | 1.1485419   | 1.63E-12 |                           | 684112 |
| NEFM       | 1.3457621   | 1.64E-12 | Nef3 Nfm                  | 24588  |
| DMP1       | 2.437485    | 2.08E-12 | DENTMAT                   | 25312  |
| PNMAL1     | -1.2880445  | 2.17E-12 | RGD1310803                | 361515 |
| LYVE1      | 2.454409    | 2.17E-12 | Xlkd1                     | 293186 |
| MRM1       | 0.79004884  | 2.17E-12 | RGD1566232                | 363661 |
| LYRM9      | -1.2623076  | 3.30E-12 | RGD1562012                | 497962 |
| CDC42EP4   | -0.9025045  | 3.30E-12 |                           | 303653 |
| RNF152     | -1.9679434  | 3.43E-12 |                           | 293561 |
| SLCO3A1    | 1.2057765   | 3.58E-12 | Slc21a11                  | 140915 |
| MICAL2     | 0.9951284   | 4.08E-12 | MICAL-2 RGD1311773        | 365352 |
| EPHA4      | -0.9142841  | 4.79E-12 | RGD1560587                | 316539 |
| HDAC11     | -0.90699375 | 4.79E-12 |                           | 297453 |
| RGD1305587 | -1.0728447  | 6.45E-12 |                           | 294499 |
| DPF3       | 1.2705431   | 6.45E-12 |                           | 299186 |
| SPRED3     | 1.4192659   | 6.57E-12 | RGD1311713                | 308478 |
| SYNPO      | 1.3086188   | 6.83E-12 |                           | 60324  |
| ZFP143     | 1.0058349   | 6.95E-12 | STAF Znf143               | 361627 |
| KCNF1      | 1.4807354   | 6.95E-12 | Kh1 Kv5.1                 | 298908 |
| HTR1F      | 2.439059    | 7.05E-12 | Htr1eb                    | 60448  |
| SESN1      | -0.86736435 | 7.19E-12 |                           | 294518 |
| EZR        | 1.0318053   | 7.50E-12 | Vil2                      | 54319  |
| ARVCF      | -0.6820622  | 9.00E-12 |                           | 303798 |
| EFNA4      | -1.4177372  | 1.06E-11 |                           | 310643 |
| P4HB       | 0.5871119   | 1.10E-11 | PDI PDIR                  | 25506  |
| IFFO2      | 1.2169538   | 1.11E-11 |                           | 641315 |
| VSTM2B     | 1.2963742   | 1.25E-11 | RGD1306235                | 361560 |
| KCNC4      | 1.3986031   | 1.34E-11 |                           | 684516 |
| RPS6KA2    | -1.0282438  | 1.41E-11 |                           | 117269 |
| RGD1561849 | 1.280649    | 1.50E-11 |                           | 500393 |
| VWA1       | -1.4944415  | 1.56E-11 | RGD1311476                | 298683 |
| MCM3       | 0.88786876  | 1.83E-11 |                           | 316273 |
| RGD1304810 | 1.324045    | 1.96E-11 |                           | 306504 |
| WSCD1      | 0.8512739   | 2.08E-11 | RGD1308212                | 287466 |
| TSPAN5     | 0.97393215  | 2.12E-11 | Tm4sf9 Tspan-5            | 362048 |
| MYC        | 0.7217986   | 2.57E-11 | RNCMYC c-myc mMyc         | 24577  |
| FLT1       | 2.370946    | 2.83E-11 | FLT-1 VEGFR-1             | 54251  |
| NPY1R      | -0.9346991  | 2.91E-11 | NPY-1                     | 29358  |
| CLMP       | -1.2245033  | 3.02E-11 | ACAM Asam OI16            | 286939 |



|           |             |                                     |           |
|-----------|-------------|-------------------------------------|-----------|
| GPR12     | -1.6918236  | 3.45E-11 Gpcr12                     | 80840     |
| AK1       | -0.9593049  | 3.91E-11 Ak 1                       | 24183     |
| SEMA6C    | -1.6502132  | 3.95E-11                            | 29744     |
| CXCL12    | 1.1677482   | 4.43E-11 Sdf1                       | 24772     |
| HECA      | 0.6286029   | 4.48E-11                            | 308624    |
| SLC22A3   | -1.5044653  | 4.74E-11                            | 29504     |
| EDNRA     | 1.3215874   | 4.97E-11 ET-A ET-AR Endor Eta RGD1  | 24326     |
| PCED1B    | -1.3029708  | 5.22E-11 Fam113b RGD1561028         | 315283    |
| GPR137C   | -1.3275257  | 5.98E-11 RGD1563070                 | 305812    |
| PIK3C3    | -0.86102486 | 6.10E-11                            | 65052     |
| FILIP1    | -1.8423249  | 6.32E-11 Filip                      | 246776    |
| IPPK      | 1.1657133   | 6.91E-11 C9orf12 RGD1311271 rlpk1   | 306808    |
| SLC9A2    | 1.4313039   | 7.30E-11 Nhe2                       | 24783     |
| HSH2D     | 2.2285504   | 7.33E-11                            | 100360518 |
| ABHD13    | 0.65878487  | 7.49E-11 RGD1308317                 | 306630    |
| KLHL29    | 0.87309074  | 7.65E-11 Kbtbd9                     | 298867    |
| ARMCX6    | -1.0612724  | 9.60E-11                            | 363496    |
| CYLD      | -0.87643355 | 9.95E-11 LRRGT00003 Rp1 Rp1h        | 312937    |
| STAC2     | 1.1889721   | 9.95E-11                            | 363674    |
| DIXDC1    | -0.8126806  | 1.38E-10 Ccd1                       | 363062    |
| GUCY1B3   | -0.68394923 | 1.40E-10 Gucy1b1 SGC                | 25202     |
| NGEF      | 0.7739159   | 1.50E-10 Besh3                      | 246217    |
| SLC4A11   | 1.8949499   | 1.59E-10                            | 311423    |
| LOC680663 | 1.8478743   | 1.69E-10                            | 680663    |
| RUNX1     | 2.1376946   | 1.70E-10 Aml1 B CBF-alpha-2 Cbfa2 I | 50662     |
| ZFP238    | -1.0958638  | 1.71E-10 Rp58 Zbtb18 Znf238         | 64619     |
| SLC43A2   | -0.6407087  | 1.72E-10 RGD1305819                 | 287532    |
| BCAR3     | 1.0566084   | 1.86E-10                            | 310838    |
| RND1      | -1.0471507  | 1.98E-10                            | 362993    |
| PEX       | 1.9048415   | 2.01E-10 PEX                        | 25512     |
| UNC5B     | 1.3878748   | 2.11E-10 Unc5h2                     | 60630     |
| GRWD1     | 0.9444853   | 2.14E-10                            | 308592    |
| LHFPL2    | 0.89294094  | 2.19E-10                            | 294643    |
| CDK17     | 0.75188833  | 2.35E-10 Pctaire2 Pctk2             | 314743    |
| MCHR1     | 1.4962466   | 2.37E-10 Gpr24 Mch-1r Slc1          | 83567     |
| CBLN2     | 1.2851559   | 2.71E-10                            | 291388    |
| UAP1      | 0.9331793   | 2.85E-10 RGD1561967                 | 498272    |
| HES6      | -0.73470825 | 3.25E-10                            | 316626    |
| SDCBP     | 0.6194749   | 3.28E-10 TACIP18 mda-9              | 83841     |
| CYGB      | -1.2168483  | 3.42E-10 Staap Stap                 | 170520    |
| ME1       | 0.57811105  | 3.42E-10 MOD1                       | 24552     |
| TMEM246   | -0.8830453  | 3.44E-10 RGD1307218                 | 362518    |
| ELMOD1    | -0.77389467 | 3.91E-10 RGD1564186                 | 315670    |

|          |             |                                |           |
|----------|-------------|--------------------------------|-----------|
| EML4     | 0.7334703   | 4.16E-10                       | 313861    |
| NRF1     | 0.98583704  | 5.41E-10 Nfe2l1_retired        | 312195    |
| RBM24    | -1.4161272  | 5.43E-10                       | 690139    |
| ZBTB46   | 1.3315436   | 5.43E-10 Btbd4                 | 311718    |
| POU4F2   | 2.4603977   | 5.44E-10 Brn3b                 | 171355    |
| SMAD3    | 1.0452014   | 6.06E-10 Madh3 Smad 3 mad3     | 25631     |
| CREBL2   | -0.84521633 | 7.53E-10                       | 362453    |
| TACR3    | 1.8273549   | 7.79E-10 Nkr Nmkr Tac3r        | 24808     |
| LIMK2    | -0.8737091  | 8.14E-10 Limk2b Link2          | 29524     |
| RAG1     | 2.31254     | 8.26E-10                       | 84600     |
| NDUFAF4  | 1.0272276   | 8.27E-10 Hrpap20               | 362495    |
| KCNN1    | -1.3946551  | 9.01E-10 KCa2.1                | 54261     |
| KRAS     | 1.1000634   | 9.01E-10 Kras2 c-Ki-ras p21    | 24525     |
| FMNL1    | 1.1394138   | 9.39E-10                       | 287746    |
| MAL2     | -0.8264061  | 1.04E-09                       | 362911    |
| PRSS12   | -0.833376   | 1.55E-09 Nt                    | 85266     |
| HBEGF    | 1.0555133   | 1.62E-09 Dtr GFHB Hb-egf Hegfl | 25433     |
| RASSF7   | -1.6510895  | 1.65E-09 RGD1306244            | 293623    |
| SLC25A37 | 1.4660352   | 1.76E-09 Mscp RGD1359361       | 306000    |
| LRRC61   | -0.8664268  | 1.81E-09 RGD1561800            | 500111    |
| SLITRK4  | -0.9375122  | 2.01E-09                       | 302473    |
| RAB3D    | -1.1076238  | 2.07E-09                       | 140665    |
| PSME3    | 0.65283084  | 2.24E-09 Ab2-371               | 287716    |
| GALNT7   | 1.2785124   | 2.26E-09                       | 29750     |
| LRRC71   | -0.78167814 | 2.38E-09 RGD1309453            | 310689    |
| CCDC92   | 0.75157523  | 2.62E-09                       | 100036765 |
| ZC4H2    | -0.76520795 | 3.37E-09 RGD1561708            | 367838    |
| DHX57    | -0.58144784 | 3.59E-09                       | 366532    |
| MCM2     | 0.8999621   | 3.80E-09                       | 312538    |
| SLC41A2  | 1.037418    | 3.80E-09                       | 362861    |
| AOC3     | 1.9076623   | 3.96E-09 SSAO                  | 29473     |
| SLC2A3   | 1.2184542   | 4.09E-09 GLUT3                 | 25551     |
| NRIP1    | -0.7432924  | 4.11E-09 RIP140                | 304157    |
| CLDND1   | 0.586019    | 4.17E-09                       | 288182    |
| BLES03   | -0.8337398  | 4.38E-09                       | 266609    |
| RASGEF1C | -0.9259993  | 4.41E-09                       | 360519    |
| TAGAP    | 1.5805598   | 4.44E-09                       | 308097    |
| PRKAR2A  | 1.4116378   | 4.84E-09                       | 29699     |
| SPNS2    | 1.150435    | 4.93E-09                       | 100270678 |
| MCM6     | 0.58436936  | 5.17E-09 Mcmd6                 | 29685     |
| TMEM218  | -0.89298445 | 5.23E-09 RGD1311364            | 300516    |
| ADCY7    | 1.4964327   | 5.23E-09                       | 84420     |
| CFLAR    | 1.031613    | 5.25E-09 Flip                  | 117279    |

|            |             |          |                      |        |
|------------|-------------|----------|----------------------|--------|
| ATP1B1     | 0.7771755   | 5.34E-09 | ATPBS                | 25650  |
| CCDC86     | 0.79873097  | 5.44E-09 |                      | 293738 |
| CHN2       | -0.97858006 | 5.54E-09 |                      | 84031  |
| DOK4       | -0.7422019  | 5.64E-09 |                      | 361364 |
| SAMD4A     | 1.6091677   | 5.70E-09 | Samd4                | 305826 |
| ZFPM1      | 1.1657131   | 6.00E-09 |                      | 691504 |
| MAN2A1     | 1.3874837   | 6.05E-09 | Mana2 Manno          | 25478  |
| NETO1      | 0.9790565   | 6.11E-09 | RGD1566269           | 307206 |
| SLC4A7     | 1.6119723   | 6.16E-09 | NBC3 NBCn1           | 117955 |
| ORAI2      | -1.1369072  | 6.24E-09 | RGD1310213           | 304592 |
| LRRN3      | -1.0593017  | 6.28E-09 | Nlrr3                | 81514  |
| FAM89A     | 1.0497959   | 6.56E-09 | RGD1309879           | 361441 |
| LOC688613  | -1.1505996  | 7.25E-09 |                      | 688613 |
| LRRTM2     | -0.8271959  | 7.34E-09 |                      | 685472 |
| GUCY1A3    | -1.0689547  | 7.49E-09 | Gucy1a1 SGC          | 497757 |
| NCBP1      | 0.5205126   | 7.53E-09 |                      | 298075 |
| RASGRP2    | -0.6573872  | 7.58E-09 |                      | 361714 |
| RXRG       | -1.9081825  | 7.88E-09 |                      | 83574  |
| FAR1       | 1.0130634   | 7.96E-09 | Mlstd2               | 293173 |
| RGD1563072 | -1.1282976  | 8.27E-09 |                      | 313595 |
| TMEM163    | 1.1404581   | 8.67E-09 | RGD1306212 Sv31      | 360839 |
| BMPER      | 1.1796024   | 9.18E-09 | RGD1563373           | 300455 |
| PER2       | 0.7842451   | 9.52E-09 | rPER2                | 63840  |
| KLC4       | -0.75756204 | 1.23E-08 | 1200014p03rik Kns18  | 316226 |
| ANXA11     | 0.9251612   | 1.25E-08 |                      | 290527 |
| SF1        | 0.58964086  | 1.27E-08 | Zfp162               | 117855 |
| NR1D2      | -0.97861964 | 1.31E-08 | HZF-2                | 259241 |
| KCNN3      | 1.3866298   | 1.32E-08 | KCa2.3 SK3           | 54263  |
| ARRDC1     | -0.8560828  | 1.37E-08 |                      | 366001 |
| DDX21      | 0.96944666  | 1.42E-08 | Ddx21a Ddx21b        | 317399 |
| TM4SF1     | 1.8135058   | 1.55E-08 |                      | 295061 |
| STK26      | 2.1175604   | 1.66E-08 | Mask Mst4 RGD1563568 | 317589 |
| CPNE8      | -0.8491475  | 1.71E-08 |                      | 362988 |
| CRHR1      | 1.1218804   | 1.73E-08 | CRFR1                | 58959  |
| KLF7       | -1.2560346  | 1.84E-08 |                      | 363243 |
| GADD45G    | 1.1591874   | 1.88E-08 |                      | 291005 |
| DLK1       | 1.3777293   | 1.91E-08 | Pref-1 Zog           | 114587 |
| TMEM200C   | -0.834058   | 1.91E-08 | RGD1561734           | 501201 |
| SHROOM2    | -1.0640309  | 1.97E-08 | Ab2-404 Apxl         | 317435 |
| PAM        | 1.0347998   | 1.97E-08 |                      | 25508  |
| CCDC129    | 1.7321779   | 1.97E-08 | RGD1561131           | 500139 |
| PRRT4      | -1.488174   | 2.00E-08 | RGD1559885           | 500059 |
| MAP2K4     | 0.80338305  | 2.04E-08 | MKK4 Sek1            | 287398 |

|              |             |                             |           |
|--------------|-------------|-----------------------------|-----------|
| POPDC2       | -1.1629769  | 2.05E-08                    | 360718    |
| CAPN5        | -0.91000926 | 2.26E-08 Htra3              | 171495    |
| COL4A1       | 1.1251773   | 2.29E-08                    | 290905    |
| HMGCLL1      | -1.0695127  | 2.33E-08 RGD1565090         | 367112    |
| CTSF         | -0.81760997 | 2.34E-08                    | 361704    |
| KLHL24       | -1.0576439  | 2.43E-08 Dre1               | 303803    |
| NFIB         | -0.60702807 | 2.45E-08                    | 29227     |
| KLHL5        | -0.5935278  | 2.49E-08                    | 305351    |
| RGS17        | 0.872459    | 2.49E-08                    | 308118    |
| RGD1564036   | -0.82035017 | 2.69E-08                    | 497895    |
| RGD1561931   | -0.6385058  | 2.73E-08 KIAA2022           | 302396    |
| KLF5         | 0.81559616  | 2.88E-08 Bteb2 IKLF bteb2   | 84410     |
| PDSS2        | -0.96159464 | 2.90E-08                    | 365592    |
| M6PR         | 0.597658    | 2.90E-08                    | 312689    |
| SLC16A14     | 1.4101831   | 2.90E-08                    | 316578    |
| DENND2C      | 1.1995537   | 2.96E-08 RGD1308197         | 295333    |
| GOLPH3       | 0.58364147  | 2.96E-08 Gmx33              | 78961     |
| MYH1         | 2.0129728   | 3.14E-08 MYHC               | 287408    |
| IGSF3        | -0.91093475 | 3.42E-08                    | 295325    |
| ALDH1B1      | -0.90188223 | 3.43E-08                    | 298079    |
| RAMP3        | -1.5966079  | 3.50E-08                    | 56820     |
| BSDC1        | -0.55472773 | 3.50E-08 RGD1311622         | 297890    |
| DUSP2        | 1.0111473   | 3.79E-08                    | 311406    |
| EHBP1        | -0.5281663  | 4.14E-08 RGD1310604         | 305556    |
| LZTS1        | -0.97071993 | 4.18E-08 Psdzip70           | 266711    |
| ZFP775       | -0.81265396 | 4.21E-08 RGD1304910 Znf775  | 312309    |
| LRRTM3       | 0.59607244  | 4.21E-08                    | 294380    |
| RET          | 1.0616585   | 4.21E-08                    | 24716     |
| BVES         | 1.2946421   | 4.30E-08 Popdc1             | 365603    |
| SOCS3        | 1.5331312   | 4.83E-08 Cish3 Socs-3 Ssi-3 | 89829     |
| WNT6         | 1.939307    | 4.89E-08                    | 316526    |
| SPHKAP       | -1.3342793  | 5.50E-08 RGD1311951 Skip    | 316561    |
| NAMPT        | 0.7191915   | 5.65E-08 Pbef Pbef1         | 297508    |
| NIPSNAP3B    | -0.71185213 | 5.84E-08 Nipsnap3a          | 313211    |
| ELAVL4       | -1.0310686  | 5.85E-08 HuD                | 432358    |
| USO1         | 0.5623836   | 6.19E-08 TAP Vdp            | 56042     |
| CITED1       | 1.1248223   | 6.22E-08 Msg1               | 64466     |
| LOC100911664 | 0.53927714  | 6.60E-08                    | 100911664 |
| CMPK2        | -0.8952171  | 6.66E-08 Tyki               | 314004    |
| PRKG2        | 1.1620419   | 7.14E-08 GDPKII cGKII       | 25523     |
| CDCA7L       | 0.7639772   | 7.14E-08                    | 619566    |
| MAF1         | -0.6388791  | 7.44E-08                    | 315093    |
| GFPT2        | -1.1508073  | 8.02E-08                    | 360518    |

|          |             |          |                            |        |
|----------|-------------|----------|----------------------------|--------|
| DMKN     | 2.0456488   | 8.23E-08 | RGD1561521                 | 361548 |
| CAPN2    | 0.5824006   | 8.33E-08 |                            | 29154  |
| FBXO16   | -1.0601866  | 8.40E-08 |                            | 305970 |
| TMEM185B | 0.64008254  | 8.72E-08 | RGD1309602                 | 304731 |
| RHOV     | -1.5801151  | 9.32E-08 | Arhv Chp                   | 171581 |
| TRAFD1   | -0.48449132 | 9.58E-08 | Fln29                      | 114635 |
| IER2     | 1.325633    | 9.85E-08 |                            | 494344 |
| SEC16B   | 1.8399274   | 1.10E-07 | Lztr2 Rgpr                 | 89868  |
| INHA     | -0.918004   | 1.12E-07 |                            | 24504  |
| LOXL2    | 1.6070518   | 1.12E-07 |                            | 290350 |
| AK4      | 1.0069963   | 1.17E-07 | AK 4 Ak3l1 Ak3l2           | 29223  |
| PFKFB3   | 1.393767    | 1.17E-07 |                            | 117276 |
| R3HDM1   | 1.0576135   | 1.18E-07 | R3hdm                      | 304763 |
| SPSB1    | 1.363512    | 1.19E-07 | RGD1309319                 | 313722 |
| ARSJ     | 1.7609345   | 1.21E-07 | RGD1307640                 | 311013 |
| STT3B    | 0.8318333   | 1.27E-07 | RGD1311563                 | 363160 |
| LRRN1    | -0.65649915 | 1.29E-07 |                            | 500280 |
| NYAP1    | -0.97091067 | 1.33E-07 | RGD1310964                 | 304376 |
| SDCCAG8  | -0.66369975 | 1.33E-07 |                            | 305002 |
| EIF3B    | 0.49294233  | 1.33E-07 | Eif3s9                     | 288516 |
| ZC3H18   | 0.51839393  | 1.35E-07 | Nhn1                       | 292067 |
| SEMA3D   | 1.1440028   | 1.39E-07 |                            | 246262 |
| MAN1C1   | 1.0923942   | 1.43E-07 |                            | 362625 |
| UTP4     | 0.62835366  | 1.46E-07 | Cirh1a Cirhin Naic Teg-292 | 291987 |
| IL34     | -1.3838671  | 1.49E-07 |                            | 498951 |
| PCDH19   | -0.9742993  | 1.51E-07 | RGD1565392                 | 317183 |
| GPR50    | 2.0853536   | 1.51E-07 | H9                         | 117097 |
| GMEB1    | 0.9823674   | 1.53E-07 | RGD1563208                 | 500558 |
| FHL2     | 0.9380043   | 1.53E-07 |                            | 63839  |
| CUBN     | 2.0080068   | 1.71E-07 | GP280 IFCR MGA1            | 80848  |
| KIF27    | -1.0214224  | 1.71E-07 | Krp5                       | 246209 |
| SPATA5   | 0.7741053   | 1.71E-07 |                            | 361935 |
| MTHFD2   | 0.72602046  | 1.71E-07 |                            | 680308 |
| PLEKHG5  | 1.1178672   | 1.75E-07 | Tech                       | 310999 |
| FAM214A  | -0.65628093 | 1.77E-07 | RGD1310552                 | 300836 |
| GCK      | -2.0055048  | 1.81E-07 | GLUKA RNGK2                | 24385  |
| KDSR     | -0.7911181  | 1.81E-07 | Fvt1                       | 360833 |
| WASH1    | -0.5980873  | 1.84E-07 | ORF19 Wash Wash2           | 367328 |
| EXTL2    | -0.638926   | 1.94E-07 |                            | 310803 |
| NUDT6    | 1.2347888   | 1.98E-07 | Gfg                        | 207120 |
| THBD     | 1.3691242   | 2.02E-07 |                            | 83580  |
| FRS3     | -1.0738213  | 2.04E-07 |                            | 316213 |
| PPAN     | 0.7546475   | 2.14E-07 |                            | 298699 |

|          |             |                             |           |
|----------|-------------|-----------------------------|-----------|
| PSEN2    | -0.95383596 | 2.16E-07                    | 81751     |
| TAF12    | 0.7070982   | 2.20E-07                    | 682902    |
| PIEZO1   | 1.3669088   | 2.22E-07 Fam38a Mib         | 361430    |
| POLR1B   | 0.85832816  | 2.26E-07 RPA2 Rpo1-2        | 83582     |
| JAK1     | 0.6872115   | 2.32E-07                    | 84598     |
| ST8SIA5  | 1.5325679   | 2.32E-07 SIAT8E             | 364901    |
| HEATR1   | 0.97933376  | 2.34E-07 Heatr1             | 103689953 |
| NIPSNAP1 | -0.55160445 | 2.35E-07                    | 360971    |
| DIAPH1   | 0.7853345   | 2.44E-07 Diap1              | 307483    |
| BID      | -0.71934384 | 2.61E-07                    | 64625     |
| SHROOM4  | 1.8252568   | 2.68E-07 RGD1563434         | 317391    |
| CAMKK1   | 0.8717963   | 2.94E-07                    | 60341     |
| GPR4     | 1.6370957   | 2.95E-07                    | 308408    |
| COL5A1   | 1.3160245   | 3.08E-07                    | 85490     |
| CISH     | -1.1958967  | 3.11E-07 Cis                | 83681     |
| WISP1    | 1.8965559   | 3.13E-07                    | 65154     |
| SPIRE1   | 0.5689147   | 3.20E-07                    | 307348    |
| DCLK1    | 0.74735874  | 3.34E-07 Ania4 Cpg16 Dcamk1 | 83825     |
| KCNMB4   | -0.9178091  | 3.37E-07                    | 66016     |
| MCM5     | 0.86161107  | 3.38E-07                    | 291885    |
| FAM189B  | -0.7885296  | 3.38E-07 RGD1306107         | 310640    |
| PDE6D    | -0.7544312  | 3.39E-07                    | 363272    |
| NFE2L3   | -1.3880478  | 3.41E-07                    | 312331    |
| RBM11    | -1.686274   | 3.45E-07                    | 288321    |
| GPR3     | 1.6430944   | 3.48E-07 Gpcr3              | 266769    |
| CTPS2    | -0.5169076  | 3.54E-07                    | 619580    |
| SEMA4A   | -1.0655426  | 3.60E-07                    | 310630    |
| TMEM182  | 1.8668323   | 3.73E-07 RGD1563696         | 501129    |
| SH3BP5   | -0.78393334 | 3.89E-07 SH3BP-5 Sab Vesp18 | 117186    |
| ANO1     | 1.9408473   | 3.91E-07 Tmem16a            | 309135    |
| MAGEE2   | -1.1971086  | 3.91E-07 RGD1564872         | 302392    |
| PHACTR1  | -0.4929978  | 3.94E-07                    | 306844    |
| CRY1     | 0.66173536  | 4.20E-07                    | 299691    |
| BBX      | 1.1857326   | 4.25E-07                    | 303970    |
| EXOC5    | 0.6701291   | 4.31E-07 Sec10l1            | 60627     |
| LIPG     | 0.99999833  | 4.38E-07 lipase             | 291437    |
| TUBA8    | 1.4122529   | 4.45E-07                    | 500377    |
| RASIP1   | -0.8784184  | 4.49E-07                    | 292912    |
| PHACTR3  | -0.74370235 | 4.52E-07 Scapin1 scapinin   | 362284    |
| MORN4    | -0.7344535  | 4.60E-07 RGD1307336         | 293950    |
| GINS2    | 0.9516325   | 4.76E-07 RGD1311055         | 292058    |
| TEC      | 1.0602809   | 4.79E-07                    | 84492     |
| LIX1     | -0.71060413 | 4.83E-07                    | 292381    |

|         |             |                                   |        |
|---------|-------------|-----------------------------------|--------|
| CRELD1  | -0.76312834 | 4.87E-07                          | 312638 |
| PCGF2   | -0.76668996 | 5.66E-07 Rnf110                   | 287662 |
| ARIH1   | 0.778141    | 5.85E-07                          | 300756 |
| ABCG1   | -0.99028426 | 5.87E-07 Abc8                     | 85264  |
| RXFP3   | 1.8421255   | 6.14E-07 GPCR135 RGD1311550 Rln3i | 294807 |
| KCNJ14  | 0.88561434  | 6.25E-07 Kir2.4                   | 276720 |
| PAK1IP1 | 0.8685161   | 6.37E-07                          | 361232 |
| FGF3    | 1.916067    | 6.37E-07 Int2                     | 170633 |
| RPP38   | 0.7958621   | 6.46E-07                          | 291317 |
| MYADML2 | -1.8337954  | 6.52E-07 RGD1311499               | 303744 |
| USP46   | -0.5572835  | 6.76E-07 RGD1564808               | 289584 |
| NOG     | 1.203545    | 6.77E-07                          | 25495  |
| FAM107B | 0.8400705   | 6.98E-07                          | 498796 |
| NETO2   | 0.7171609   | 7.04E-07                          | 307757 |
| CHST12  | -0.99370766 | 7.57E-07                          | 304322 |
| RAB33A  | -1.1109589  | 7.82E-07 RGD1563280               | 317580 |
| RNF182  | -1.174699   | 8.11E-07 RGD1560399               | 498726 |
| SMTNL2  | -1.0423588  | 8.31E-07                          | 679629 |
| SFMBT1  | 0.7640687   | 8.31E-07 Sfmbt                    | 58967  |
| DOT1L   | 1.225937    | 8.76E-07                          | 362831 |
| DHX40   | -0.69222575 | 8.81E-07                          | 287595 |
| NOL10   | 0.62870246  | 9.12E-07                          | 313981 |
| PHLDA1  | 1.0072471   | 9.22E-07 Tdag                     | 29380  |
| TYRO3   | 0.7946464   | 9.49E-07 Brt                      | 25232  |
| EBF3    | 1.7820029   | 9.59E-07                          | 361668 |
| AGBL5   | -0.7093159  | 9.90E-07                          | 362710 |
| NEUROD1 | -1.4374832  | 9.93E-07                          | 29458  |
| MUM1    | -0.8432682  | 1.11E-06                          | 362838 |
| HEPHL1  | 2.001065    | 1.14E-06 RGD1564835               | 500946 |
| RHBDD3  | -0.65523726 | 1.19E-06 RGD1311827               | 289753 |
| PM20D2  | -0.5811111  | 1.20E-06 Acy1l2                   | 313130 |
| MFSD6   | -0.62734413 | 1.21E-06 RGD1562317               | 301388 |
| TRIM23  | -0.6204789  | 1.21E-06 Ard1 Arfd1               | 81002  |
| DLEU7   | -1.3473     | 1.24E-06 RGD1305071               | 290308 |
| PAK6    | 0.85644025  | 1.27E-06                          | 296078 |
| RHBDF2  | -1.5396582  | 1.28E-06 Rhbdl6                   | 303690 |
| DMTN    | -0.46067888 | 1.31E-06 Epb4.9 Epb49             | 361069 |
| TMEM169 | -0.63025296 | 1.32E-06                          | 690294 |
| SV2B    | -1.1675445  | 1.33E-06                          | 117556 |
| FURIN   | 0.85177886  | 1.40E-06 Pace Pcsk3               | 54281  |
| CACNB1  | 0.829659    | 1.48E-06                          | 50688  |
| ACKR3   | -0.89520156 | 1.50E-06 Cmkor1 Cxcr7 Rdc1        | 84348  |
| GPR88   | 0.56655765  | 1.55E-06                          | 64443  |

|            |             |                                    |        |
|------------|-------------|------------------------------------|--------|
| ZDHHC14    | 1.0382525   | 1.59E-06 Dhhc14                    | 499014 |
| KMT2E      | -0.5801543  | 1.67E-06 Mll5                      | 311968 |
| FDFT1      | -0.5545826  | 1.74E-06                           | 29580  |
| S100A10    | 0.73875827  | 1.77E-06 p11                       | 81778  |
| APOLD1     | 1.394856    | 1.77E-06 Verge                     | 444983 |
| KCNH4      | -1.2192159  | 1.78E-06 Bec2                      | 114032 |
| LRSAM1     | -0.7647853  | 1.81E-06 RGD1564403                | 311866 |
| KLHL23     | -0.50264704 | 1.82E-06 RGD1307166                | 311114 |
| TAC1       | 1.7067176   | 1.82E-06 PPTA3 Ppt5fl RATPPTA3 TAC | 24806  |
| SLC30A3    | 1.1141921   | 1.84E-06 ZnT3                      | 366568 |
| RIN1       | 1.6419429   | 1.84E-06                           | 207119 |
| ACTR3B     | -0.59213006 | 1.90E-06 RGD1565759                | 362298 |
| CTRB1      | 1.2300013   | 1.91E-06 Ctrb                      | 24291  |
| OPRL1      | -0.82617456 | 1.97E-06 KOR-3 KOR3 LC132 MOR-C    | 29256  |
| FYTTD1     | 0.55285794  | 1.99E-06 Ac1176 RGD1306899         | 360726 |
| JAK2       | 0.8380113   | 1.99E-06                           | 24514  |
| ANKS1B     | 0.6663737   | 2.02E-06 AIDA-1 EB-1 RGD1565556    | 314721 |
| HP1BP3     | -0.42026517 | 2.03E-06                           | 313647 |
| HSF1       | 0.59237087  | 2.05E-06                           | 79245  |
| WDR45B     | 0.736058    | 2.07E-06 RGD1305141 WIPI-3 Wdr45l  | 360682 |
| RAB30      | -0.98914146 | 2.08E-06 Rsb30                     | 308821 |
| FLRT1      | 1.3457637   | 2.08E-06 RGD1565152                | 499308 |
| MRT04      | 0.5574501   | 2.12E-06 RGD1311709                | 298586 |
| GRM1       | -1.2940531  | 2.16E-06 Gprc1a                    | 24414  |
| PTGER4     | 1.7010512   | 2.17E-06 EP4 Ptger Ptgerep4        | 84023  |
| SH2B2      | -0.9922354  | 2.18E-06 Aps                       | 114203 |
| NUAK1      | -1.0095615  | 2.19E-06 RGD1309956                | 299694 |
| NOP56      | 0.6859545   | 2.21E-06 Nol5a                     | 362214 |
| C1S        | 0.96534324  | 2.28E-06 r-gsp                     | 192262 |
| ANKRD34A   | -0.8755667  | 2.31E-06 Ankrd34 RGD1308412        | 295283 |
| UBE2G2     | 0.7997212   | 2.34E-06                           | 294331 |
| ACVR1C     | 1.5148302   | 2.40E-06 Alk-7 Alk7 habrec1        | 245921 |
| P2RY14     | 1.9522917   | 2.41E-06 Gpr105                    | 171108 |
| EZH1       | -0.90584284 | 2.46E-06                           | 303547 |
| CD59       | -0.5351856  | 2.66E-06 Cd59a Cd59b MAC-IP MACII  | 25407  |
| RGD1305537 | 0.8518127   | 2.66E-06                           | 363528 |
| MXD4       | -0.6188515  | 2.75E-06                           | 360961 |
| RWDD2A     | -1.2374972  | 2.75E-06 Rwdd2                     | 363110 |
| LEF1       | 1.3694166   | 2.80E-06                           | 161452 |
| MAP7D1     | 0.87675613  | 3.05E-06 Mtap7d1                   | 681287 |
| GPR22      | 0.5187866   | 3.07E-06                           | 298944 |
| MLLT3      | 0.5354938   | 3.07E-06 Af-9 Af9                  | 114510 |
| GRM6       | -1.2690232  | 3.12E-06 mGluR6                    | 24419  |



|            |             |          |                         |        |
|------------|-------------|----------|-------------------------|--------|
| MED15      | 0.88584226  | 3.17E-06 | Pcqap                   | 360743 |
| TRMT61A    | 0.90787005  | 3.18E-06 | Gcd14 RGD1359191 Trm61  | 314462 |
| PNRC1      | -1.1859689  | 3.19E-06 | Prol2                   | 286988 |
| TRIM24     | 0.5507146   | 3.20E-06 |                         | 500084 |
| RYK        | 0.48857123  | 3.21E-06 |                         | 140585 |
| CCDC184    | -0.8354163  | 3.21E-06 |                         | 500925 |
| PNPLA3     | 0.5412728   | 3.25E-06 | Adpn                    | 362972 |
| DDX3X      | 0.61162984  | 3.26E-06 |                         | 317335 |
| CBX8       | -0.77355605 | 3.33E-06 |                         | 303731 |
| AMOTL2     | -0.72246194 | 3.36E-06 | Lccp                    | 65157  |
| MUSTN1     | 1.5033047   | 3.40E-06 | Mustang                 | 290553 |
| SMR3B      | 1.9007351   | 3.43E-06 | Arp P2-VA1 RATSMR1A Smr | 24867  |
| PPP4R1     | 0.5003029   | 3.52E-06 | Pp4r1                   | 140943 |
| WIPI2      | 0.59669757  | 3.53E-06 |                         | 288498 |
| CHRNA5     | -1.0467976  | 3.57E-06 |                         | 25102  |
| SEMA4G     | -0.8667875  | 3.59E-06 |                         | 361764 |
| ANKRD6     | -0.76407593 | 3.61E-06 |                         | 500430 |
| STK40      | 0.6637745   | 3.61E-06 | Lyk4 RGD1307310         | 360230 |
| PSD2       | -0.88123    | 3.78E-06 |                         | 307500 |
| PTK2       | 0.50821215  | 3.91E-06 | FAK FRNK p125FAK        | 25614  |
| ADAMTS1    | 1.6356838   | 3.93E-06 |                         | 79252  |
| TMEM2      | 0.9436111   | 3.98E-06 |                         | 309400 |
| CAMK1G     | 0.65445167  | 4.01E-06 |                         | 171358 |
| DUSP23     | -1.3225392  | 4.08E-06 |                         | 360881 |
| SLC6A15    | -0.55569607 | 4.13E-06 | Ntt73                   | 282712 |
| EVA1A      | 1.090327    | 4.15E-06 | Fam176a RGD1559797 Tmei | 500221 |
| FLOT2      | -0.824491   | 4.20E-06 |                         | 83764  |
| UCK2       | 0.7105085   | 4.28E-06 | Umpk                    | 304944 |
| RCAN2      | 0.67361695  | 4.29E-06 | Dcip2 Dscr11 Zaki-4     | 140666 |
| SLC17A5    | -0.5625441  | 4.46E-06 |                         | 363103 |
| GLRB       | -0.499963   | 4.53E-06 |                         | 25456  |
| POLG       | 1.0007834   | 4.56E-06 |                         | 85472  |
| KY         | -1.4094783  | 4.59E-06 |                         | 315962 |
| LRRC28     | -0.76801777 | 4.67E-06 |                         | 361588 |
| KLHL7      | -0.6506814  | 4.74E-06 |                         | 362303 |
| SNAP47     | -0.87896234 | 4.74E-06 | RGD735194 SNAP-47       | 303183 |
| 42984      | -0.6011752  | 4.76E-06 |                         | 691335 |
| CHODL      | -1.4929341  | 4.78E-06 |                         | 288289 |
| RGD1560108 | -0.43833774 | 4.79E-06 |                         | 499309 |
| EDRF1      | 0.54816943  | 4.90E-06 | RGD1306820              | 309069 |
| CNTFR      | 0.72213113  | 4.95E-06 |                         | 313173 |
| LAMB3      | 1.7776339   | 5.01E-06 |                         | 305078 |
| HS6ST1     | 0.5523936   | 5.03E-06 |                         | 316325 |

|           |             |          |                            |        |
|-----------|-------------|----------|----------------------------|--------|
| PKD2      | 0.824576    | 5.14E-06 | RGD1559992 Trpp2           | 498328 |
| CTBP2     | 0.5165653   | 5.20E-06 |                            | 81717  |
| POP1      | 0.5550531   | 5.20E-06 |                            | 315045 |
| ARHGAP17  | 0.8164248   | 5.39E-06 | Rich1                      | 63994  |
| KLF2      | 1.3385966   | 5.52E-06 | Lklf                       | 306330 |
| SEMA4F    | -0.8862101  | 5.93E-06 |                            | 29745  |
| CDT1      | 0.92074645  | 6.04E-06 | Ris2                       | 292071 |
| CD200     | -0.64339024 | 6.06E-06 | Cspmo2 MRCOX2 Mox2         | 24560  |
| SIDT1     | -0.6057637  | 6.46E-06 |                            | 288109 |
| SIGMAR1   | 0.45852426  | 6.50E-06 | Oprs1                      | 29336  |
| GPR165    | -1.2783878  | 6.53E-06 | RGD1564566                 | 296866 |
| ADGRB3    | -0.7330781  | 6.67E-06 | Bai3                       | 301309 |
| THAP3     | -0.98641676 | 6.70E-06 | RGD1308109                 | 362667 |
| MBNL2     | -0.6090734  | 7.04E-06 |                            | 680445 |
| SERPINE1  | 1.582575    | 7.13E-06 | PAI1A Pai1 Pai1aa Planh RA | 24617  |
| GBX1      | 1.7539651   | 7.19E-06 |                            | 246149 |
| ZFP746    | 0.50782764  | 7.19E-06 | RGD1306209 Znf746          | 312303 |
| GABRA1    | -0.7911423  | 7.22E-06 |                            | 29705  |
| DIP2C     | 1.0089853   | 7.51E-06 | RGD1560155                 | 307067 |
| PPP2R2B   | -0.44699788 | 7.90E-06 | Pppr2b2                    | 60660  |
| ARHGAP20  | -1.062759   | 7.97E-06 | RARhoGAP                   | 367085 |
| GPR6      | -1.4827788  | 8.05E-06 |                            | 83683  |
| GMEB2     | 1.0013711   | 8.15E-06 |                            | 83635  |
| PINX1     | 0.8684557   | 8.17E-06 | RGD1566025                 | 305963 |
| ROCK2     | 0.7401482   | 8.20E-06 | ROCK-II ROK                | 25537  |
| HMGA2     | 1.7194638   | 8.42E-06 | Hmgic                      | 84017  |
| DDX20     | 0.65328026  | 8.54E-06 | Dp103                      | 84473  |
| LOC682102 | -0.9888662  | 8.75E-06 |                            | 682102 |
| RND3      | 0.6508618   | 9.11E-06 | Arhe RHOE                  | 295588 |
| AIPL1     | 1.7215822   | 9.75E-06 |                            | 59110  |
| PRSS35    | 1.2670162   | 9.79E-06 |                            | 315866 |
| RXRB      | -0.709745   | 1.02E-05 | RXR-beta                   | 361801 |
| IFT88     | -0.60537183 | 1.02E-05 | Ttc10                      | 305918 |
| TOR1B     | 0.5286337   | 1.02E-05 |                            | 311854 |
| RNF39     | 0.929221    | 1.02E-05 | Hzfw1 Lirf                 | 171387 |
| LRRC17    | 0.96172076  | 1.03E-05 |                            | 502715 |
| TMEM143   | -0.8737467  | 1.03E-05 | RGD1305013                 | 308593 |
| SH3GL1    | 0.6641487   | 1.05E-05 | SH3P8                      | 81922  |
| GNAI1     | 0.4840802   | 1.07E-05 | BPGTPB                     | 25686  |
| AHI1      | 0.7709468   | 1.11E-05 | Ahi-1                      | 308923 |
| CRLF3     | 0.7767652   | 1.12E-05 | Cytor4                     | 54395  |
| REEP1     | -0.51963574 | 1.12E-05 | RGD1305230                 | 362384 |
| LRRC56    | -0.7891569  | 1.13E-05 | RGD1311654                 | 365389 |

|            |             |          |                               |
|------------|-------------|----------|-------------------------------|
| CALCOCO1   | -0.6872678  | 1.13E-05 | 246047                        |
| ARHGEF9    | 0.41439357  | 1.13E-05 | 66013                         |
| GFOD1      | 1.3111984   | 1.13E-05 | 306842                        |
| DDIT3      | 1.1716156   | 1.13E-05 | CHOP CHOP-10 Chop10 Gac 29467 |
| AEN        | 0.58869857  | 1.14E-05 | lsg201 RGD1305051 361594      |
| SUOX       | -0.5694383  | 1.15E-05 | 81805                         |
| ETF1       | 0.7109775   | 1.15E-05 | 307503                        |
| SLAIN2     | 0.45768374  | 1.17E-05 | RGD1311593 305310             |
| GPC2       | -0.5883749  | 1.19E-05 | 171517                        |
| MNT        | -0.8582651  | 1.21E-05 | 287521                        |
| KLHL36     | -0.8790037  | 1.22E-05 | 498957                        |
| GTPBP4     | 1.0413588   | 1.22E-05 | Crfg RGD1563564 114300        |
| PLK3       | 0.5974189   | 1.25E-05 | Cnk Fnk 58936                 |
| ACSL3      | 0.60574263  | 1.27E-05 | Acs3 FacI3 114024             |
| CHST8      | 0.5964559   | 1.27E-05 | 308511                        |
| DISC1      | 1.3237586   | 1.28E-05 | 307940                        |
| FBN2       | 1.3433425   | 1.30E-05 | 689008                        |
| SKP2       | 0.5353479   | 1.30E-05 | RGD1562456 294790             |
| USP16      | 0.87004346  | 1.32E-05 | 288306                        |
| FAM65B     | 0.9654181   | 1.32E-05 | Ab2-162 RGD1306939 306934     |
| FZD1       | -0.8275878  | 1.33E-05 | 58868                         |
| UST        | 1.0437173   | 1.34E-05 | 361450                        |
| AGFG1      | 0.48620692  | 1.34E-05 | 363266                        |
| ADRA1A     | 1.5817711   | 1.34E-05 | Adra1c 29412                  |
| APC2       | -0.98123884 | 1.36E-05 | 299611                        |
| ZFP786     | -0.7909573  | 1.41E-05 | 100158223                     |
| RGS12      | -0.6019134  | 1.41E-05 | 54292                         |
| SRPK1      | 0.5421408   | 1.42E-05 | 361811                        |
| PNOC       | 1.4730601   | 1.42E-05 | N23K Npnc1 25516              |
| JADE3      | 1.0835265   | 1.43E-05 | RGD1563945 299305             |
| GPR85      | -0.59075433 | 1.43E-05 | Srep2 64020                   |
| SCN3B      | -0.73834014 | 1.48E-05 | Scnb3 245956                  |
| MYO9B      | 0.7637376   | 1.48E-05 | 25486                         |
| SMPD3      | -0.6857319  | 1.49E-05 | cca1 94338                    |
| GPR139     | -1.578461   | 1.50E-05 | 293545                        |
| DOCK8      | 1.2737018   | 1.55E-05 | 499337                        |
| KBTBD8     | 0.83205956  | 1.59E-05 | RGD1563166 500262             |
| FAM98A     | 0.43262425  | 1.65E-05 | RGD1305486 313873             |
| QPCT       | -0.9462288  | 1.66E-05 | Qpctl1 RGD1562284 313837      |
| RAP1B      | 0.7506237   | 1.66E-05 | 171337                        |
| RGD1359127 | 0.82780486  | 1.69E-05 | 299612                        |
| LOC314140  | 0.6524896   | 1.70E-05 | 314140                        |
| LGI1       | -1.0688856  | 1.70E-05 | 252892                        |

|            |             |          |                     |           |
|------------|-------------|----------|---------------------|-----------|
| ADORA2A    | -1.735874   | 1.75E-05 | A2ar ADENO Adora2l1 | 25369     |
| DES        | 1.4596198   | 1.75E-05 |                     | 64362     |
| FAM185A    | 0.63159645  | 1.78E-05 | RGD1562135          | 499979    |
| IQSEC3     | 0.91643864  | 1.78E-05 | sag                 | 404781    |
| GRPEL2     | 0.7165067   | 1.81E-05 | Afap1l1             | 688777    |
| CDR2       | 0.5496149   | 1.81E-05 | RGD1310578          | 308958    |
| TDRD7      | 0.48013663  | 1.84E-05 | Pctaire2bp          | 85425     |
| QTRT2      | 0.6236451   | 1.88E-05 | Qtrtd1              | 288364    |
| SPTSSB     | -1.2580304  | 1.89E-05 |                     | 100362555 |
| WBSCR22    | 0.64965624  | 1.89E-05 |                     | 368084    |
| STRADB     | -0.4698745  | 1.90E-05 | Als2cr2 RGD1559449  | 501146    |
| TAF1C      | 0.68430364  | 1.90E-05 |                     | 361420    |
| FAM110D    | -1.0217975  | 1.93E-05 | Grrp1 RGD1564994    | 500563    |
| CEP70      | -0.81666386 | 1.93E-05 |                     | 367153    |
| ARHGEF28   | -0.7162797  | 1.96E-05 | Rgnef               | 361882    |
| CLN8       | -0.578793   | 1.97E-05 |                     | 306619    |
| CDC14A     | 1.0829693   | 1.97E-05 |                     | 310806    |
| TOX3       | -0.69983387 | 2.04E-05 | Tnrc9               | 291908    |
| UTP20      | 0.86299187  | 2.14E-05 | RGD1560606          | 314713    |
| BTBD10     | 0.4444746   | 2.15E-05 | RGD1306301          | 308890    |
| MB21D2     | -0.5345009  | 2.21E-05 | RGD1559643          | 498100    |
| RGD1306227 | -0.7342393  | 2.21E-05 |                     | 310377    |
| FYN        | 0.42917925  | 2.24E-05 |                     | 25150     |
| SPIRE2     | -0.7114268  | 2.24E-05 |                     | 307925    |
| USP7       | 0.71191597  | 2.34E-05 | Hausp               | 360471    |
| TRIQK      | -0.8763315  | 2.35E-05 |                     | 500413    |
| GPR52      | -1.0711756  | 2.39E-05 |                     | 684623    |
| POLL       | -0.72658974 | 2.41E-05 |                     | 361767    |
| EAFL       | 0.6044422   | 2.41E-05 |                     | 306261    |
| MAT2B      | -0.71800137 | 2.59E-05 |                     | 683630    |
| APLP2      | 0.4543415   | 2.60E-05 | APLP-2 Apph WALPLP2 | 64312     |
| HOMER2     | 0.74575526  | 2.72E-05 | Vesl-2              | 29547     |
| CCNF       | 0.7937148   | 2.72E-05 |                     | 117524    |
| CCDC28A    | -1.1651317  | 2.75E-05 | RGD1310326          | 361454    |
| CARF       | -0.8988426  | 2.77E-05 | Als2cr8             | 301446    |
| CSNK2A2    | 0.50321984  | 2.78E-05 |                     | 307641    |
| ING4       | -0.56335753 | 2.79E-05 |                     | 297597    |
| RAB20      | 1.3043      | 2.80E-05 |                     | 689377    |
| CD63       | 0.48863277  | 2.87E-05 |                     | 29186     |
| ZFP90      | -0.8119344  | 2.88E-05 |                     | 498945    |
| KL         | 1.7558788   | 2.90E-05 |                     | 83504     |
| NOC3L      | 0.7142255   | 2.90E-05 | RGD1560656          | 361753    |
| SYTL5      | 1.532306    | 2.90E-05 |                     | 302538    |

|              |             |                            |           |
|--------------|-------------|----------------------------|-----------|
| USP36        | 0.6773198   | 2.91E-05                   | 303700    |
| EPHA3        | -1.1606913  | 2.95E-05                   | 29210     |
| LRFN5        | -0.6818887  | 2.95E-05                   | 314164    |
| TMEM25       | -0.8241418  | 2.97E-05                   | 689172    |
| ZFYVE9       | 0.61857194  | 2.99E-05                   | 313477    |
| GCLC         | 0.66398966  | 3.03E-05 Glclc             | 25283     |
| PAK7         | -0.50225145 | 3.05E-05 PAK-5 PAK-7       | 311450    |
| AKIRIN1      | 0.4189056   | 3.07E-05                   | 595134    |
| DGKA         | 0.7506357   | 3.07E-05 Dagk1             | 140866    |
| ST3GAL3      | -0.68850714 | 3.15E-05 Siat6             | 64445     |
| IGSF8        | -0.7526169  | 3.16E-05                   | 304979    |
| NR4A1        | 0.8427543   | 3.23E-05 HMR Ngfi-b Nur77  | 79240     |
| PDE8A        | 1.5737009   | 3.23E-05 RNPDE8A           | 308776    |
| PLAA         | 0.5160917   | 3.25E-05 PLA2P Plap        | 116645    |
| GOLGB1       | -0.776303   | 3.28E-05                   | 192243    |
| FNDC3B       | 1.1798513   | 3.28E-05 RGD1311673        | 294925    |
| TRMT10C      | 0.54266685  | 3.33E-05 Rg9mtd1           | 304012    |
| LMO7         | -0.53625363 | 3.35E-05                   | 361084    |
| ZFP180       | 0.539561    | 3.35E-05 rKr1              | 246279    |
| NSUN2        | 0.41097412  | 3.38E-05 RGD1311954        | 361191    |
| CPNE4        | -0.5717217  | 3.45E-05                   | 367160    |
| PLEKHA3      | 0.5255029   | 3.53E-05                   | 295674    |
| SNTG2        | -1.1350543  | 3.58E-05                   | 298936    |
| PLPP6        | -0.62889516 | 3.58E-05 Ppapdc2           | 619549    |
| SLC30A4      | 0.54896474  | 3.58E-05                   | 64469     |
| PUS3         | 0.74455327  | 3.64E-05 RGD1310757        | 315554    |
| LOC100125362 | 0.5085785   | 3.65E-05                   | 100125362 |
| AUH          | -0.6037643  | 3.67E-05                   | 361215    |
| DIO3         | 1.3018848   | 3.67E-05 5DIII DIOIII      | 29475     |
| LPL          | -0.6849811  | 3.69E-05                   | 24539     |
| ABI1         | 0.47359344  | 3.74E-05 E3b1              | 79249     |
| LRRRC20      | -0.63568723 | 3.79E-05 RGD1566140        | 499430    |
| ZFP217       | 1.2785103   | 3.79E-05 Znf217            | 311764    |
| SPTBN4       | 0.690293    | 3.86E-05 Spnb4             | 308458    |
| PXDC1        | 0.7435586   | 3.88E-05 RGD1311307        | 361238    |
| ZBTB2        | 0.50025356  | 3.90E-05                   | 308126    |
| LZIC         | -0.4655248  | 3.93E-05                   | 366507    |
| ARRDC4       | -1.01276    | 3.93E-05 Ab1-209 LRRG00117 | 293019    |
| FHDC1        | 0.9313067   | 3.99E-05 RGD1311955        | 295161    |
| MFAP3L       | 1.1268398   | 4.04E-05                   | 306424    |
| DLG1         | 0.9289756   | 4.09E-05 Dlgh1 SAP97       | 25252     |
| GPRC5C       | -1.4309026  | 4.09E-05                   | 287805    |
| STOML1       | -0.912747   | 4.12E-05 RGD1559463        | 300748    |

|           |             |                                    |           |
|-----------|-------------|------------------------------------|-----------|
| CDC6      | 0.76084006  | 4.13E-05                           | 360621    |
| MAML3     | 1.4926767   | 4.14E-05 Glrp1                     | 310405    |
| MICU3     | 0.52570915  | 4.16E-05 Efha2                     | 364601    |
| CSNK1A1   | 0.44439343  | 4.18E-05                           | 113927    |
| PIANP     | -0.7880445  | 4.18E-05 PANP RGD1304952 leda-1    | 312711    |
| TARS      | 0.61816424  | 4.22E-05                           | 294810    |
| PAPPA     | 1.6625159   | 4.26E-05                           | 313262    |
| SNX9      | 0.6418308   | 4.33E-05                           | 683687    |
| GMPS      | 0.5733719   | 4.34E-05                           | 295088    |
| HSPA1B    | 1.301831    | 4.35E-05 HSP70.2 Hsp70-1 Hsp70-2 H | 294254    |
| FFAR4     | 1.700831    | 4.36E-05 Gpr120 O3far1             | 294075    |
| PDE4C     | 1.7066025   | 4.45E-05 Dpde1                     | 290646    |
| RYBP      | 0.52183354  | 4.59E-05                           | 312603    |
| GPR63     | 1.2530905   | 4.71E-05                           | 297952    |
| GSPT1     | 0.6912279   | 4.78E-05                           | 24420     |
| MAPK15    | -1.170575   | 4.78E-05 Erk7                      | 286997    |
| CNTN2     | -1.07381    | 4.82E-05 TAG-1 TAG-564 TAG1 Tax    | 25356     |
| NFX1      | 0.3948233   | 4.82E-05                           | 313166    |
| KCNJ12    | 0.87608784  | 4.89E-05 IRK2 Kir2.1 Kir2.2        | 117052    |
| NOLC1     | 0.45543104  | 4.90E-05 Nopp140                   | 64896     |
| AFTPH     | 0.57212704  | 4.90E-05 RGD1311920                | 305544    |
| CUX2      | -0.9501184  | 4.99E-05 Cutl2                     | 288665    |
| CHST7     | 0.7684695   | 5.02E-05 Gn6st-4                   | 302302    |
| CDH17     | 1.6838155   | 5.18E-05                           | 117048    |
| TBC1D17   | -0.6419177  | 5.20E-05                           | 292886    |
| ITM2C     | -0.7251217  | 5.24E-05                           | 301575    |
| GSPT2     | 0.48441496  | 5.29E-05 RGD1563213                | 501582    |
| CDK13     | 0.6838744   | 5.43E-05 Cdc2l5                    | 306998    |
| SRD5A1    | -0.5419333  | 5.63E-05 S5AR 1                    | 24950     |
| LOC688459 | 1.670172    | 5.78E-05                           | 688459    |
| KPNA4     | 0.6832937   | 5.95E-05 importin                  | 361959    |
| SLC35E3   | 0.3921884   | 5.99E-05 RGD1564876                | 362883    |
| RABGEF1   | 0.44292256  | 6.03E-05                           | 360797    |
| TTC8      | -0.66576236 | 6.14E-05                           | 299246    |
| PGAM1     | 0.51403296  | 6.19E-05 PGAM-B Pgmur              | 24642     |
| LPCAT2    | 0.8675699   | 6.19E-05 LPCAT-2 RGD1563994        | 100359680 |
| LSS       | 0.47092003  | 6.24E-05                           | 81681     |
| DNAJC12   | -0.8063608  | 6.25E-05 Jdp1                      | 619393    |
| MIOS      | 0.52154845  | 6.26E-05 RGD1308432                | 362324    |
| NUTM1     | 1.1681896   | 6.33E-05 Nut RGD1564529            | 366153    |
| VWC2L     | -1.4620417  | 6.33E-05 RGD1565501                | 501160    |
| ADAMTS5   | 1.2069982   | 6.36E-05                           | 304135    |
| ZBTB5     | -0.68663055 | 6.41E-05                           | 298084    |

|           |             |                             |        |
|-----------|-------------|-----------------------------|--------|
| COBL      | -0.50902236 | 6.44E-05                    | 305497 |
| EPHB6     | -0.86060816 | 6.53E-05                    | 312275 |
| MFSD9     | -0.6942437  | 6.59E-05 RGD1562212         | 316356 |
| TTC9      | 0.6224589   | 6.69E-05 RGD1565985         | 500689 |
| IL17RA    | 0.61163193  | 6.82E-05 Il17r              | 312679 |
| MAFK      | -0.61563605 | 7.17E-05                    | 246760 |
| RNF150    | 0.78642243  | 7.18E-05 RGD1304572         | 364983 |
| ZFAND5    | 0.5366909   | 7.23E-05 Zfp216             | 293960 |
| PDIK1L    | -0.41942006 | 7.28E-05 RGD1307476 Stk35l2 | 313609 |
| HAS1      | 1.446656    | 7.31E-05                    | 282821 |
| FAM118A   | -0.7019109  | 7.37E-05 RGD1560783         | 300120 |
| CX3CL1    | 0.60973     | 7.42E-05 Cx3c Scyd1         | 89808  |
| CUL9      | -0.67350787 | 7.45E-05 Parc RGD1562008    | 316228 |
| EIF4A1    | 0.7466136   | 7.47E-05                    | 287436 |
| MMS22L    | 0.6067737   | 7.50E-05 RGD1304693         | 313108 |
| PNCK      | -0.8705656  | 7.59E-05 Camk1b             | 29660  |
| CHRM2     | 1.338223    | 7.59E-05 Acm2               | 81645  |
| ARRB2     | -0.75203335 | 7.63E-05 BARRES             | 25388  |
| UHRF1BP1L | 0.48176548  | 7.63E-05                    | 363009 |
| 42987     | 0.5782184   | 7.70E-05 Eseptin Msf Slpa   | 83788  |
| BAD       | -0.535574   | 7.98E-05                    | 64639  |
| ACTN4     | 0.5552806   | 8.00E-05                    | 63836  |
| MTMR14    | -0.68917155 | 8.07E-05 RGD1304842         | 312634 |
| TEF       | -0.535716   | 8.07E-05                    | 29362  |
| SYK       | 0.8088468   | 8.11E-05 p72syk             | 25155  |
| BBC3      | -0.8880315  | 8.11E-05 Puma               | 317673 |
| TMEM53    | -0.9829783  | 8.27E-05 RGD1307066         | 313529 |
| TOR4A     | 1.0359523   | 8.44E-05 RGD1308019         | 311795 |
| CLIP2     | -0.5369201  | 8.51E-05 CLIP-115 Cyln2     | 29264  |
| XKR8      | 0.7255713   | 8.53E-05 RGD1305649 XRG8    | 313033 |
| EPDR1     | 0.46413752  | 8.55E-05 Epdr2 MERP2        | 291180 |
| DIRAS1    | -0.8976908  | 8.84E-05                    | 366826 |
| IFNGR2    | -0.4437649  | 8.88E-05                    | 360697 |
| PRKAR1A   | 0.49870515  | 8.98E-05 RIIA               | 25725  |
| KLHL14    | -1.0380788  | 9.21E-05 RGD1566178         | 364823 |
| DDX18     | 0.685768    | 9.26E-05 MrDb               | 308490 |
| OTUD3     | 0.9555002   | 9.28E-05 RGD1560468         | 500572 |
| ARID3C    | 1.5952957   | 9.28E-05 RGD1560943         | 502946 |
| MAST1     | -0.60119736 | 9.42E-05 Sast               | 353118 |
| CIRBP     | -0.72022355 | 9.57E-05                    | 81825  |
| ARF6      | 0.44755846  | 9.57E-05                    | 79121  |
| ZHX1      | -0.44386098 | 9.62E-05                    | 171159 |
| DDAH2     | -0.56704617 | 9.77E-05                    | 294239 |

|          |             |                                   |        |
|----------|-------------|-----------------------------------|--------|
| ARG2     | 0.5525799   | 1.01E-04                          | 29215  |
| EPB41L4B | 1.0035497   | 1.02E-04 RGD1562988               | 500464 |
| UNC119   | -0.6921164  | 1.03E-04 RRG4 Uncl19              | 29402  |
| AMIGO2   | -0.78318065 | 1.03E-04 Ali1                     | 300186 |
| CYS1     | -0.99969214 | 1.03E-04                          | 690489 |
| POU6F1   | 0.9946661   | 1.03E-04 Brn5                     | 116545 |
| VIPAS39  | -0.49750003 | 1.04E-04 Spe39 Vipar hSPE-39      | 681989 |
| GDNF     | 1.6205387   | 1.07E-04 gndf                     | 25453  |
| MPEG1    | -1.1206188  | 1.09E-04 Mpg-1                    | 64552  |
| PALMD    | -0.99204695 | 1.10E-04                          | 310811 |
| CXCR4    | -0.614934   | 1.11E-04                          | 60628  |
| COQ10B   | 0.5414451   | 1.11E-04 RGD1359509               | 301416 |
| LDLRAD4  | 0.8536135   | 1.11E-04                          | 679578 |
| LUZP1    | 0.72387207  | 1.11E-04 Luzp                     | 79428  |
| PPRC1    | 0.7030932   | 1.13E-04                          | 294007 |
| MSS51    | 0.8746994   | 1.14E-04 Zmynd17                  | 289904 |
| TPPP3    | -1.1469681  | 1.15E-04 CGI-38 RGD1305061        | 291966 |
| VPS9D1   | -0.5139628  | 1.16E-04 RGD1565149               | 307923 |
| CTU2     | 0.70760155  | 1.16E-04 Ncs2                     | 292069 |
| LYPD1    | -0.7614784  | 1.17E-04 Lypdc1                   | 360838 |
| SPEM1    | 0.72259897  | 1.18E-04                          | 691981 |
| USP28    | 0.65976477  | 1.21E-04                          | 315639 |
| PRR15    | 1.2841624   | 1.21E-04 RGD1311589               | 312358 |
| CEP131   | -0.7585036  | 1.23E-04 Azi1                     | 360672 |
| WFS1     | 0.7863216   | 1.23E-04                          | 83725  |
| PARP16   | -0.77560216 | 1.23E-04 ARTD15 LRRGT00109 RGD13  | 315760 |
| COX19    | -0.611949   | 1.24E-04 RGD1305631               | 304330 |
| SLC35F2  | -0.8826118  | 1.25E-04                          | 300713 |
| LRRC10B  | 1.3151493   | 1.25E-04 RGD1564983               | 309208 |
| STEAP1   | 1.3752855   | 1.25E-04 Steap                    | 297738 |
| LMO2     | 1.2145776   | 1.26E-04                          | 362176 |
| BMP6     | 0.74068916  | 1.27E-04 VGR                      | 25644  |
| GRIN1    | 0.56461716  | 1.36E-04 GluN1 NMDAR1 NR1         | 24408  |
| PTCHD1   | 1.2826488   | 1.36E-04 RGD1564527               | 317517 |
| ARPC5    | 0.51324344  | 1.36E-04                          | 360854 |
| FAM136A  | -0.5223806  | 1.39E-04 RGD1304825               | 297415 |
| CYP2S1   | -1.3139243  | 1.41E-04                          | 308445 |
| PNPO     | -0.6106862  | 1.41E-04                          | 64533  |
| MVK      | -0.59577304 | 1.42E-04 Lrbp                     | 81727  |
| IMPDH2   | 0.5349753   | 1.44E-04 IMPD 2 IMPDH 2           | 301005 |
| SOGA3    | -0.4308755  | 1.45E-04 Kiaa0408 RGD1307525 Rgd1 | 292199 |
| CHRNA3   | -1.1553017  | 1.46E-04                          | 25101  |
| TRPV2    | -0.7396124  | 1.49E-04 Vrl1                     | 29465  |



|            |             |                                   |        |
|------------|-------------|-----------------------------------|--------|
| B4GALT7    | -0.6417235  | 1.52E-04                          | 364675 |
| ZFP467     | -0.6218755  | 1.52E-04 Znf467                   | 500110 |
| GPSM2      | 0.4762065   | 1.52E-04 RGD1560967               | 362021 |
| TBKBP1     | 0.5302589   | 1.55E-04 Prosapip2                | 266764 |
| ICK        | -0.6124105  | 1.57E-04                          | 84411  |
| NAB1       | 0.438405    | 1.61E-04                          | 64824  |
| SLC18A2    | 0.5498699   | 1.62E-04 MNAT VMAT-2 VMAT2        | 25549  |
| PAPOLA     | 0.44860807  | 1.63E-04                          | 314417 |
| RALYL      | -0.802912   | 1.65E-04 RGD1305844               | 294883 |
| ZFAT       | 0.6622704   | 1.66E-04 Zfat1 Zfp406             | 362925 |
| TGFBR2     | 1.289802    | 1.66E-04 TGF-beta 2 Tgfbr2T       | 81810  |
| POLR1C     | 0.42630336  | 1.67E-04 Ac2-127 Rpo1-1           | 301246 |
| PTER       | 1.0322663   | 1.69E-04 Rpr-1 Rpr1               | 63852  |
| CDYL2      | 0.95827675  | 1.69E-04                          | 292044 |
| AKAP7      | -0.7377203  | 1.69E-04 AKAP-18 AKAP18d Akap15 / | 361458 |
| EFNB3      | -0.5920111  | 1.69E-04 ELK-L3                   | 360546 |
| GIPC3      | 1.6110032   | 1.69E-04 RGD1563255               | 500789 |
| NOCT       | 0.5487951   | 1.74E-04 Ccr4 Ccrn4 Ccrn4lb       | 310395 |
| BCAS3      | -0.5178273  | 1.74E-04 RGD1560788               | 363662 |
| DAZAP1     | 0.45886728  | 1.75E-04                          | 362836 |
| MXI1       | -0.47463524 | 1.76E-04 MXI-WR                   | 25701  |
| HDAC5      | 0.48885363  | 1.77E-04                          | 84580  |
| MC5R       | 1.6079197   | 1.77E-04                          | 25726  |
| POMK       | -0.58920217 | 1.78E-04 RGD1310810 Sgk196        | 306549 |
| PODXL      | -0.6923312  | 1.78E-04 PC PCLP-1 podocalyxin    | 192181 |
| IRF6       | 1.2191257   | 1.82E-04                          | 364081 |
| PECAM1     | -1.3774275  | 1.82E-04 CD31 Pecam               | 29583  |
| TRPV6      | -0.93850434 | 1.82E-04 CaT1 Ecac2 Otrpc3        | 114246 |
| RGD1308117 | -0.9308683  | 1.82E-04                          | 361066 |
| ADAMTS2    | -1.2053839  | 1.84E-04 RGD1565950               | 287899 |
| TNFRSF12A  | 1.0359695   | 1.85E-04 Fn14                     | 302965 |
| ACOT3      | -0.62287575 | 1.85E-04 RGD1564089               | 314304 |
| MMP17      | 0.8486851   | 1.88E-04                          | 288626 |
| TMEM68     | -0.5819448  | 1.88E-04 RGD1309006               | 312946 |
| METTL13    | 0.46811473  | 1.89E-04 RGD1311526               | 289159 |
| GALNT16    | -0.53217185 | 1.91E-04 Galntl1                  | 362760 |
| DAB1       | 0.71107423  | 1.92E-04                          | 266729 |
| IL1RAP     | 0.9475349   | 2.00E-04 IL-1RAcp Il1racpb        | 25466  |
| ETV4       | 0.7502681   | 2.00E-04 Pea3                     | 360635 |
| PITX1      | 1.5863794   | 2.00E-04 Bft                      | 113983 |
| CLASP2     | -0.45628664 | 2.00E-04                          | 114514 |
| TADA2B     | 0.43645033  | 2.01E-04 ADA2B RGD1561605         | 289717 |
| LTBP1      | 0.91750896  | 2.01E-04                          | 59107  |

|          |             |          |                          |        |
|----------|-------------|----------|--------------------------|--------|
| DUSP26   | -0.6058669  | 2.02E-04 | RGD1310090               | 306527 |
| ADAMTS7  | -0.74705875 | 2.04E-04 | ADAMTS7B COMPase         | 315879 |
| FAIM2    | -0.72629684 | 2.05E-04 | Lfg NMP35                | 246274 |
| CYB5R1   | -0.7076814  | 2.05E-04 | Nqo3a2                   | 304805 |
| MEPE     | 1.3387411   | 2.06E-04 |                          | 79110  |
| PTPN1    | 0.64497983  | 2.07E-04 | Ptp                      | 24697  |
| TPM4     | 0.82039404  | 2.07E-04 | Tpm4.2 Tpm4.2cy          | 24852  |
| RGS2     | 0.7381537   | 2.08E-04 |                          | 84583  |
| TEX10    | 0.5948173   | 2.11E-04 |                          | 298065 |
| KCNB1    | 0.86163217  | 2.11E-04 | DRK1PC Kcr1-1 Kv2.1 Shab | 25736  |
| CBFB     | 0.6844125   | 2.12E-04 | Pebp2                    | 361391 |
| TP73     | 1.3698492   | 2.13E-04 | P73 Trp73                | 362675 |
| STAU1    | 0.3779561   | 2.14E-04 | Stau                     | 84496  |
| ARL14EP  | 0.7410797   | 2.14E-04 | ARF7EP RGD1311463        | 311279 |
| IGF2     | 1.5672538   | 2.17E-04 | IGFII RNIGF2             | 24483  |
| CDK19    | -0.5549146  | 2.17E-04 | Cdc2l6 Cdk11             | 309804 |
| LRRC59   | 0.4165463   | 2.20E-04 |                          | 287633 |
| RRS1     | 0.7456884   | 2.28E-04 |                          | 297784 |
| ANKRD12  | -0.6539705  | 2.30E-04 |                          | 316775 |
| LRRC4    | 0.68762976  | 2.31E-04 |                          | 641521 |
| RAB15    | 0.59578437  | 2.36E-04 |                          | 299156 |
| PPP2R3A  | -0.8871097  | 2.40E-04 |                          | 363122 |
| OS9      | -0.4035507  | 2.40E-04 | Os-9                     | 362891 |
| SEMA3E   | 0.8192995   | 2.40E-04 |                          | 296789 |
| CMAS     | -0.65439934 | 2.42E-04 |                          | 312826 |
| OPRD1    | 1.2956082   | 2.46E-04 |                          | 24613  |
| NLN      | 0.36868855  | 2.46E-04 |                          | 117041 |
| HSD11B1  | 1.0060592   | 2.47E-04 | LRRGT00065               | 25116  |
| MRRF     | -0.47376493 | 2.50E-04 |                          | 311903 |
| 42803    | -0.62812364 | 2.53E-04 | March-IX Rnf179          | 679272 |
| LRTM2    | -1.2352533  | 2.57E-04 |                          | 680883 |
| LHX2     | -0.7194863  | 2.57E-04 | LH2A Lh-2                | 296706 |
| GADD45A  | 0.8438053   | 2.60E-04 | Ddit1 Gadd45             | 25112  |
| PLCL2    | 0.49759674  | 2.67E-04 |                          | 301173 |
| UTP15    | 0.69488347  | 2.68E-04 | RGD1310992               | 310019 |
| PRUNE    | -0.5479131  | 2.71E-04 |                          | 310664 |
| SMOC2    | -1.477256   | 2.71E-04 |                          | 292401 |
| YARS     | 0.430864    | 2.71E-04 |                          | 313047 |
| RRP8     | 0.6214512   | 2.71E-04 | RGD1308302               | 308911 |
| ARHGAP31 | 1.1611425   | 2.71E-04 | Cdgap                    | 288093 |
| DESI1    | 0.42232907  | 2.72E-04 | DeSI-1 Fam152b Pppde2 RG | 315160 |
| RHEB     | 0.5235065   | 2.74E-04 |                          | 26954  |
| ASGR1    | 1.3252411   | 2.80E-04 | ASGR RATRHL1 RHL1        | 24210  |

|            |             |          |                     |           |
|------------|-------------|----------|---------------------|-----------|
| PFKP       | 0.4141759   | 2.84E-04 | ATP-PFK PFK-C PFK-P | 60416     |
| P4HA1      | 0.66392094  | 2.85E-04 | PHalpal             | 64475     |
| ARMC7      | -0.6029792  | 2.85E-04 | RGD1310043          | 287827    |
| SFMBT2     | 1.2059495   | 2.86E-04 |                     | 307106    |
| OSBPL6     | 0.9556358   | 2.87E-04 |                     | 311129    |
| USP20      | -0.5476291  | 2.93E-04 |                     | 311856    |
| ADAMTS15   | -0.94080544 | 2.93E-04 |                     | 300474    |
| CTDP1      | 0.4451366   | 2.93E-04 |                     | 291414    |
| ZW10       | 0.4267897   | 2.94E-04 |                     | 363059    |
| AP3S2      | -0.52299076 | 3.01E-04 |                     | 683402    |
| CDYL       | 0.79401857  | 3.01E-04 |                     | 361237    |
| E2F4       | 0.48663586  | 3.02E-04 |                     | 100360427 |
| NDRG1      | 0.6972355   | 3.02E-04 | Ndr1                | 299923    |
| PPM1H      | 0.7127094   | 3.03E-04 |                     | 314897    |
| NCOR2      | 0.8484824   | 3.11E-04 |                     | 360801    |
| NFATC1     | 0.7563985   | 3.12E-04 |                     | 100361818 |
| RGD1311164 | -0.46310118 | 3.15E-04 |                     | 297607    |
| SLC6A7     | -0.712864   | 3.28E-04 | Prot                | 117100    |
| NFRKB      | 0.6441671   | 3.31E-04 |                     | 315523    |
| ABHD6      | -0.4444501  | 3.32E-04 |                     | 305795    |
| KCND2      | -0.5871494  | 3.33E-04 | Kv4.2 RK5 Shal1     | 65180     |
| NRSN1      | 0.46664348  | 3.35E-04 | Vmp                 | 291129    |
| ADD3       | -0.5705513  | 3.37E-04 |                     | 25230     |
| CYB561     | -0.60420316 | 3.39E-04 |                     | 303601    |
| ELP2       | -0.41660187 | 3.39E-04 | Statip1             | 307545    |
| OSBPL1A    | -0.36456922 | 3.50E-04 |                     | 259221    |
| RGD1312005 | -0.9231772  | 3.50E-04 |                     | 291580    |
| AMIGO3     | 0.73918504  | 3.52E-04 |                     | 316003    |
| TEX264     | -0.50394505 | 3.53E-04 |                     | 300988    |
| SIRT5      | -0.6803784  | 3.54E-04 |                     | 306840    |
| ABCD1      | -0.59828013 | 3.59E-04 | RGD1562128          | 363516    |
| ATP13A3    | 0.7735666   | 3.59E-04 |                     | 678704    |
| ARFGAP3    | -0.45546272 | 3.60E-04 |                     | 503165    |
| RALGDS     | -0.51777    | 3.62E-04 | Rgds                | 29622     |
| ADGRE5     | 1.0853325   | 3.64E-04 | Cd97                | 361383    |
| CEBPA      | 0.7842719   | 3.67E-04 | DBPCEP              | 24252     |
| ATP5SL     | -0.4827523  | 3.72E-04 |                     | 361520    |
| IFT46      | -0.6445975  | 3.72E-04 | RGD1307682          | 300675    |
| YTHDF3     | 0.40102714  | 3.86E-04 |                     | 361920    |
| ESPNL      | 1.5138139   | 3.86E-04 | RGD1562432          | 301606    |
| NIP7       | 0.4737033   | 3.90E-04 | CGI-37 Nip7p pEachy | 192180    |
| LOC691141  | 1.0126132   | 3.96E-04 |                     | 691141    |
| BLOC1S6    | -0.54068834 | 4.01E-04 | Pldn                | 317630    |

|            |             |          |                         |        |
|------------|-------------|----------|-------------------------|--------|
| LRRC8B     | 1.0917848   | 4.03E-04 | RGD1563429              | 305135 |
| ECH1       | -0.6108725  | 4.03E-04 | Pxel                    | 64526  |
| KDM1A      | 0.36938342  | 4.03E-04 | Aof2 Kdm1 RGD1562975    | 500569 |
| DNASE2B    | 1.5245335   | 4.18E-04 | Dlad UOX                | 59296  |
| CYP11B2    | 1.5138268   | 4.25E-04 | Cp45as Cyp11b3 RNCP45AS | 24294  |
| SERTM1     | 0.830482    | 4.26E-04 |                         | 690333 |
| ANAPC2     | -0.45406723 | 4.37E-04 |                         | 296558 |
| CAND1      | 0.57176256  | 4.39E-04 | Tip120 Tip120A          | 117152 |
| FAM20B     | 0.37168434  | 4.45E-04 | RGD1311162              | 304885 |
| TCP11L2    | -0.7020828  | 4.48E-04 | RGD1307494              | 314683 |
| SRC        | 0.7262243   | 4.55E-04 |                         | 83805  |
| NEBL       | 0.81218123  | 4.55E-04 | Lasp-2                  | 307189 |
| TMIE       | -1.1572524  | 4.56E-04 | RGD1562523              | 501061 |
| QPCTL      | -0.47004032 | 4.56E-04 | RGD1308128              | 292687 |
| SERPINB7   | 1.505848    | 4.56E-04 | Megsin                  | 117092 |
| NOC4L      | 0.5610823   | 4.58E-04 | RGD1310661              | 360828 |
| HAGH       | -0.6924093  | 4.59E-04 | Glo2 RSP29              | 24439  |
| PCDHA2     | -0.5102854  | 4.59E-04 | rCNRv02                 | 393086 |
| TSPAN2     | -0.4740401  | 4.59E-04 | Tspan-2                 | 64521  |
| NRIP3      | 0.5417548   | 4.59E-04 |                         | 361625 |
| DSE        | 0.5761879   | 4.59E-04 | Sart2                   | 365583 |
| TRMT44     | 0.69999003  | 4.66E-04 | Mettl19 RGD1308380      | 305443 |
| PCDHA12    | -0.5639758  | 4.67E-04 | rCNRv12                 | 116779 |
| OXTR       | 1.3693583   | 4.69E-04 | OT-R OTR OTR1           | 25342  |
| ZBTB22     | -0.48097795 | 4.72E-04 | Bing1 Zfp297 Znf297     | 309630 |
| REM2       | 0.7931316   | 4.73E-04 |                         | 64626  |
| PRRT1      | -0.61716336 | 4.87E-04 | DSPD1 Ng5 Orf31         | 406167 |
| GRHL2      | 1.4127645   | 4.90E-04 | RGD1561191              | 299979 |
| RBBP5      | 0.38272616  | 4.91E-04 |                         | 304794 |
| CLK3       | 0.43377548  | 4.91E-04 |                         | 171305 |
| AGPAT5     | 0.37164775  | 4.95E-04 | RGD1306405              | 306582 |
| PRKX       | 0.47665304  | 4.96E-04 |                         | 501563 |
| BTA1F1     | 0.86330533  | 5.02E-04 | RGD1564130              | 368042 |
| PCSK4      | -1.0208651  | 5.09E-04 |                         | 171085 |
| MPPED1     | -0.6468225  | 5.10E-04 | RGD1308244              | 362971 |
| RGD1310110 | -0.6975931  | 5.15E-04 |                         | 361032 |
| DNAJC25    | 0.5981939   | 5.15E-04 |                         | 362526 |
| H2AFY2     | -0.4295681  | 5.20E-04 | RGD1561371              | 361844 |
| POLRMT     | 0.61828196  | 5.28E-04 |                         | 299604 |
| NACAD      | -0.5167076  | 5.31E-04 |                         | 289786 |
| PCSK5      | 0.6855457   | 5.31E-04 | PC6 Pc5                 | 116548 |
| STK17B     | 0.713867    | 5.33E-04 | Drak2                   | 170904 |
| ZFP36L2    | 0.57546765  | 5.41E-04 |                         | 298765 |

|            |             |                                      |        |
|------------|-------------|--------------------------------------|--------|
| RGD1305938 | -0.5517365  | 5.43E-04                             | 310362 |
| POLH       | 0.64425135  | 5.48E-04                             | 316235 |
| RBM14      | 0.50478554  | 5.49E-04 CoAA                        | 170900 |
| PLAGL1     | 0.6053042   | 5.49E-04 Lot1 Zac1                   | 25157  |
| MARK3      | 0.3763424   | 5.61E-04                             | 170577 |
| PCMTD2     | -0.57118213 | 5.62E-04 RGD1305684                  | 311726 |
| ZFP362     | -0.6280068  | 5.62E-04 RGD1306498                  | 297879 |
| HCN1       | 0.86012423  | 5.63E-04                             | 84390  |
| GPR21      | -0.44384855 | 5.65E-04 Gpr21                       | 311911 |
| GPR45      | -0.5449812  | 5.67E-04                             | 301372 |
| DBP        | -0.8268259  | 5.68E-04                             | 24309  |
| PCDHA6     | -0.50182587 | 5.68E-04 rCNRv06                     | 393088 |
| EMD        | 0.42466643  | 5.68E-04                             | 25437  |
| GPR156     | -1.0159905  | 5.73E-04 Gababl                      | 260430 |
| SLC48A1    | -0.3968802  | 5.78E-04 HRG-1 Hrg1                  | 300191 |
| PRKCZ      | -0.5678957  | 5.87E-04 14-3-3-zetaisoform PkcZ r14 | 25522  |
| FTSJ3      | 0.51962984  | 6.00E-04                             | 303608 |
| NMT2       | 0.43841127  | 6.07E-04                             | 291318 |
| CHRA1      | -0.6103794  | 6.09E-04                             | 315058 |
| HSPA2      | 0.5357155   | 6.14E-04 Hspt70 Hst70                | 60460  |
| TMEM86A    | -0.7264606  | 6.16E-04 RGD1305749                  | 308602 |
| SLC40A1    | 1.4047453   | 6.16E-04 Fpn1 Slc11a3 Slc39a1        | 170840 |
| SLC37A4    | -0.5257178  | 6.18E-04 G6pt1                       | 29573  |
| LOC500877  | -1.3927882  | 6.18E-04                             | 500877 |
| LINGO1     | 0.6413327   | 6.21E-04 Lrrn6a                      | 315691 |
| PRMT2      | -0.62597674 | 6.24E-04 Hrmt1l1                     | 499420 |
| SLC28A3    | -1.4889654  | 6.31E-04 Cnt3                        | 140944 |
| CAMK2N1    | 0.49420154  | 6.33E-04                             | 287005 |
| TMTC3      | 0.5425814   | 6.33E-04 RGD1306351                  | 314785 |
| TACR2      | 1.4816157   | 6.36E-04 Tac2r                       | 25007  |
| CITED4     | -1.242663   | 6.37E-04 MRG-2 Mrg2                  | 114491 |
| PRKRA      | -0.56349343 | 6.37E-04 RAX                         | 311130 |
| ABCB10     | -0.54307234 | 6.38E-04                             | 361439 |
| SEC24D     | 0.83843863  | 6.48E-04                             | 310843 |
| LEPROT     | -0.4193454  | 6.53E-04 Ob-Rgrp Obrgrp              | 56766  |
| PKLR       | -0.9121864  | 6.56E-04 PK1 PKL Pklg                | 24651  |
| NOC2L      | 0.3833833   | 6.76E-04 RGD1309387                  | 313777 |
| TTLL1      | -0.56456447 | 6.79E-04                             | 362969 |
| ZNRF2      | -0.70722926 | 6.85E-04 Znrf1                       | 362367 |
| RIT2       | -0.5996122  | 6.87E-04 Rin Rit1                    | 291713 |
| CALHM2     | -1.169739   | 6.87E-04 Fam26b RGD1308276           | 294019 |
| PNMAL2     | -0.50676274 | 6.95E-04 RGD1560435                  | 308393 |
| XPO4       | 0.72588956  | 6.95E-04                             | 290280 |

|         |             |          |                       |           |
|---------|-------------|----------|-----------------------|-----------|
| PACSIN3 | -0.63019615 | 6.97E-04 | Sdplll                | 311187    |
| SYNGR3  | -0.4901226  | 6.97E-04 |                       | 302975    |
| JRK     | 0.63231033  | 6.97E-04 |                       | 315073    |
| CALCRL  | 0.9037969   | 6.98E-04 | CLR Crlr RATCLR RNCLR | 25029     |
| CYHR1   | -0.8087888  | 6.99E-04 | RGD1561328            | 100362155 |
| KIF5B   | 0.42993933  | 6.99E-04 | Khc                   | 117550    |
| NFKBIE  | -0.7287623  | 7.15E-04 | Slc35b2               | 316241    |
| OSBPL2  | -0.37741908 | 7.17E-04 |                       | 296461    |
| PLEKHA5 | 0.5339661   | 7.17E-04 | Pepp2 TRS1            | 246237    |
| PDE10A  | 0.9542575   | 7.17E-04 | Pde10a3               | 63885     |
| STRADA  | -0.49474013 | 7.18E-04 | Lyk5                  | 303605    |
| RASAL2  | 0.9257782   | 7.19E-04 |                       | 304893    |
| BEND7   | 1.0420662   | 7.35E-04 | RGD1305898            | 361275    |
| PHC1    | 0.48105434  | 7.35E-04 |                       | 312690    |
| IGF2BP2 | 1.0324925   | 7.49E-04 | RGD1305614            | 303824    |
| TPK1    | -0.6448231  | 7.55E-04 |                       | 680668    |
| CHD6    | -0.6291748  | 7.64E-04 | CHD-6                 | 311607    |
| CHKA    | 0.42648286  | 7.71E-04 | CK-R Chk              | 29194     |
| TMUB2   | -0.3868561  | 7.73E-04 | RGD1304758            | 303567    |
| DOC2A   | -0.58669204 | 7.80E-04 |                       | 65031     |
| USP10   | 0.53595936  | 7.80E-04 |                       | 307905    |
| CTC1    | -0.45218167 | 7.83E-04 | RGD1563106            | 303238    |
| B3GNT2  | -0.6569873  | 7.84E-04 | B3gnt1                | 305571    |
| CCKAR   | -1.4610728  | 7.84E-04 | Cck-ar                | 24889     |
| OGDHL   | -0.44704428 | 7.85E-04 |                       | 290566    |
| NKD1    | -0.644302   | 7.96E-04 |                       | 364952    |
| PDE7B   | 0.7817121   | 8.00E-04 |                       | 140929    |
| PHF20   | -0.40930417 | 8.04E-04 | RGD1305020            | 311575    |
| ZC3H6   | -0.8585249  | 8.05E-04 | Zc3h6                 | 103690012 |
| FSD1    | -0.5281462  | 8.13E-04 |                       | 301506    |
| P2RY1   | -0.8910657  | 8.19E-04 | P2y P2y1              | 25265     |
| PURB    | 0.4570141   | 8.19E-04 | pur-beta              | 498407    |
| TMCC2   | -0.6654097  | 8.26E-04 | RGD1311960            | 305095    |
| ILVBL   | -0.6613915  | 8.34E-04 |                       | 362843    |
| CBFA2T3 | 0.8064325   | 8.46E-04 |                       | 361431    |
| TWIST1  | 1.1040758   | 8.48E-04 | Twist                 | 85489     |
| PHLPP1  | 0.5765138   | 8.52E-04 | Phlpp Plekhe1 Scop    | 59265     |
| PWP2    | 0.4914513   | 8.54E-04 |                       | 690297    |
| SHQ1    | 0.618061    | 8.56E-04 | RGD1310610            | 297483    |
| NCALD   | -0.3158198  | 8.67E-04 |                       | 553106    |
| TIGAR   | 0.42375776  | 8.67E-04 |                       | 502894    |
| BYSL    | 0.44311565  | 8.71E-04 |                       | 359727    |
| MLF1    | 0.7294841   | 8.72E-04 |                       | 310483    |

|          |             |             |                       |        |
|----------|-------------|-------------|-----------------------|--------|
| BHLHE23  | 1.2740167   | 8.75E-04    | Bhlhb4 RGD1559760     | 499952 |
| VAC14    | -0.38587335 | 8.80E-04    |                       | 307842 |
| KCTD6    | 0.4704236   | 8.86E-04    |                       | 305792 |
| MAD2L2   | -0.52181566 | 8.86E-04    |                       | 313702 |
| RNF4     | 0.43907994  | 8.86E-04    |                       | 29274  |
| TUSC5    | 1.3077588   | 8.86E-04    | DSPB1                 | 360576 |
| D2HGDH   | -0.7407282  | 9.03E-04    | RGD1307976            | 301624 |
| PPP1R21  | -0.44658285 | 9.11E-04    | RGD1565310            | 362697 |
| PIGW     | 0.58660764  | 9.11E-04    |                       | 378774 |
| SH3BP1   | 0.7184306   | 9.11E-04    |                       | 300067 |
| FOPNL    | -0.64248985 | 9.11E-04    | RGD1305823            | 360461 |
| RITA1    | -0.6617135  | 9.16E-04    | RGD1306772 Rita       | 288683 |
| DHX15    | 0.37572557  | 9.16E-04    |                       | 289693 |
| TXNRD1   | 0.43897274  | 9.16E-04    | Tr                    | 58819  |
| TRPM4    | -0.7388621  | 9.16E-04    | LTrpC-4 Mls2s         | 171143 |
| WNT7A    | -0.44404274 | 9.17E-04    |                       | 114850 |
| SLC24A4  | 0.65773785  | 9.17E-04    | Nckx4                 | 314396 |
| RBFA     | -0.6280929  | 9.22E-04    | RGD1311910            | 307235 |
| LIPA     | -0.48053014 | 9.24E-04    | Chole Chole2 LAL Lip1 | 25055  |
| BACH1    | 0.8233174   | 9.38E-04    |                       | 304127 |
| APEX2    | 0.5453076   | 9.39E-04    |                       | 317628 |
| SYT9     | -0.6798635  | 9.45E-04    | Sytv                  | 60564  |
| PCSK7    | 0.42560545  | 9.45E-04    | PC7                   | 29606  |
| DGCR8    | 0.3542616   | 9.58E-04    |                       | 287954 |
| ATP1A1   | 0.5371216   | 9.66E-04    | Nkaa1b                | 24211  |
| KLHL21   | 0.52049124  | 9.70E-04    | RGD1305863            | 313743 |
| DMTF1    | 0.74144053  | 9.78E-04    |                       | 114485 |
| PDK1     | 0.49384907  | 9.83E-04    |                       | 116551 |
| VLDLR    | 0.4947575   | 9.90E-04    |                       | 25696  |
| INPP5D   | 0.9800654   | 9.92E-04    |                       | 54259  |
| COASY    | -0.5244441  | 9.95E-04    |                       | 287711 |
| AATK     | -0.7821023  | 9.97E-04    |                       | 690853 |
| TFRC     | 0.6394503   | 0.001003031 | Trfr                  | 64678  |
| IVNS1ABP | 0.55952954  | 0.001011257 |                       | 289089 |
| FZD4     | 0.8261322   | 0.001014388 |                       | 64558  |
| MYOCD    | 1.4390517   | 0.001021537 | Mycd                  | 246297 |
| P2RX2    | -1.0103608  | 0.001063429 | P2X2                  | 114115 |
| WNT3     | -1.0721376  | 0.001075465 | INT4                  | 24882  |
| NGLY1    | -0.5888386  | 0.001078654 |                       | 361014 |
| DCAF4    | -0.5240574  | 0.001085269 | Wdr21                 | 362762 |
| SOX4     | -0.666895   | 0.001087743 |                       | 364712 |
| CDH15    | -1.0086491  | 0.00109044  |                       | 361432 |
| SHMT2    | 0.7363225   | 0.001096925 |                       | 299857 |

|              |             |             |                      |           |
|--------------|-------------|-------------|----------------------|-----------|
| NOP9         | 0.46830082  | 0.001098523 | RGD1308396           | 290235    |
| DIEXF        | 0.6520972   | 0.001115796 | Def                  | 305076    |
| XPO1         | 0.64450747  | 0.001121369 |                      | 85252     |
| CHD1         | 0.70372075  | 0.001121369 |                      | 308215    |
| OSBPL8       | 0.42345697  | 0.001121503 | RGD1561474           | 314824    |
| FRMD3        | -0.49199355 | 0.001123587 |                      | 298141    |
| IFT52        | -0.48374653 | 0.001123977 | RGD1311004           | 362265    |
| MMP16        | 0.7201553   | 0.001137568 | Mt3-mmp              | 65205     |
| NTF3         | -0.91430616 | 0.001137797 |                      | 81737     |
| UGCG         | -0.408513   | 0.001153735 |                      | 83626     |
| PPIF         | 0.4912731   | 0.001161996 | CyP-D CypD PPlase    | 282819    |
| ACAP1        | 0.87039363  | 0.001164913 | Centb1               | 287443    |
| LANCL2       | -0.40217626 | 0.001165692 |                      | 362375    |
| LOC100302465 | 1.327915    | 0.001170263 |                      | 100302465 |
| GPR176       | -0.6699465  | 0.001175242 | Gm1012 Gpr RBU-15    | 117257    |
| BORCS5       | -0.97918296 | 0.00118038  | Loh12cr1             | 362452    |
| TEAD1        | 1.1423496   | 0.001182609 | TEF-1                | 361630    |
| TMCC3        | 0.6989743   | 0.001187061 | RGD1307241           | 314751    |
| CCDC82       | -0.55604905 | 0.001195598 |                      | 300359    |
| KCNH3        | -0.70602757 | 0.001198509 | Bec1 Elk2            | 27150     |
| WSCD2        | -1.1164229  | 0.001199013 | Wscd2-ps1            | 360824    |
| EHD1         | -0.48566034 | 0.001199013 | RGD1306960           | 293692    |
| BNIP3        | -0.6796134  | 0.00120515  |                      | 84480     |
| STAMBP       | -0.60814065 | 0.001211643 | Amsh                 | 171565    |
| PTPDC1       | 0.50092864  | 0.001211643 |                      | 291022    |
| ANXA7        | 0.4737687   | 0.001220179 |                      | 155423    |
| NPY2R        | 1.174916    | 0.001229187 |                      | 66024     |
| TMEM106C     | -0.50079596 | 0.001229815 | RGD1311532           | 315286    |
| BRINP3       | -0.8265199  | 0.001230632 | Fam5c                | 286901    |
| PDCD6IP      | 0.46702114  | 0.001230632 | AIP1 Alix RGD1561176 | 501083    |
| NUDT18       | -0.6500521  | 0.001234377 | RGD1311802           | 361068    |
| SLC45A3      | -1.2641804  | 0.001236445 | RGD1309764           | 304785    |
| TRAPPC3      | -0.42669937 | 0.001236766 |                      | 362599    |
| HARS         | 0.37955672  | 0.001241341 | Dnd1                 | 307492    |
| SFPQ         | 0.59208065  | 0.001242321 |                      | 252855    |
| SPRTN        | 0.60773844  | 0.001254553 | RGD1559496           | 292101    |
| LRRC16B      | -0.5078315  | 0.001264088 | Lrrc16b              | 361041    |
| RAB9B        | -0.56710654 | 0.001279833 | RGD1562951           | 367915    |
| OLFM4        | 0.9606124   | 0.001293636 |                      | 290409    |
| NUP93        | 0.45545802  | 0.001306387 |                      | 291874    |
| ING1         | 0.40621704  | 0.001317824 | p33ING1b p33ING1c    | 306626    |
| KCNK3        | 0.85008407  | 0.001321135 | Task-1 rTASK         | 29553     |
| CYSRT1       | -1.1947086  | 0.001322035 | RGD1560880           | 499747    |



|            |             |             |                        |        |
|------------|-------------|-------------|------------------------|--------|
| MMP15      | 0.5081275   | 0.00132987  |                        | 291848 |
| NXF1       | 0.5484511   | 0.001358358 | Mex67h Tap             | 59087  |
| URI1       | -0.58499944 | 0.001370479 | RGD1310358             | 308537 |
| WDSUB1     | -0.56799155 | 0.001376847 |                        | 362137 |
| CEP295     | 0.6915539   | 0.001376847 | RGD1311723             | 363018 |
| PSTPIP2    | 0.85054135  | 0.001378867 | RGD1563090             | 307248 |
| FUCA2      | -0.77564716 | 0.001382232 |                        | 292485 |
| SULT2B1    | -0.75320095 | 0.001387261 | ST2B1                  | 292915 |
| BCL2L13    | 0.55887043  | 0.001388408 |                        | 312682 |
| ASAP1      | 0.8193613   | 0.001390398 | Ddef1                  | 314961 |
| EML5       | 0.90218073  | 0.001393962 |                        | 444982 |
| RNF6       | 0.40930188  | 0.00139603  |                        | 304271 |
| SERINC2    | 0.8296205   | 0.001399499 | Tde2l                  | 313057 |
| NAA25      | 0.5468156   | 0.001402575 | LRRGT00164 Mdm20 RGD13 | 360811 |
| AGK        | -0.46472198 | 0.001407379 | RGD1562046             | 502749 |
| TOR1AIP1   | 0.45769244  | 0.001441091 | Lap1b Lap1c            | 246314 |
| ANKRD13D   | -0.5459929  | 0.001462133 | RGD1309156             | 361699 |
| DIRC2      | -0.5177993  | 0.001462133 |                        | 303902 |
| HPCAL4     | -0.65064806 | 0.001465978 | NVP-2 Nvjp2            | 50872  |
| NPAP60     | 0.37747714  | 0.001465978 | Nup50 Rtp60            | 25497  |
| TNIP1      | -0.5493757  | 0.001474619 |                        | 363599 |
| SPAST      | -0.37951675 | 0.001488689 | Spg4                   | 362700 |
| BCORL1     | -0.75904447 | 0.001489755 | RGD1566108             | 302810 |
| HMGCR      | 0.49033245  | 0.001514448 | 3H3M                   | 25675  |
| MYLIP      | 0.5107507   | 0.001516362 | MIR                    | 306825 |
| RNF112     | -0.5731631  | 0.001517352 | BFP Bfb Zfp179 Znf179  | 24916  |
| PLA2G4A    | 1.1080424   | 0.001519433 | Pla2c Pla2g4 cPLA2     | 24653  |
| RRAGA      | 0.5169129   | 0.00152748  | Raga                   | 117044 |
| 42796      | -0.45689023 | 0.00153112  | MARCH-II RGD1306395    | 362849 |
| FAM217B    | -0.88913196 | 0.001552614 | RGD1311952             | 311692 |
| SYT3       | -0.7124081  | 0.00156439  | SIII                   | 25731  |
| ZFP672     | 0.51476556  | 0.00156439  | Znf672                 | 303165 |
| IMPDH1     | -0.459075   | 0.001573219 | IMPD 1 IMPDH 1         | 362329 |
| TVP23A     | -0.81732684 | 0.001580614 | Fam18a RGD1566405      | 360467 |
| KIFAP3     | -0.34634274 | 0.001587511 |                        | 289168 |
| RAB27A     | -0.86322165 | 0.001593067 | ram                    | 50645  |
| RBM18      | 0.33643258  | 0.001593067 |                        | 311902 |
| GLUL       | 0.38647527  | 0.001595521 | Glns                   | 24957  |
| PXN        | 0.6410701   | 0.001595521 |                        | 360820 |
| DEPDC1B    | 0.5622565   | 0.001595577 |                        | 310074 |
| CYB561D2   | -0.57080746 | 0.001609138 |                        | 363137 |
| RGD1559896 | -0.34047088 | 0.001613119 |                        | 498967 |
| CD55       | -0.96448857 | 0.001613967 | Daf Daf1               | 64036  |

|          |             |             |                           |        |
|----------|-------------|-------------|---------------------------|--------|
| NDST3    | 1.1187375   | 0.001627725 |                           | 295430 |
| YPEL3    | -0.76707417 | 0.001634564 | RGD1564579                | 293491 |
| DIS3     | 0.6484738   | 0.001654481 | RGD1304646                | 306103 |
| PLXND1   | -0.66652536 | 0.001662025 |                           | 312652 |
| AHCYL2   | 0.5672737   | 0.001666295 | RGD1564895                | 312192 |
| LSM10    | -0.5304686  | 0.001670468 |                           | 366468 |
| ZFP523   | -0.43426538 | 0.001670468 | Znf76                     | 361809 |
| BCL11A   | -0.89537686 | 0.001678072 |                           | 305589 |
| CLK2     | 0.4075584   | 0.001678072 |                           | 365842 |
| GLI2     | 1.040282    | 0.001678072 |                           | 304729 |
| NCBP3    | 0.48621503  | 0.001684382 | RGD1308139                | 360563 |
| RAB3GAP2 | 0.56497294  | 0.001684382 | RGD1311518                | 289350 |
| ZFP295   | 0.62897     | 0.001685243 | Znf295                    | 304056 |
| MAP3K7   | 0.41928765  | 0.001690861 | Tak1                      | 313121 |
| NEUROD4  | -1.0769848  | 0.001694129 |                           | 288821 |
| SYT4     | 0.5085085   | 0.001725132 |                           | 64440  |
| FNDC3A   | 0.80316854  | 0.001731631 | Fndc3                     | 306022 |
| HTR7     | 0.8087953   | 0.001731631 | 5Ht7                      | 65032  |
| TAF1A    | 0.46075687  | 0.001742467 |                           | 360893 |
| ZMYND8   | -0.4993775  | 0.001744596 | Prkcbp1 spikar            | 296374 |
| RQCD1    | 0.35330376  | 0.001749681 | Rqcd1                     | 301513 |
| LDAH     | -0.34138876 | 0.001750941 | RGD1311648                | 313949 |
| CYP39A1  | -0.94485986 | 0.001756238 |                           | 301264 |
| ACPP     | 1.3829361   | 0.001760973 | 5'-NT Acpp11 FRAP Ppal RN | 56780  |
| AZIN1    | 0.5310784   | 0.001783718 | Oazi Oazin                | 58961  |
| SEMA3C   | 0.5066261   | 0.001806473 |                           | 296787 |
| CARNMT1  | 0.6264513   | 0.001806898 | RGD1311863                | 293871 |
| SLC27A3  | -0.43738768 | 0.001808057 |                           | 295219 |
| GOLGA7B  | 0.6574997   | 0.001808057 |                           | 309378 |
| SIPA1L2  | 0.5657982   | 0.00181921  | Sersap2 Spar2             | 361442 |
| APLF     | -0.669483   | 0.001822101 | RGD1565557                | 500247 |
| NFIX     | -0.61413676 | 0.001822101 | Nfix                      | 81524  |
| MRPL10   | -0.44270423 | 0.001824196 | L10mt MRP-L10 MRP-L8      | 691075 |
| ZBTB24   | 0.49677444  | 0.001824461 | Bif1a ZNF450              | 365590 |
| SMARCD3  | -0.60978127 | 0.001829849 |                           | 296732 |
| GALK2    | -0.5638727  | 0.001834044 |                           | 296117 |
| SMARCA5  | 0.6474431   | 0.001834044 |                           | 307766 |
| TXNDC11  | 0.35675973  | 0.001842396 | RGD1307538                | 302899 |
| TBC1D9   | -0.5926496  | 0.001843215 | RGD1308221                | 304645 |
| TPH1     | 1.3470098   | 0.001868024 | Tph                       | 24848  |
| PNMA1    | -1.1105555  | 0.001874523 | MA1                       | 170636 |
| JAKMIP1  | -0.7710171  | 0.001885091 | Marlin-1 Marlin1          | 305434 |
| ARPP21   | 0.4453368   | 0.001891512 | Arpp-21 Ppp1r1c Ppp1r1c F | 363153 |

|           |             |             |                          |        |
|-----------|-------------|-------------|--------------------------|--------|
| KCNMB2    | 0.95317215  | 0.001892463 | Kcmb2                    | 294961 |
| MAP2K5    | -0.37010694 | 0.001892602 | Mek5                     | 29568  |
| STC2      | 0.84162474  | 0.001892602 |                          | 63878  |
| NKIRAS2   | -0.44531527 | 0.00191021  |                          | 287707 |
| SLC20A1   | 0.6861232   | 0.00191021  | PiT-1                    | 81826  |
| RNF128    | 0.62710315  | 0.001913067 | RGD1566282               | 315911 |
| PCDHA7    | -0.47689474 | 0.00191786  | rCNRv07                  | 393089 |
| SPOP      | -0.542691   | 0.00194976  |                          | 287643 |
| TRPC1     | -0.52421254 | 0.001959578 | Trrp1                    | 89821  |
| MYO19     | 0.7242043   | 0.001980904 | RGD1559961               | 497974 |
| FBXO41    | -0.82166547 | 0.001982358 | RGD1566130               | 312504 |
| GALE      | -0.53963566 | 0.001982854 |                          | 114860 |
| NAGA      | -0.41248217 | 0.00198457  |                          | 315165 |
| KCND1     | -0.6402698  | 0.001986341 | Kv4.1                    | 116695 |
| SERPINB8  | 1.3687408   | 0.002010378 |                          | 288937 |
| ZFP36     | 0.76764697  | 0.002015744 | Tis11                    | 79426  |
| TBC1D8    | -0.4443501  | 0.00201678  |                          | 680133 |
| PDZD8     | 0.5937467   | 0.002042684 | Pdzk8                    | 308000 |
| ALYREF    | 0.62773097  | 0.002062709 | Thoc4                    | 690585 |
| EXO1      | 0.76198125  | 0.002064636 |                          | 305000 |
| FADS6     | -0.6694298  | 0.002069547 | RGD1311950               | 303671 |
| PTP4A3    | -0.6268247  | 0.002074878 |                          | 362930 |
| PPEF1     | -0.81774217 | 0.002097266 |                          | 317498 |
| NEIL1     | -0.71396124 | 0.002099288 |                          | 367090 |
| PIK3R1    | -0.64042646 | 0.002099413 | PI3KA                    | 25513  |
| DARS2     | -0.48116833 | 0.002103762 | RGD1308286               | 304919 |
| MED9      | -0.56644887 | 0.002105041 | RGD1563669               | 497914 |
| BRIX1     | 0.48678407  | 0.002134174 | Bxdc2 RGD1308508         | 294799 |
| ETNK2     | -0.7629403  | 0.002158593 | EKI 2                    | 360843 |
| ADM       | 0.98095083  | 0.002187922 | Ap H39316 RATAP          | 25026  |
| LOC688452 | 0.7606615   | 0.002189862 | Spaca6                   | 688452 |
| SENP2     | 0.5625889   | 0.002194873 | Axam                     | 78973  |
| CHAF1B    | 0.49415588  | 0.002200997 |                          | 288242 |
| API5      | 0.39791232  | 0.002205337 |                          | 362170 |
| RUNX1T1   | -0.83150077 | 0.002217144 | Cbfa2t1                  | 362489 |
| CARS2     | -0.49256566 | 0.002218968 | RGD1311612               | 361184 |
| SIN3A     | -0.43387488 | 0.002218968 |                          | 363067 |
| MBLAC2    | -0.6480122  | 0.002231585 | RGD1306703               | 365627 |
| CAT       | -0.39946076 | 0.002231585 | CS1 Cas1 Cat01 Catl Cs-1 | 24248  |
| ESR1      | 1.1407906   | 0.002235185 | ER-alpha Esr RNESTROR    | 24890  |
| DDX51     | 0.43235165  | 0.002315611 |                          | 304570 |
| SFRP4     | 1.0897659   | 0.002315611 |                          | 89803  |
| NDRG4     | -0.48663014 | 0.002326731 | Bdm1 Ndr4 smap8          | 64457  |

|            |             |             |                    |           |
|------------|-------------|-------------|--------------------|-----------|
| INIP       | 0.49384215  | 0.002329927 | RGD1307983         | 298032    |
| FSCN3      | 1.01676     | 0.002329927 |                    | 296947    |
| GRIP2      | -0.678192   | 0.002331911 | Abp                | 171571    |
| IGF1       | 1.2108998   | 0.002331911 |                    | 24482     |
| XKR4       | -0.59722596 | 0.002337273 | XRG4               | 297801    |
| VAT1       | -0.4805402  | 0.00235633  |                    | 287721    |
| ST6GALNAC6 | -0.46399876 | 0.00235633  | Siat7F             | 407765    |
| SLC44A2    | -0.44919485 | 0.00235633  | RGD1309680         | 363024    |
| SLC24A3    | 0.5326149   | 0.00235633  | Nckx3              | 85267     |
| ORC1       | 0.9550075   | 0.00235633  | Orc1l              | 313479    |
| NDST4      | -1.3208786  | 0.00235929  |                    | 362035    |
| RNF219     | 0.35777017  | 0.002367857 | RGD1564706         | 361088    |
| MCM4       | 0.64696366  | 0.002370721 | Mcnd4              | 29728     |
| PCDHA4     | -0.38769412 | 0.002405588 | Cnr1               | 116741    |
| RIT1       | -0.36586645 | 0.00246091  | RGD1559874         | 499652    |
| RIIAD1     | 1.0830668   | 0.002471164 |                    | 100270669 |
| ZMYND10    | -0.7166203  | 0.002474723 |                    | 363139    |
| MYBBP1A    | 0.6370758   | 0.002480002 | DBP                | 60571     |
| GTF3C5     | -0.38180616 | 0.002491373 |                    | 362095    |
| ACTL6A     | 0.40495035  | 0.002514606 | RGD1307747         | 361925    |
| NKX3-1     | 1.2755096   | 0.002515555 |                    | 305999    |
| DISP2      | -0.6134049  | 0.002556581 |                    | 311324    |
| ARFGAP2    | 0.383457    | 0.002566636 | Zfp289             | 362162    |
| NDEL1      | 0.4134144   | 0.002567926 | NUDE2 Nudel        | 170845    |
| SPRED1     | 0.8288227   | 0.002567926 |                    | 296072    |
| PELI3      | -0.749179   | 0.002570655 | RGD1305989         | 309157    |
| CDO1       | -0.601678   | 0.002577847 |                    | 81718     |
| SLC25A32   | 0.49625838  | 0.002578091 | RGD1565789         | 315023    |
| SLC6A8     | 0.570552    | 0.002578091 | CHOT1 CHT1 CRT CT1 | 50690     |
| ROR2       | 0.6379546   | 0.002579488 |                    | 306782    |
| NFXL1      | 0.7204357   | 0.002600309 | RGD1359201         | 289595    |
| NPLOC4     | 0.5224384   | 0.002606698 | Npl4               | 140639    |
| SLC25A42   | -0.4402367  | 0.002609801 |                    | 689414    |
| MFAP2      | -0.44396982 | 0.002639372 |                    | 313662    |
| TTC19      | 0.5083155   | 0.002639372 | RGD1311797         | 691506    |
| GPATCH2    | 0.6533226   | 0.002639372 | Gpatc2             | 289362    |
| LEMD3      | 0.40933073  | 0.002642271 | RGD1561001         | 680066    |
| RFXAP      | 0.61888963  | 0.002650466 |                    | 499617    |
| MCOLN3     | 1.2846128   | 0.002662769 |                    | 308022    |
| PLPPR4     | 0.4323068   | 0.002678223 | Lppr4 Prg-1 Prg1   | 295401    |
| VPS37D     | -0.67426366 | 0.002682377 |                    | 687208    |
| ASUN       | 0.42108116  | 0.002704072 |                    | 690728    |
| PKD2       | -0.44153845 | 0.002713821 |                    | 81530     |

|           |             |             |                           |           |
|-----------|-------------|-------------|---------------------------|-----------|
| ZFP395    | -0.49914    | 0.002722246 |                           | 305972    |
| CLDN3     | -1.327775   | 0.002735947 |                           | 65130     |
| SV2C      | 1.3235396   | 0.002735947 |                           | 29643     |
| MAFF      | 0.6750922   | 0.002736387 |                           | 366960    |
| FKBP1A    | 0.31115192  | 0.002739557 | FKBP12 Fkbp2              | 25639     |
| ITPR3     | 1.1131233   | 0.002747432 | IP3R3 IP3R3X              | 25679     |
| CYP11B3   | 1.2890716   | 0.002758251 | CYPXIB3                   | 353498    |
| ZBTB16    | -1.1543972  | 0.002766361 | Lx Plzf Zfp145 Znf145     | 353227    |
| BPHL      | -0.57253987 | 0.002774489 |                           | 361239    |
| HNRNPF    | 0.6241387   | 0.002774495 | Hnrpf                     | 64200     |
| ZFP18     | 0.42917475  | 0.002779537 | Zfp535 Zkscan6 Znf18      | 303226    |
| HPN       | 1.3208531   | 0.002788    |                           | 29135     |
| B4GALNT4  | -0.4399508  | 0.002813124 | RGD1310052                | 309105    |
| HERC3     | -0.5670623  | 0.002856638 |                           | 362377    |
| SLC30A10  | 0.7927553   | 0.002856638 | RGD1305098                | 289353    |
| SLC35B4   | -0.37633476 | 0.002863239 |                           | 296969    |
| ATAD3A    | 0.32929096  | 0.002863239 | Atad3                     | 298682    |
| TBCK      | -0.3988576  | 0.002872885 | RGD1307816 Tbckl          | 295446    |
| NOL3      | -0.4864958  | 0.002873274 | Arc                       | 85383     |
| NIFK      | 0.5546444   | 0.002931919 | Mki67ip                   | 246042    |
| OPRK1     | -1.2661084  | 0.002945226 |                           | 29335     |
| LRRC75B   | -0.89601713 | 0.002945226 | Fam211b                   | 100365744 |
| TBC1D25   | -0.5088058  | 0.002945226 | Oat1 RGD1559711           | 302552    |
| EEA1      | 0.5295778   | 0.002949305 |                           | 314764    |
| BRINP1    | 0.58867437  | 0.002951721 | Dbc1 Dbccr1               | 140610    |
| SPTLC1    | 0.39000693  | 0.00295267  | Lcb1 RGD1306617 Spt1      | 361213    |
| ARL4D     | 0.7306127   | 0.00295267  | Arf4l                     | 303559    |
| HGS       | 0.36550793  | 0.002959091 | Hrs                       | 56084     |
| FAM26F    | 1.3035073   | 0.002999965 | RGD1304835                | 294430    |
| ANO6      | 0.74228007  | 0.003006419 | Tmem16f                   | 315272    |
| LOC361346 | 0.6765565   | 0.003009195 | Las2                      | 361346    |
| RIMS4     | 0.9382637   | 0.003045795 | Rim4gamma                 | 266976    |
| PSMB11    | 1.047436    | 0.003048026 | RGD1308773                | 290206    |
| SEC24B    | 0.36643368  | 0.003058924 |                           | 295461    |
| NMBR      | 1.0635699   | 0.00308967  | NMB-R                     | 25264     |
| HNRNPU    | 0.44230294  | 0.003123493 | Hnrpu SN1                 | 117280    |
| RBPJ      | 0.64910966  | 0.003143098 |                           | 679028    |
| WDR6      | -0.50963014 | 0.003184359 |                           | 301007    |
| SLC12A6   | -0.7204348  | 0.00319381  | Kcc3                      | 691209    |
| CIR1      | -0.8313745  | 0.003194235 | 1700023b02rik Cir RGD1309 | 362149    |
| ATRAID    | -0.5178097  | 0.003194644 | RGD1311605                | 298841    |
| DCAKD     | -0.30305466 | 0.003211073 |                           | 360639    |
| DND1      | 1.0508786   | 0.003215087 |                           | 679841    |

|         |             |             |                     |        |
|---------|-------------|-------------|---------------------|--------|
| LCK     | -0.7098316  | 0.003231213 | Lck1 Lcktkr         | 313050 |
| NR1D1   | -0.4220045  | 0.003231213 | REV-ERBAALPHA       | 252917 |
| RSRP1   | -0.39317167 | 0.003245802 | RGD1359529          | 362626 |
| FBL     | 0.6051908   | 0.003247209 |                     | 292747 |
| BBS2    | -0.5848547  | 0.003267711 |                     | 113948 |
| ZFP639  | 0.4032127   | 0.003267711 | Znf639              | 683504 |
| MRPS2   | 0.35226396  | 0.003272506 |                     | 362094 |
| CDK18   | -1.0914624  | 0.003274151 | PCTAIRE3 Pctk3      | 289019 |
| FAM222B | 0.5397364   | 0.003284344 | RGD1566149          | 497960 |
| DYNC1I1 | -0.30571437 | 0.003284492 | Dnci1 Dncic1        | 29564  |
| ENGASE  | -0.6188538  | 0.003294754 | RGD1310868          | 303702 |
| PCBP4   | -0.31813145 | 0.003294754 |                     | 363133 |
| CHSY1   | 0.3295991   | 0.003300143 |                     | 292999 |
| SCN4A   | -1.1988186  | 0.003331173 | NCHVS Nav1.4 microl | 25722  |
| ZFP800  | 0.69300103  | 0.003331173 | RGD1560157          | 500057 |
| TMEM87B | 0.45328468  | 0.003332206 | RGD1307907          | 362212 |
| PPP1R10 | 0.43675312  | 0.003333753 | Fb19 Pnuts          | 65045  |
| ZFYVE19 | -0.47516018 | 0.003340885 |                     | 499871 |
| FN3K    | -1.18426    | 0.003346953 | Fnsk                | 498034 |
| MYCN    | -0.46250296 | 0.003346953 | N-myc Nmuc1 Nmyc    | 298894 |
| MON2    | 0.66772544  | 0.003356609 | RGD1308808          | 314894 |
| EMILIN3 | 1.0215374   | 0.003366859 |                     | 362262 |
| SLC30A2 | -1.2455347  | 0.003374921 | ZnT-2 Znt2          | 25362  |
| PURG    | 0.5889565   | 0.003383831 |                     | 361162 |
| PTGIR   | 1.2722929   | 0.003413173 |                     | 292661 |
| FSTL5   | -0.35508668 | 0.003419268 |                     | 365823 |
| FCHO1   | -0.44358185 | 0.003452883 |                     | 290639 |
| CHMP1A  | -0.41559383 | 0.003452883 | Pcoln3              | 365024 |
| EMP3    | 1.2313905   | 0.003452986 |                     | 81505  |
| RPS6KA6 | 0.47431427  | 0.00346415  | RGD1560817          | 317203 |
| NPAS2   | 0.5455637   | 0.00346415  |                     | 316351 |
| SHD     | -0.56852055 | 0.00346793  |                     | 316507 |
| ELOVL4  | 0.3928217   | 0.003474993 |                     | 315851 |
| HMGCL   | -0.47724962 | 0.003477131 |                     | 79238  |
| JUP     | -0.6522347  | 0.003483449 |                     | 81679  |
| MFN1    | 0.42748147  | 0.003500277 | Fzo1b               | 192647 |
| SLC2A8  | -0.49465877 | 0.003501701 | Glut8               | 85256  |
| ZDHHC20 | 0.5142524   | 0.003510928 | RGD1305755          | 305923 |
| CCDC32  | -0.6085224  | 0.003520041 | Gm631               | 296081 |
| ZBP2    | -1.0296645  | 0.003535947 |                     | 363676 |
| FADD    | 0.8071368   | 0.003547048 | Mort1               | 266610 |
| FBXO30  | -0.5166577  | 0.003554638 |                     | 308283 |
| MTPAP   | 0.4852335   | 0.003593015 | Papd1               | 307050 |

|              |             |             |                          |           |
|--------------|-------------|-------------|--------------------------|-----------|
| FOXP2        | -0.6970624  | 0.003596837 | RGD1559697               | 500037    |
| LOC100125367 | 0.70325047  | 0.003596837 | C1orf74                  | 100125367 |
| OSCAR        | 1.1101156   | 0.003609305 | RGD1559897               | 292537    |
| KCNA4        | 0.64054894  | 0.003625348 | KCHAN Kv1.4 Kv4 RHK1 RK  | 25469     |
| FAM129C      | -0.9176881  | 0.00363949  |                          | 498604    |
| NAT14        | -0.5717621  | 0.00363949  | RGD1565991 Zfp628        | 361500    |
| SMIM17       | -0.68858564 | 0.003641049 | RGD1559613               | 499067    |
| AKAP9        | -0.52254903 | 0.003653498 | CG-NAP Gisp Yotiao       | 246150    |
| ORC2         | 0.6520922   | 0.003659118 | Orc2l                    | 301430    |
| BCKDHA       | -0.4117469  | 0.003673959 | BCKDA E1a                | 25244     |
| RNF139       | 0.37509334  | 0.003691356 | TRC8                     | 315000    |
| DNAAF5       | 0.6442604   | 0.003704938 | Heatr2                   | 304332    |
| APBB3        | -0.45330966 | 0.003707689 | Fe65l2                   | 117026    |
| TYMS         | 0.58960056  | 0.003712491 |                          | 29261     |
| PXYLP1       | -0.49903175 | 0.003724332 | Acpl2                    | 315939    |
| DTX2         | 0.49222773  | 0.003763813 |                          | 304591    |
| ZFAND6       | -0.3773252  | 0.003771226 | Za20d3 zgc:101121        | 293067    |
| REEP2        | -0.35044065 | 0.003773972 |                          | 682105    |
| N4BP3        | -0.7732296  | 0.003786323 | C330016o10rik RGD1308356 | 303112    |
| CCDC28B      | -0.6469193  | 0.003786323 |                          | 682445    |
| RPS6KB2      | 0.38501665  | 0.003795693 |                          | 361696    |
| RGS14        | -0.69307476 | 0.003797186 |                          | 114705    |
| PUS7         | 0.67190504  | 0.003797186 | RGD1307054               | 296751    |
| RANGAP1      | 0.41167435  | 0.003804426 |                          | 362965    |
| LRCH1        | 0.58920455  | 0.003804426 |                          | 502020    |
| TENM3        | -0.6950083  | 0.003808736 | Odz3                     | 306451    |
| TFAP4        | -0.67507505 | 0.003827042 | Tcfap4                   | 360482    |
| TBK1         | 0.40808332  | 0.003830434 |                          | 299827    |
| TMEM223      | -0.5691301  | 0.003839845 |                          | 690285    |
| IFT81        | -0.6005608  | 0.003870222 | Cdv-1 Cdv1               | 373066    |
| ITSN1        | 0.6095012   | 0.003875809 | Itsn                     | 29491     |
| FOXO3        | -0.89672095 | 0.003884692 | Fkhr1 Foxo3a             | 294515    |
| PPP4R3A      | 0.38124272  | 0.003885117 | RGD1309059 Smek1         | 314388    |
| CSRP2        | -0.6035509  | 0.003912169 | SmLIM                    | 29317     |
| RGD1308147   | 0.37867263  | 0.003940911 |                          | 307008    |
| WNT9A        | -0.85681874 | 0.003952992 |                          | 287357    |
| POLR3E       | 0.34231988  | 0.003956293 | RGD1308086               | 361640    |
| TBC1D14      | -0.4229025  | 0.003971899 | SRF-2 UR-NR#2            | 360956    |
| NCS1         | 0.49619532  | 0.003984428 | Freq                     | 65153     |
| KTI12        | 0.5730082   | 0.003994137 |                          | 685656    |
| NRSN2        | -0.8531885  | 0.003997315 |                          | 689978    |
| CISD2        | 0.42032087  | 0.004040704 | RGD1566242               | 295457    |
| RHOQ         | 0.6162784   | 0.004042533 | Tc10                     | 85428     |

|            |             |             |                     |        |
|------------|-------------|-------------|---------------------|--------|
| SDE2       | 0.3299553   | 0.004044133 | RGD1305572          | 289315 |
| PHOSPHO2   | 0.3698227   | 0.004055211 |                     | 295663 |
| BNIP3L     | -0.42774191 | 0.004081985 | Nix                 | 140923 |
| RBBP7      | 0.4944776   | 0.004090612 |                     | 83712  |
| GRIN3B     | 0.5486226   | 0.004097416 | GluN3B NMDAR3B NR3B | 170796 |
| GEMIN5     | 0.62930375  | 0.004097416 |                     | 691231 |
| CDC16      | 0.28580996  | 0.004109758 |                     | 290875 |
| GPATCH11   | 0.39006427  | 0.004110932 | Ccdc75 RGD1311424   | 362685 |
| SLC5A4     | -1.2244954  | 0.00411264  | Slc5a4a             | 294341 |
| RGD1564804 | -0.6460024  | 0.004115207 |                     | 313551 |
| FN3KRP     | -0.46802858 | 0.004123667 | RGD1304570          | 303755 |
| UBE2F      | 0.41229182  | 0.004123667 | RGD1307608          | 363284 |
| AMZ2       | -0.40870693 | 0.004130729 | RGD1304846          | 360650 |
| SLC9B2     | -0.7989277  | 0.004135514 | Nhedc2              | 679958 |
| SUN1       | 0.59840167  | 0.004141931 | Unc84a              | 360773 |
| SLC25A39   | -0.4051778  | 0.004168978 | RGD1306193          | 360636 |
| ATF1       | 0.51113796  | 0.004168978 | Atf-1               | 315305 |
| SPATA5L1   | 0.5796718   | 0.004168978 |                     | 691729 |
| IDH1       | -0.4401083  | 0.004169217 |                     | 24479  |
| UBE2D3     | 0.3849438   | 0.004222871 |                     | 81920  |
| EML1       | -0.66444993 | 0.004228776 |                     | 362783 |
| PRPF18     | -0.37852702 | 0.004251674 | KCRF Pprf18         | 171552 |
| ACSL1      | 0.34920642  | 0.004251674 | ACS Acas COAA FacI2 | 25288  |
| LAMC1      | 0.7354476   | 0.004274136 | B2e                 | 117036 |
| NAPEPLD    | 0.77145904  | 0.004277008 | NAPE-PLD            | 296757 |
| DDX52      | 0.5531235   | 0.004299835 | Rok1                | 85432  |
| ULK2       | -0.33573863 | 0.004315719 |                     | 303206 |
| SH3GLB1    | 0.4935133   | 0.004339478 |                     | 292156 |
| CEBPG      | 0.5350657   | 0.004339478 | C/EBP CEBPRNA       | 25301  |
| ABHD8      | -0.7104634  | 0.004342752 |                     | 306338 |
| SYT6       | 0.79413813  | 0.004346998 |                     | 60565  |
| RECK       | 0.7344724   | 0.004355526 |                     | 313488 |
| MPLKIP     | 0.4674159   | 0.004360512 |                     | 684996 |
| PCDHA10    | -0.61110485 | 0.004377054 | rCNRv10             | 116778 |
| ELK3       | 0.551439    | 0.004377054 |                     | 362871 |
| NEPRO      | 0.6178104   | 0.004377054 | RGD1311458          | 303948 |
| SLC5A3     | 1.0699618   | 0.004377054 | Smit                | 114507 |
| TUBB4B     | 0.28440395  | 0.004377083 | Tubb2 Tubb2c        | 296554 |
| PLEKHA4    | -0.593785   | 0.004413514 |                     | 308584 |
| MCMBP      | 0.49211955  | 0.004427683 | MCM-BP RGD1306730   | 309009 |
| TJP3       | -0.85026395 | 0.00444724  |                     | 314640 |
| UXS1       | 0.37348494  | 0.004454902 | UGD                 | 246232 |
| VWC2       | 0.865909    | 0.004454902 |                     | 501231 |



|         |             |             |                          |           |
|---------|-------------|-------------|--------------------------|-----------|
| MEPCE   | -0.39203325 | 0.004465452 |                          | 304361    |
| CSTF2   | 0.29538757  | 0.004491416 |                          | 683927    |
| FUNDC1  | -0.5906039  | 0.004509994 |                          | 363442    |
| CUL3    | 0.36666733  | 0.004511394 |                          | 301555    |
| ALKBH1  | 0.41555202  | 0.004555387 | Alkbh                    | 362766    |
| CEP85L  | 0.7712387   | 0.004556595 |                          | 100365935 |
| THBS2   | 1.1592374   | 0.004579172 | TSP-2                    | 292406    |
| CCDC71  | -0.5524986  | 0.0045851   |                          | 498678    |
| PRTN3   | -0.91662306 | 0.004593573 |                          | 314615    |
| TUBA4A  | 0.42560843  | 0.004598877 | Tuba4                    | 316531    |
| TSPAN17 | -0.51210874 | 0.004600765 | Fbxo23 GHB-R             | 306771    |
| TMEM202 | 1.0555767   | 0.004626515 |                          | 691306    |
| RHOA    | 0.49570227  | 0.004637632 | Arha Arha2               | 117273    |
| GNE     | 0.51726013  | 0.004663155 | Uae1                     | 114711    |
| ALKBH2  | -0.8614533  | 0.004668592 | RGD1306377               | 304578    |
| KDM4A   | -0.49764067 | 0.004688337 | Jmjd2a                   | 313539    |
| HNRNPH1 | 0.46152624  | 0.004688713 | Hnrph Hnrph1             | 140931    |
| PAX1    | 1.1155308   | 0.00469122  | Pax-1                    | 311505    |
| TUBG1   | -0.47636124 | 0.004773877 |                          | 252921    |
| NFYA    | 0.48423356  | 0.004798219 | CBF-A                    | 29508     |
| PRKAA1  | 0.3957278   | 0.004844106 | AMPKalpha1               | 65248     |
| POLD1   | 0.49632335  | 0.004845094 |                          | 59294     |
| CNNM2   | -0.65561235 | 0.004852129 |                          | 294014    |
| AKAP5   | -0.8019565  | 0.00488042  | AKAP150 Akap79 P150      | 171026    |
| RNF145  | -0.44215265 | 0.004890411 | RGD1309561               | 287212    |
| COMMD7  | -0.49026376 | 0.004907491 |                          | 296285    |
| GAR1    | 0.56295294  | 0.004907491 | Nola1                    | 499709    |
| NTRK3   | 0.7086573   | 0.004907491 | trkC                     | 29613     |
| SMYD5   | -0.3803803  | 0.004916756 |                          | 312503    |
| PCDHA5  | -0.5710929  | 0.004936068 | rCNRv05                  | 393087    |
| FIG4    | -0.4024622  | 0.004944686 | Kiaa0274 RGD1311375 Sac3 | 309855    |
| 42802   | -0.4099952  | 0.00495365  | Mir                      | 312656    |
| MZF1    | -0.408548   | 0.004959129 | Zfp98                    | 361508    |
| PPP1R1A | 0.6349888   | 0.004966796 |                          | 58977     |
| PEAK1   | 1.2385699   | 0.00496826  | RGD1312026               | 315686    |
| RNF167  | -0.35393977 | 0.00497668  | RGD1305972               | 360554    |
| PPP3CC  | -0.38419008 | 0.004986884 |                          | 171378    |
| TRPC4   | -0.5223144  | 0.005011922 | Trp4 Trrp4               | 84494     |
| NAP1L3  | -0.72873604 | 0.005018402 |                          | 170914    |
| CHST10  | 0.52101976  | 0.005029481 | Hnk-1st                  | 140568    |
| RPAP2   | -0.4148779  | 0.005081292 | RGD1309034               | 305120    |
| F2R     | 0.36301935  | 0.005097748 | Par1 TRGPC               | 25439     |
| TTC14   | 0.639218    | 0.005097748 |                          | 310314    |

|           |             |             |                       |           |
|-----------|-------------|-------------|-----------------------|-----------|
| GAS7      | -0.5019012  | 0.00510623  |                       | 85246     |
| SDK2      | 1.196949    | 0.005116664 |                       | 360652    |
| SPDYA     | -0.76542056 | 0.005124109 | Gs4 Lm23 Spdy1 Spy1   | 192209    |
| BOK       | -0.701874   | 0.005136154 | Bok-BH3               | 29884     |
| EMC9      | -0.8998065  | 0.005136166 | Fam158a RGD1308113    | 290224    |
| TMPO      | 0.32697394  | 0.005138164 | LAP2                  | 25359     |
| KCNK1     | 0.36667544  | 0.005139695 | Twik                  | 59324     |
| TERF1     | 0.5834361   | 0.005147464 |                       | 297758    |
| TGIF1     | 0.6937128   | 0.005147464 | Tfig Tgif             | 316742    |
| HPGD      | 1.1811209   | 0.005147464 |                       | 79242     |
| FJX1      | 0.5376544   | 0.005156112 |                       | 366140    |
| CDC25B    | -0.48590094 | 0.005168988 |                       | 171103    |
| SVOP      | -0.60297906 | 0.005182482 |                       | 171442    |
| HEMK1     | -0.5954756  | 0.005182482 | RGD1308293            | 300989    |
| ZDHHC5    | 0.6428169   | 0.005216695 | DHHC-5                | 362156    |
| RCOR1     | 0.44634447  | 0.005250085 | RGD1305743            | 102554884 |
| IL1RL2    | 1.1775132   | 0.005268157 |                       | 171106    |
| NASP      | 0.58709365  | 0.005275937 |                       | 298441    |
| FBXL6     | -0.5333863  | 0.005339098 |                       | 362941    |
| MED8      | 0.45743755  | 0.005354017 |                       | 362575    |
| SOBP      | -0.631317   | 0.005394171 | RGD1560479 Sobpl jcx1 | 309860    |
| LOC361635 | -0.35061666 | 0.005394371 |                       | 361635    |
| CDCA4     | 0.38979167  | 0.005422936 |                       | 500727    |
| FZR1      | -0.509077   | 0.005477336 |                       | 314642    |
| MELTF     | -1.0656476  | 0.005504429 | Magea1 Mfi2           | 288038    |
| FAM220A   | -0.41932482 | 0.005504429 | Sipar                 | 498145    |
| CCDC93    | 0.5447762   | 0.005507648 |                       | 304743    |
| TFDP1     | 0.34993988  | 0.005546859 |                       | 361178    |
| GLRX      | -0.48387155 | 0.005596032 | Glrx1 Grx             | 64045     |
| KIF3B     | -0.31642193 | 0.005596032 |                       | 296284    |
| ASCC3     | 0.49893677  | 0.005650464 | Helic1                | 309887    |
| PPFIA4    | -0.76504517 | 0.005665115 |                       | 140592    |
| ISG20L2   | 0.7826963   | 0.005676423 |                       | 361977    |
| TNRC6B    | -0.6648719  | 0.005709778 | Cbl27                 | 192178    |
| TNFRSF25  | 1.0643183   | 0.005733798 |                       | 500592    |
| TMEM141   | -0.6813307  | 0.005735843 | RGD1561492            | 499755    |
| WNT4      | 0.8826062   | 0.005740115 |                       | 84426     |
| CLN5      | 0.60114914  | 0.005746855 |                       | 306128    |
| WDR3      | 0.3375209   | 0.005779792 |                       | 310720    |
| ABTB1     | -0.6536297  | 0.005859064 |                       | 297432    |
| ERI2      | 0.51821464  | 0.005869466 | Exod1                 | 691484    |
| PIGM      | 0.56453097  | 0.005895754 | GPI-MT-I              | 79112     |
| CORO1C    | 0.5309538   | 0.005907807 | RGD1564490            | 501841    |

|            |             |             |                         |        |
|------------|-------------|-------------|-------------------------|--------|
| PKDCC      | 0.49999848  | 0.005909331 | RGD1311939 Sgk493       | 313860 |
| RGD1307315 | -0.4464015  | 0.00591617  |                         | 362793 |
| MSANTD3    | 0.42342773  | 0.005918904 | RGD1308165              | 362516 |
| EPHA2      | 1.0286369   | 0.005919148 |                         | 366492 |
| FBXO31     | -0.6204082  | 0.005923453 | RGD1561069              | 498959 |
| MAGED2     | -0.35522595 | 0.005938329 |                         | 113947 |
| AKAP12     | 0.4540927   | 0.005938329 | AKAP12A AKAP12B AKAP12C | 83425  |
| ACVR1B     | -0.52200156 | 0.005945652 | Skr2                    | 29381  |
| CNTN3      | -0.86453986 | 0.005964303 | BIG-1 Pang              | 54279  |
| YPEL2      | -0.9454961  | 0.00598012  | RGD1311564              | 360590 |
| MSL3L2     | 0.7059998   | 0.005988806 | RGD1308699              | 309790 |
| PRR13      | -0.40907007 | 0.006000093 | RGD1307129              | 363004 |
| FAM129B    | 0.54152995  | 0.006012125 | RGD1307018              | 362115 |
| NR2F6      | 0.46301594  | 0.006019252 |                         | 245980 |
| SLC35F5    | -0.36386016 | 0.006063604 |                         | 288993 |
| NOV        | -0.5798898  | 0.006083168 |                         | 81526  |
| ASIC1      | -0.42842707 | 0.006100501 | Accn2                   | 79123  |
| SVBP       | -0.8070299  | 0.006107451 | Ccdc23 RGD1311232       | 362578 |
| NABP1      | 0.7346499   | 0.006111566 | Obfc2a RGD1306658       | 363227 |
| TMEM205    | -0.6299742  | 0.006129767 | RGD1563250              | 300441 |
| NAT10      | 0.37204736  | 0.006133545 | RGD1306717              | 311257 |
| CANT1      | -0.5045032  | 0.006144266 | srapy                   | 246272 |
| RNF180     | -0.37024853 | 0.006163667 |                         | 685384 |
| CISD3      | -0.6918637  | 0.006166389 | Mel13 RGD1559720        | 287661 |
| IPO7       | 0.39745855  | 0.006166389 |                         | 308939 |
| DFNB31     | 0.5800239   | 0.006166389 | Cip98 Whrn              | 313255 |
| PACSIN2    | 0.63012505  | 0.006166389 | SdplI                   | 124461 |
| EPRS       | 0.5938935   | 0.006239232 |                         | 289352 |
| AP4B1      | -0.3710514  | 0.006244707 |                         | 310746 |
| TRANK1     | 0.74175256  | 0.006244707 | RGD1563130              | 316022 |
| AGFG2      | -0.5693147  | 0.006261388 | Hrbl                    | 304375 |
| SAMHD1     | 0.49654856  | 0.006312627 |                         | 311580 |
| SAMD5      | 0.8477639   | 0.006338316 | RGD1311012              | 365038 |
| LIG4       | 0.66022676  | 0.006354985 |                         | 290907 |
| LRRFIP1    | 0.3652048   | 0.006383461 |                         | 367314 |
| RAB2B      | -0.3584162  | 0.006421351 |                         | 305853 |
| TAF2       | 0.30742243  | 0.006444161 | TAFIIB                  | 170844 |
| SYT12      | 0.75857925  | 0.006454528 | Srg1                    | 191595 |
| ATG4C      | -0.42357612 | 0.006478442 |                         | 313391 |
| VGLL4      | 0.35816586  | 0.006478442 |                         | 297523 |
| AQP11      | -0.61925507 | 0.006514886 |                         | 286758 |
| NARS       | 0.44664752  | 0.006528283 | LRRGT00113              | 291556 |
| IGFBPL1    | -0.6693971  | 0.006588765 |                         | 366366 |

|            |             |             |            |        |
|------------|-------------|-------------|------------|--------|
| INO80C     | -0.36147293 | 0.006594931 | RGD1310199 | 291737 |
| TACR1      | -1.0150286  | 0.006642334 | Tac1r      | 24807  |
| LENG8      | 0.5379686   | 0.006642334 |            | 361506 |
| FRAS1      | 1.1956491   | 0.006642334 |            | 289486 |
| NRAP       | -0.94512296 | 0.006742248 |            | 307982 |
| RAI2       | -0.4963332  | 0.006761554 | RGD1560139 | 501555 |
| ATP5S      | -0.8233238  | 0.006810316 |            | 362749 |
| CNR1       | -0.59843177 | 0.006857776 | SKR6R      | 25248  |
| FGF8       | 1.2183199   | 0.00687262  |            | 29349  |
| PEX14      | -0.43377188 | 0.006914046 |            | 64460  |
| CDC42EP2   | -0.8827879  | 0.006927021 |            | 309175 |
| KCTD15     | -0.39976555 | 0.006962657 |            | 499129 |
| BAMBI      | -0.64160264 | 0.006993972 |            | 83837  |
| TIMP4      | 0.61468256  | 0.006993972 |            | 680130 |
| TARBP2     | -0.3733423  | 0.007031335 |            | 363006 |
| HMG20A     | -0.3441888  | 0.007074592 | RGD1564760 | 315689 |
| TMEM114    | 1.1656243   | 0.007099612 | RGD1560593 | 501675 |
| KCNE2      | -0.7082734  | 0.007102726 | Mirp1      | 171138 |
| BEND5      | -0.6119894  | 0.007102726 |            | 362564 |
| MMS19      | -0.3799196  | 0.007102726 | Mms19l     | 171124 |
| PARD6B     | 0.4408882   | 0.007102726 |            | 362279 |
| RGD1310769 | -0.47779393 | 0.007161525 |            | 299207 |
| RBAK       | 0.40330344  | 0.007161525 | RGD1562875 | 288489 |
| WDR4       | 0.66925246  | 0.007161525 |            | 690032 |
| NECAB3     | -0.8259294  | 0.007169013 | Apba2bp    | 311562 |
| MRPL34     | -0.7356181  | 0.007183372 |            | 290632 |
| DTX3       | -0.41688272 | 0.00719039  | RGD1566181 | 500847 |
| FRY        | -0.8267952  | 0.007203703 | RGD1307034 | 304244 |
| LDB1       | -0.3872721  | 0.007323738 |            | 309447 |
| NR0B1      | 1.0694661   | 0.007323738 | Ahch DAX-1 | 58850  |
| DEAF1      | -0.55294883 | 0.007333743 | NUDR       | 83632  |
| TARDBP     | 0.3015849   | 0.007337708 | Tdp-43     | 298648 |
| ATG10      | -0.7369567  | 0.007339263 |            | 688555 |
| ARL4A      | 0.5981951   | 0.007339263 | Arl4       | 29308  |
| TDRD6      | -1.1833401  | 0.007401314 |            | 316254 |
| TMEM106B   | -0.30082932 | 0.007401314 | LRRGT00101 | 312132 |
| PCDH7      | 0.76379704  | 0.007401314 |            | 360942 |
| CDK5RAP1   | -0.53716445 | 0.007436976 |            | 252827 |
| SNRPA      | 0.3253762   | 0.007436976 |            | 292729 |
| SLC43A1    | 0.850067    | 0.007438363 |            | 311168 |
| TMEM178A   | 0.5657237   | 0.007500956 | Tmem178    | 362691 |
| TES        | 0.5907334   | 0.007521784 |            | 500040 |
| TRAPPC4    | -0.64285696 | 0.007616847 | Sbdn       | 367073 |

|            |             |             |                           |        |
|------------|-------------|-------------|---------------------------|--------|
| TOP1MT     | -0.59850335 | 0.007637879 |                           | 300029 |
| CBLN1      | -0.61230785 | 0.007648109 |                           | 498922 |
| HIBCH      | -0.42652848 | 0.007669291 |                           | 301384 |
| CRY2       | 0.55243105  | 0.00776325  |                           | 170917 |
| CBLN4      | -0.76772314 | 0.007824593 |                           | 499947 |
| FRA10AC1   | -0.6739591  | 0.007824593 | RGD1309482                | 365458 |
| LRRC7      | 0.74293244  | 0.007852638 |                           | 117284 |
| NHLH2      | -0.99175644 | 0.007871    |                           | 295327 |
| PHYHD1     | 0.6154232   | 0.007871    |                           | 296621 |
| ATXN2L     | 0.67690605  | 0.007871434 | RGD1565868                | 361649 |
| WDR5       | 0.3201417   | 0.007872803 |                           | 362093 |
| VAR2       | -0.37360045 | 0.007873848 | Vars2l Varsl              | 309596 |
| HRH1       | 0.7724292   | 0.007873848 | Hisr                      | 24448  |
| PLXNA2     | 0.79055667  | 0.007896097 |                           | 289392 |
| RNGTT      | -0.30786905 | 0.007917888 |                           | 313131 |
| ATG13      | -0.5128015  | 0.007935271 | Harbi1 Harbi1l RGD1310685 | 362164 |
| DEF6       | -1.148882   | 0.007943125 |                           | 309642 |
| SLC9A5     | 0.49069187  | 0.007967993 | Nhe5                      | 192215 |
| TMEM55B    | -0.39198777 | 0.008072576 | RGD1307475                | 364298 |
| SARS       | 0.39547387  | 0.008072576 | Sars1                     | 266975 |
| OLIG2      | 0.36800122  | 0.008075546 |                           | 304103 |
| BCOR       | 0.44199145  | 0.008079262 | RGD1562735                | 317346 |
| MFSD3      | -0.58512545 | 0.008091276 |                           | 500899 |
| IWS1       | 0.46569702  | 0.008118515 | RGD1304762                | 291705 |
| ST8SIA4    | -0.7798197  | 0.008123681 | Siat8d                    | 116696 |
| RBM46      | -0.7862903  | 0.008132804 | RGD1560205                | 310548 |
| RGD1311188 | 0.5532214   | 0.008146983 |                           | 315088 |
| CYR61      | 0.95583934  | 0.008146983 |                           | 83476  |
| SGMS1      | 0.44758293  | 0.008148881 | Mob Tmem23                | 353229 |
| SLCO1C1    | 0.6127385   | 0.008177418 | Bsat1 Oatp14 Slc21a14     | 84511  |
| DPF1       | -0.58634126 | 0.008184612 | Neud4                     | 50545  |
| RIOK3      | 0.3015605   | 0.008250138 |                           | 361293 |
| PTPRH      | -0.9853315  | 0.008254619 | Bem2                      | 171125 |
| DUOX1      | 1.0812548   | 0.008254619 |                           | 266807 |
| RGS9       | -0.7473781  | 0.008289885 |                           | 29481  |
| COQ10A     | -0.4284515  | 0.008343717 | RGD1562447                | 362810 |
| ANKEF1     | 1.2020665   | 0.008350425 | Ankrd5                    | 296184 |
| PJA2       | -0.35182375 | 0.008373673 | Neurodap1 praja2          | 192256 |
| ST3GAL2    | -0.54038936 | 0.008385118 | Siat4b Siat5              | 64442  |
| C1QL1      | 0.43491355  | 0.008396974 |                           | 363686 |
| SMOX       | 0.34669903  | 0.008435047 |                           | 308652 |
| PIH1D1     | -0.47758472 | 0.008503411 | RGD1309809                | 292898 |
| WLS        | 0.37792286  | 0.008532126 | Gpr177                    | 362065 |

|          |             |             |                         |        |
|----------|-------------|-------------|-------------------------|--------|
| TMF1     | 0.63926774  | 0.008532126 |                         | 114206 |
| TTC33    | -0.42918146 | 0.008553218 | RGD1564042              | 294774 |
| KEAP1    | -0.48125336 | 0.008556129 | Inrf2                   | 117519 |
| RASGRF1  | -0.44856116 | 0.008556129 |                         | 192213 |
| KPNB1    | 0.56883645  | 0.008556129 | Impnb                   | 24917  |
| CUL4A    | -0.3229395  | 0.008583327 | RGD1563853              | 361181 |
| GALNT3   | -0.77247727 | 0.008656305 |                         | 366061 |
| PRPSAP2  | -0.40071207 | 0.008660885 | Pap41                   | 117272 |
| CCDC40   | -0.65257496 | 0.008794177 |                         | 287867 |
| CFAP97   | -0.57325876 | 0.008794177 | RGD1307325              | 306469 |
| NFKB1    | 0.59376323  | 0.008794177 | EBP-1 NF-kB             | 81736  |
| ZFP189   | 0.6014152   | 0.008794177 |                         | 313219 |
| EFNA5    | 0.8253024   | 0.008794177 | Lerk7                   | 116683 |
| IL11     | -0.8465593  | 0.008835731 | Il-11                   | 171040 |
| BANP     | -0.35008252 | 0.008862481 |                         | 292064 |
| FSCN1    | 0.5502662   | 0.008885613 | Fascin                  | 683788 |
| ELAC2    | 0.37857094  | 0.00893575  |                         | 282826 |
| LMBR1L   | -0.5199525  | 0.009033621 | RGD1309631              | 300215 |
| HERPUD2  | -0.53365934 | 0.009096939 | RGD1307343              | 300463 |
| MAPK1IP1 | -0.50829536 | 0.009096939 | RGD1565431              | 499280 |
| GNL3     | 0.5454993   | 0.009097274 | Ns                      | 290556 |
| KCNK13   | 1.0015669   | 0.009097274 | THIK-1 prdx1            | 64120  |
| KLF13    | -0.5957496  | 0.009102651 | RGD1565099              | 499171 |
| LZTFL1   | -0.57112455 | 0.009116273 |                         | 316102 |
| XKR7     | 1.15487     | 0.009132666 |                         | 311549 |
| BTG4     | -1.0542605  | 0.009133044 | SCIR-27                 | 315650 |
| FLOT1    | -0.57301366 | 0.009232132 | Rareg                   | 64665  |
| WDR77    | 0.35151115  | 0.009239938 | Ac2-269 MEP-50 RGD13104 | 310769 |
| NPY      | 0.94925565  | 0.009372319 | NPY02 RATNPY RATNPY02   | 24604  |
| PPP1R1B  | 0.43043384  | 0.009427398 | Darpp-32 Darpp32        | 360616 |
| ELF3     | -1.1831183  | 0.009427593 |                         | 304815 |
| KATNB1   | -0.4570654  | 0.009427593 |                         | 291852 |
| SGCA     | 0.9726473   | 0.009429377 |                         | 303468 |
| ZC3H11A  | 0.73905     | 0.009568936 | RGD1308290              | 360845 |
| KCNK5    | 0.898048    | 0.009568936 | TASK2                   | 364241 |
| CDK8     | 0.34470317  | 0.009589051 | RGD1560888              | 498140 |
| ASCC1    | -0.4827921  | 0.009596734 | Asc-1 CGI-18            | 294512 |
| CFB      | 0.99190015  | 0.009596734 | Bf Da1-24               | 294257 |
| CDK2AP2  | -0.44704607 | 0.009633761 |                         | 688405 |
| USP13    | 0.3351111   | 0.009750959 |                         | 310306 |
| BZW1     | 0.4769006   | 0.009750959 |                         | 363232 |
| RASA1    | 0.46877527  | 0.009786127 | GAPX Rasa               | 25676  |
| MAK16    | 0.60697174  | 0.0098085   | RGD1311297 Rbm13        | 306526 |

|          |             |             |                          |        |
|----------|-------------|-------------|--------------------------|--------|
| INTS12   | 0.40871048  | 0.009844609 | Phf22                    | 295448 |
| RAB27B   | 0.7839486   | 0.009873074 |                          | 84590  |
| MSRB1    | -0.37079212 | 0.00987861  | Sepx1 selX               | 685059 |
| MAP3K12  | -0.36958146 | 0.009950466 | DLK MUK PK Zpk           | 25579  |
| PDE3B    | 0.55044544  | 0.009950466 |                          | 29516  |
| VAV3     | 0.66234994  | 0.009977018 | RGD1565941               | 295378 |
| TMPRSS6  | 1.0566071   | 0.009998485 |                          | 315388 |
| HSCB     | -0.53802866 | 0.010015708 | RGD1311005               | 360826 |
| TTC39C   | 0.5109129   | 0.010026858 |                          | 686179 |
| NOTCH4   | -0.5388284  | 0.010029635 |                          | 406162 |
| RPS6KA3  | 0.7044436   | 0.010052121 | RGD1563860               | 501560 |
| GNA11    | 0.5249587   | 0.010080943 |                          | 81662  |
| PVRL1    | 0.6996072   | 0.010245699 | HveC Pvrl1 nectin-1      | 192183 |
| PBX1     | -0.7391616  | 0.010258959 |                          | 304947 |
| TBP      | 0.43738207  | 0.010327858 | TFIID                    | 117526 |
| TMEM229B | -0.5321619  | 0.010432375 | RGD1562622               | 503035 |
| HINT3    | -0.47867116 | 0.010432375 | HINT-3 HINT-4 Hint4      | 246769 |
| MET      | 0.7387908   | 0.01045371  | Hgfr                     | 24553  |
| HBP1     | -0.462579   | 0.010578232 | Hmgb1                    | 27080  |
| BMS1     | 0.4483293   | 0.01058447  | Bms1l                    | 362426 |
| POLDIP2  | -0.2770717  | 0.01068762  |                          | 287544 |
| CDK12    | 0.72352934  | 0.01068762  | Crk7 Crkrs Pksc          | 192350 |
| GLDN     | 0.7637601   | 0.010722259 | Colm Crgl2               | 315675 |
| SDHC     | -0.27536422 | 0.010724688 |                          | 289217 |
| AFAP1L1  | 0.7564462   | 0.010724688 | RGD1311580               | 291565 |
| BFAR     | -0.32794145 | 0.010738542 |                          | 304709 |
| KMT5A    | 0.734331    | 0.010748866 | Pr-set7 RGD1305893 Setd8 | 689820 |
| ERBB3    | 0.7934279   | 0.010816959 | nuc-ErbB3                | 29496  |
| RAB43    | 0.8154377   | 0.010816959 |                          | 500249 |
| MYBL1    | 0.7658934   | 0.010897748 |                          | 297783 |
| JAKMIP3  | -0.56649476 | 0.010920779 | Necc2 RGD1307177         | 365380 |
| PHRF1    | 0.45779696  | 0.010951469 |                          | 245925 |
| MRVI1    | 1.1131667   | 0.010966362 |                          | 308899 |
| COMTD1   | -0.38202608 | 0.010984688 |                          | 305685 |
| RIOK2    | 0.51462376  | 0.010996142 |                          | 308201 |
| PCGF5    | 0.7161094   | 0.011064585 |                          | 681178 |
| PRRT2    | -0.5121309  | 0.011066943 | DSPB3 RGD1564195         | 361651 |
| HDAC9    | -0.72362775 | 0.011070985 | RGD1310748 RGD1563092    | 687001 |
| XRCC5    | -0.4033135  | 0.011080731 | Ku80 Kup80               | 363247 |
| HPCAL1   | -0.5157591  | 0.011088899 | NVP-3 Nvp3 VILIP-3       | 50871  |
| BMF      | -0.83336586 | 0.011220546 |                          | 246142 |
| DDX39A   | 0.40229562  | 0.011228486 | Ddx39 Ddxl               | 89827  |
| LMO4     | -0.76822114 | 0.011260265 |                          | 362051 |

|            |             |             |                           |           |
|------------|-------------|-------------|---------------------------|-----------|
| DDX56      | 0.33297938  | 0.011277332 | Ddx21 RH-II/Gu            | 289780    |
| PTBP1      | 0.5902062   | 0.01129836  | PTB1 Ptb Pybp Pybp1 Pybp1 | 29497     |
| METTL18    | 0.68845814  | 0.011364142 | RGD1306783                | 304928    |
| GOLPH3L    | -0.35808986 | 0.011370461 |                           | 310669    |
| SRPRA      | 0.31458172  | 0.011376195 | Srpr                      | 315548    |
| TRPC3      | -0.5177324  | 0.011378234 | TrpC3c Trrp3              | 60395     |
| ANKRD34C   | 1.1576787   | 0.011426149 | RGD1305403                | 300889    |
| CCDC148    | -0.6401252  | 0.011467871 | RGD1561169                | 311051    |
| G3BP1      | 0.29962832  | 0.011478704 | G3bp RGD1310666           | 171092    |
| HSPB11     | -0.645847   | 0.011492399 |                           | 685284    |
| SLC19A2    | 0.44552222  | 0.011543294 |                           | 289175    |
| TRMT12     | 0.47362167  | 0.011628785 | RGD1307127                | 314999    |
| GRIP1      | 0.5774581   | 0.011628785 |                           | 84016     |
| FNDC1      | 0.82207674  | 0.011628785 |                           | 308099    |
| SLC39A6    | 0.297998    | 0.011633094 |                           | 291733    |
| DCAF10     | 0.5334191   | 0.011633094 | RGD1304730 Wdr32          | 313242    |
| DDI2       | 0.62694544  | 0.011633094 | RGD1311815                | 313668    |
| BANK1      | -1.1293828  | 0.01166602  | LRRGT00104                | 365948    |
| PNKD       | -0.36677125 | 0.011666717 | Mr-1                      | 100188944 |
| SNX16      | 0.35181302  | 0.011668363 |                           | 64088     |
| LOC363337  | 0.9969346   | 0.011669235 |                           | 363337    |
| ANAPC7     | -0.29959714 | 0.011677975 |                           | 304490    |
| CDV3       | 0.5922145   | 0.011718756 |                           | 315970    |
| ARHGAP25   | 0.9579346   | 0.011726267 | RGD1562105                | 500246    |
| PLOD3      | 0.3947694   | 0.011803632 |                           | 288583    |
| TEKT2      | -0.93230605 | 0.011809778 |                           | 298532    |
| SRRM3      | -0.4555189  | 0.011809778 | RGD1307391                | 685890    |
| MOSPD3     | -0.51183414 | 0.011891845 |                           | 288557    |
| RAD51      | 0.44940814  | 0.01191205  | RGD1563603                | 499870    |
| PARD6A     | -0.63022274 | 0.011914798 | Par-6a Par6a              | 307799    |
| SMIM20     | -0.5709944  | 0.011914798 | RGD1565192                | 501923    |
| GTF2IRD1   | -0.46814457 | 0.011914798 | Gtf3                      | 246770    |
| ARHGEF7    | 0.43864736  | 0.011914798 | P85spr Pak3bp             | 114559    |
| LFNG       | 0.44454327  | 0.011976814 |                           | 170905    |
| RGD1309028 | -0.6242827  | 0.012039031 |                           | 299265    |
| CASP9      | -0.4441282  | 0.012155866 | Apaf3 Casp-9-CTD Casp9_v1 | 58918     |
| ADAP1      | -0.4007203  | 0.012155866 | Centa1 p42IP4             | 171097    |
| PI16       | -0.7531638  | 0.012169292 |                           | 294312    |
| TCEAL1     | -0.6499034  | 0.012176254 |                           | 302593    |
| OGFOD1     | 0.5635196   | 0.012176254 | RGD1308848                | 307657    |
| SEMA6B     | -0.58345705 | 0.012255387 |                           | 84609     |
| ZFP9       | -0.5530713  | 0.012271681 |                           | 100158232 |
| PAFAH1B3   | -0.60000294 | 0.012316116 |                           | 114113    |



|            |             |             |                             |        |
|------------|-------------|-------------|-----------------------------|--------|
| PTP4A2     | 0.5444053   | 0.012316116 |                             | 85237  |
| CLCN5      | 0.99063647  | 0.012317729 | CLC5                        | 25749  |
| CRAT       | -0.43266946 | 0.012332224 |                             | 311849 |
| NUDT16     | -0.59488744 | 0.012413353 | RGD1311387                  | 363129 |
| CELF6      | -0.35775325 | 0.012423826 | Brunol6                     | 300758 |
| CDK2       | 0.42351413  | 0.012472671 |                             | 362817 |
| FAM227A    | -0.5646193  | 0.012541516 | RGD1305939                  | 300074 |
| RAD18      | 0.48092374  | 0.012632669 |                             | 362412 |
| HSPA14     | 0.34657094  | 0.012634094 |                             | 307133 |
| PPP1R12A   | 0.4900083   | 0.012656978 | M110 MBSP Mypt1             | 116670 |
| ABTB2      | 0.52522504  | 0.012657382 | Cca3                        | 171440 |
| E2F3       | 0.6646341   | 0.012657382 | RGD1561600                  | 291105 |
| U2AF1      | 0.47243112  | 0.012676724 |                             | 687575 |
| SLC7A5     | 0.64414984  | 0.01268377  | E16 TA1                     | 50719  |
| ALKBH4     | 0.4706152   | 0.012723504 | RGD1308608                  | 288587 |
| B3GALT5    | -0.60520667 | 0.012782929 |                             | 288161 |
| FEM1A      | 0.43934175  | 0.012786375 |                             | 316131 |
| IRGQ       | -0.4388204  | 0.012798666 | RGD1309409                  | 292708 |
| HPS4       | -0.36125737 | 0.012807782 |                             | 304555 |
| PIK3CB     | 0.6236102   | 0.012816889 |                             | 85243  |
| ASCC2      | 0.56986994  | 0.012851208 | RGD1561422                  | 498402 |
| WDR45      | -0.4638789  | 0.012886619 |                             | 302559 |
| PRKCQ      | -0.4221288  | 0.01289057  | Pkcq                        | 85420  |
| ZFP575     | -0.6800261  | 0.012934943 | Znf575                      | 308430 |
| OSBPL9     | -0.42365465 | 0.012934943 |                             | 298369 |
| FADS3      | -0.3418549  | 0.012934943 |                             | 286922 |
| CDKN2AIPNL | -0.51119804 | 0.012948143 | RGD1308696                  | 287278 |
| EME1       | 0.70008147  | 0.01298084  |                             | 287634 |
| GRK5       | 0.5016199   | 0.012997693 | Gprk5                       | 59075  |
| LCMT2      | 0.6007042   | 0.013089576 |                             | 296098 |
| FAM134A    | -0.4706435  | 0.013092566 | RGD1306844                  | 363252 |
| ARF1       | 0.2535262   | 0.013098046 |                             | 64310  |
| SEC13      | 0.2940295   | 0.013098046 | Sec13l1                     | 297522 |
| KIFC3      | 0.33618397  | 0.013098096 | KRP4                        | 307644 |
| UROD       | -0.39947385 | 0.013158204 | porphyrinogen carboxy-lyase | 29421  |
| RCAN1      | 0.3098915   | 0.013201669 | Dscr1 Mcip1                 | 266766 |
| PSENE1     | -0.3733969  | 0.013263653 | RGD1312037                  | 292788 |
| KIF18B     | 0.54401064  | 0.013345053 | RGD1310360                  | 303575 |
| MEOX2      | 1.1383067   | 0.013349704 |                             | 29279  |
| CMTR2      | 0.40433457  | 0.013375053 | Ftsjd1 RGD1309394           | 292016 |
| TMA16      | 0.66073817  | 0.013386441 | RGD1305222                  | 290686 |
| KCNJ5      | 1.139306    | 0.01343561  |                             | 29713  |
| PDXP       | -0.627077   | 0.013486668 | Rbp1                        | 727679 |

|            |             |             |                           |        |
|------------|-------------|-------------|---------------------------|--------|
| GABARAPL1  | -0.3361119  | 0.013505544 | Gec1                      | 689161 |
| FNTB       | -0.32460427 | 0.013505544 |                           | 64511  |
| CRIPT      | -0.5646176  | 0.013523571 |                           | 56725  |
| FUT7       | 0.94434845  | 0.013527854 |                           | 296564 |
| SAPCD2     | 0.5823559   | 0.013559467 |                           | 680531 |
| PLK4       | 0.45452306  | 0.013645521 |                           | 310344 |
| WHSC1      | 0.56271935  | 0.013645521 | RGD1565590                | 680537 |
| RAPGEF3    | 0.41137132  | 0.013665983 | Epac                      | 59326  |
| ITGA11     | -1.0088171  | 0.013686501 |                           | 315744 |
| NUDT22     | -0.7193156  | 0.013696576 |                           | 293703 |
| E2F6       | 0.47217578  | 0.013747766 |                           | 313978 |
| CCDC175    | -0.68771666 | 0.013760201 |                           | 500668 |
| TRPT1      | -0.62095404 | 0.013778904 | Tpt1h                     | 293704 |
| MAD2L1BP   | 0.46765026  | 0.013778904 |                           | 316237 |
| CYTH1      | -0.42518106 | 0.013819262 | Pscd1 Sec7                | 116691 |
| MAPK3      | -0.44389716 | 0.013960122 | ERK1 ERT2 Erk-1 Esrk1 MAF | 50689  |
| SRP68      | 0.2553731   | 0.013960122 |                           | 363707 |
| PNKP       | 0.41672245  | 0.013967045 |                           | 308576 |
| APBA2      | 0.44258118  | 0.013969976 | Mint2                     | 83610  |
| NCOA4      | 0.2536262   | 0.01399342  |                           | 619385 |
| DVL1       | 0.41346362  | 0.014030753 | dvl-1                     | 83721  |
| CEP104     | 0.44551     | 0.014032714 | GlyBP                     | 246295 |
| ZFP35      | 0.46781194  | 0.014046456 | Zfp239                    | 307547 |
| TAS1R3     | 1.1216946   | 0.014046456 | T1r3                      | 170634 |
| CNNM1      | 0.64462084  | 0.0140548   |                           | 309387 |
| CROT       | 0.31769052  | 0.014072188 |                           | 83842  |
| CLDN9      | -1.0229357  | 0.014098884 |                           | 287099 |
| VKORC1     | -0.584093   | 0.014123564 |                           | 309004 |
| ZFAND2B    | -0.54397416 | 0.014211214 | RGD1306260                | 363253 |
| MGAT1      | -0.33278877 | 0.014421033 |                           | 81519  |
| POPDC3     | 0.64929414  | 0.014451542 |                           | 641520 |
| TPD52L3    | -1.1269943  | 0.014482369 | RGD1309391 Trpd52l3       | 293894 |
| SLC9A3R1   | 0.2791779   | 0.01448429  |                           | 59114  |
| ZFP358     | -0.40169713 | 0.01453809  |                           | 360754 |
| ELOVL5     | 0.6144908   | 0.014565824 | rELO1                     | 171400 |
| SLC22A23   | 0.546605    | 0.014620495 | Nritp                     | 64559  |
| WBSCR17    | 0.59746975  | 0.014620495 |                           | 288611 |
| GRIN2A     | 1.1237993   | 0.014670977 | GluN2A NMDAR2A NR2A       | 24409  |
| EGLN3      | -0.36376014 | 0.014675131 | PHD-3 PHD3 SM-20          | 54702  |
| RGD1307443 | -0.6906255  | 0.014710051 |                           | 361244 |
| SLC35A5    | -0.42048854 | 0.014710051 | RGD1564361                | 498081 |
| RSPO3      | -0.7410595  | 0.014804967 | RGD1563246                | 498997 |
| USP1       | 0.47711465  | 0.01482081  |                           | 313387 |

|            |             |             |                         |        |
|------------|-------------|-------------|-------------------------|--------|
| CELF1      | 0.6000399   | 0.014868277 | Cugbp1                  | 362160 |
| HSPA12A    | -0.4305887  | 0.014875834 |                         | 307997 |
| RTFDC1     | -0.34047946 | 0.014875834 | RGD1311072              | 296410 |
| GZF1       | 0.31087232  | 0.014882887 | RGD1562321 Zfp336       | 311508 |
| ITGA7      | 0.5440397   | 0.014901846 |                         | 81008  |
| ZFP414     | -0.53686273 | 0.01492048  | RGD1308123 Znf414       | 299647 |
| EIF1B      | -0.46571234 | 0.014938674 | RGD1309241              | 301068 |
| POLR1A     | 0.60301477  | 0.014951176 | Rpa1 Rpo1-4             | 83581  |
| ENTPD6     | -0.42570895 | 0.014967268 |                         | 85260  |
| RGD1565498 | 0.47882587  | 0.015042431 |                         | 500843 |
| KBTBD2     | 0.3364676   | 0.015217288 |                         | 312372 |
| LRRC42     | -0.41950768 | 0.015220032 | RGD1308919              | 298309 |
| MGAT5B     | -0.5500894  | 0.015225536 |                         | 303693 |
| LRRC55     | -0.77066547 | 0.015227393 |                         | 311171 |
| PAPD7      | 0.287108    | 0.015227393 | PolS                    | 306672 |
| COL26A1    | -0.7256622  | 0.015306952 |                         | 685612 |
| MCCC1      | -0.42266458 | 0.015306952 |                         | 294972 |
| ST6GAL1    | 0.30966005  | 0.015314262 | Siat1                   | 25197  |
| FSTL4      | 0.6717412   | 0.015316743 |                         | 303130 |
| TMEM45A    | 1.1240699   | 0.015316743 |                         | 680866 |
| HIBADH     | -0.38129097 | 0.01535139  |                         | 63938  |
| RGD1304694 | 0.4424138   | 0.01535139  |                         | 362974 |
| ZFP865     | -0.4434425  | 0.015435516 | RGD1565545 Znf865       | 308337 |
| C2CD5      | -0.28698078 | 0.015568304 | RGD1304592              | 362461 |
| KAT8       | -0.3544251  | 0.015594526 | Myst1                   | 310194 |
| INO80      | 0.46175486  | 0.015594526 | Inoc1 RGD1310969        | 296084 |
| CTTN       | 0.32078534  | 0.015613903 | Cttnb                   | 60465  |
| UBAP2      | 0.53915226  | 0.015616591 |                         | 313169 |
| PRKRIP1    | 0.42274854  | 0.015644388 |                         | 498171 |
| TMEM42     | -0.65324134 | 0.015668258 | RGD1307118              | 363171 |
| LOC688765  | 0.57121044  | 0.015714934 |                         | 688765 |
| FEZ1       | -0.38018176 | 0.015769731 |                         | 81730  |
| MRPL14     | -0.63503325 | 0.015814753 | L14mt L32mt MRP-L14 MRF | 301250 |
| PEO1       | -0.37689152 | 0.015904427 |                         | 309441 |
| FAM127B    | -0.40364155 | 0.015928643 | Cxx1a                   | 679038 |
| SLC27A2    | -0.83193815 | 0.015976228 |                         | 65192  |
| GRB10      | -0.3867585  | 0.016015625 | RGD1566234              | 498416 |
| SLC44A1    | 0.42136672  | 0.016015625 | Cdw92 Ctl1              | 85254  |
| GRP        | -0.75931096 | 0.016039979 |                         | 171101 |
| LRRC6      | -0.97423357 | 0.016069578 | Lrtp Tslrp              | 299920 |
| BRE        | -0.40150228 | 0.016130334 |                         | 362704 |
| SLC22A1    | -1.0284437  | 0.016288156 | Oct1 Orct1 Roct1        | 24904  |
| ISPD       | -0.5942794  | 0.016308328 | Nip                     | 493574 |

|              |             |             |                          |           |
|--------------|-------------|-------------|--------------------------|-----------|
| TSPYL1       | -0.30987325 | 0.016322302 | Tsyp1                    | 29544     |
| PITPNB       | 0.24328303  | 0.016322302 |                          | 114561    |
| EPHA5        | 0.42673656  | 0.016352832 | EHK-1 Els1 Els1.         | 79208     |
| NOP58        | 0.49382052  | 0.016380163 | Nap65 Nol5               | 60373     |
| SPON1        | 0.5561997   | 0.016466217 | Sponf                    | 64456     |
| ATPAF2       | -0.41099223 | 0.016475318 |                          | 303190    |
| POLE4        | -0.47191355 | 0.016498253 |                          | 362385    |
| ZC3H14       | 0.34251946  | 0.016498253 | Npuk68                   | 192359    |
| DIS3L2       | -0.39656162 | 0.01651732  | RGD1560168               | 367307    |
| TMEM39A      | 0.46733102  | 0.016577259 | RGD1306421               | 288092    |
| RNF125       | -0.96201056 | 0.016589224 |                          | 361296    |
| ATP6V0A2     | 0.57361895  | 0.016614597 | Cc1-3 J6b7 Tj6           | 116455    |
| HIGD2A       | -0.31916255 | 0.01662287  | RGD1309691               | 290999    |
| TMEM184B     | -0.44063416 | 0.016624494 | RGD1306591               | 362959    |
| AMN          | -0.93529457 | 0.016706992 |                          | 314459    |
| DOC2B        | 0.7099712   | 0.016706992 |                          | 81820     |
| SATB1        | -0.48735073 | 0.016751138 |                          | 316164    |
| CIAPIN1      | 0.42386988  | 0.01675911  |                          | 307649    |
| USP15        | 0.44951677  | 0.016768282 | Ubp109                   | 171329    |
| ZFP93        | -0.88612896 | 0.01677114  |                          | 296399    |
| TBX22        | -1.0988843  | 0.016847761 | Tbx 22                   | 302369    |
| PCDHA9       | -0.42499796 | 0.016847761 | rCNRv09                  | 393090    |
| SLC3A2       | 0.46668822  | 0.016847761 | Mdu1                     | 50567     |
| BTRC         | 0.47048524  | 0.016847761 | beta-TrCP1               | 361765    |
| HSPA9        | 0.6106112   | 0.016955905 | Crp40 GRP-75 Hspa9a PBP7 | 291671    |
| LINGO3       | 0.6689029   | 0.01696763  |                          | 690755    |
| GRN          | -0.40805992 | 0.017058002 | PGRN                     | 29143     |
| MFSD13A      | -0.43792814 | 0.017107178 | RGD1309313 Tmem180       | 309454    |
| TAL2         | 0.94439465  | 0.017111102 | Tail2                    | 685229    |
| ADARB1       | 0.49465048  | 0.017120646 | Adar2 Red1               | 25367     |
| USP47        | 0.29100683  | 0.017180504 |                          | 308896    |
| OSCP1        | -0.37596297 | 0.017206836 | RGD1306596               | 362595    |
| RGD1565059   | -0.7956027  | 0.017226197 |                          | 499630    |
| GLYCTK       | -0.54001683 | 0.017226197 |                          | 684314    |
| LOC100911367 | 0.5705844   | 0.017255178 |                          | 100911367 |
| ADAT1        | 0.4908129   | 0.017425861 |                          | 690810    |
| PTPRE        | 0.55275923  | 0.017460024 | PTPepsilon               | 114767    |
| CSTF1        | 0.33187506  | 0.017541908 |                          | 311670    |
| PEX13        | 0.3088094   | 0.01754587  |                          | 305581    |
| KIF19        | -0.71489835 | 0.017548606 | Kif19a RGD1559936        | 303659    |
| STRAP        | 0.30872402  | 0.017723577 |                          | 297699    |
| AHRR         | -1.0712992  | 0.01773828  |                          | 498999    |
| STK4         | 0.39856547  | 0.017745363 |                          | 311622    |

|           |             |             |                        |        |
|-----------|-------------|-------------|------------------------|--------|
| CACNB3    | -0.37787104 | 0.017808218 | CACH3B                 | 25297  |
| RHBDL1    | -0.7174056  | 0.017820828 | Rhbdl                  | 117025 |
| GPR160    | -1.0051844  | 0.017873589 |                        | 499588 |
| LIAS      | -0.52962303 | 0.017964575 |                        | 305348 |
| TMEM107   | -0.5602709  | 0.017983124 |                        | 691750 |
| RNF19B    | -0.3713631  | 0.018190706 | Ibrdc3                 | 313806 |
| MTERF4    | 0.3561925   | 0.018190706 | Mterfd2                | 363289 |
| STRN3     | 0.31938872  | 0.018196741 | Gs2na Sg2na            | 114520 |
| VOPP1     | -0.31295136 | 0.01823828  | Ecop RGD1306494        | 362374 |
| SEC22A    | -0.5121607  | 0.018246332 | Sec22l2                | 117513 |
| PTRH2     | 0.3744117   | 0.018246332 | RGD1306819             | 287593 |
| ZFP259    | 0.2686922   | 0.018263027 | RGD1562173             | 500989 |
| MYH7      | -0.7258306  | 0.018271018 | Bmyo Myhcb myHC-beta m | 29557  |
| TSC22D2   | 0.5230815   | 0.018339287 |                        | 499624 |
| WDR55     | 0.50927746  | 0.018367928 | LRRG00133 RGD1305640   | 307494 |
| ANKMY2    | -0.5344849  | 0.018450173 | Gna14                  | 314046 |
| SCARF1    | 1.0565767   | 0.018450173 |                        | 303313 |
| ZBTB20    | -0.70726675 | 0.018489016 | RGD1560387             | 288105 |
| NT5C1A    | -0.8567769  | 0.018526126 |                        | 313574 |
| KCNJ9     | -0.45441687 | 0.018526126 | Girk3 Kir3.3           | 116560 |
| RAB11FIP2 | -0.3372077  | 0.018526126 | RGD1308538             | 308003 |
| PBX4      | -0.6258097  | 0.01855699  | Edg4                   | 361131 |
| ABHD14A   | -0.7208101  | 0.0185698   | Dorz1 RGD1309721       | 300982 |
| FARS2     | -0.53872687 | 0.018574912 | Fars1                  | 306879 |
| GPR61     | -0.5982247  | 0.01859059  |                        | 310780 |
| BROX      | -0.3832211  | 0.018613735 | RGD1307161             | 305031 |
| ZCCHC8    | 0.4474043   | 0.01883635  |                        | 288661 |
| HRK       | -0.4555785  | 0.018928798 | Bid3 Dp5               | 117271 |
| USP11     | -0.30351844 | 0.018964652 | Uhx1                   | 408217 |
| PRSS36    | -0.6603448  | 0.019085756 |                        | 497040 |
| KLHDC1    | -0.65808123 | 0.019107081 |                        | 314190 |
| AAK1      | 0.53069514  | 0.019107081 | RGD1563580             | 500244 |
| PDGFC     | 0.74214494  | 0.019112902 | SCDGF                  | 79429  |
| SURF2     | 0.75827086  | 0.019112902 |                        | 619345 |
| STIM1     | -0.3825069  | 0.019153882 |                        | 361618 |
| ZCCHC24   | 0.30016264  | 0.019153882 | RGD1306164             | 361104 |
| PPP1R15B  | 0.42969123  | 0.01926163  |                        | 304799 |
| CBX7      | -0.637661   | 0.019262733 |                        | 362962 |
| CCM2      | 0.3330669   | 0.019262733 |                        | 305505 |
| ASB8      | -0.46658117 | 0.019325513 |                        | 315287 |
| SEC23B    | 0.46436992  | 0.019342592 |                        | 362226 |
| FGF22     | 0.56972426  | 0.019345097 |                        | 170579 |
| CAMSAP3   | -0.42870077 | 0.019371033 | RGD1307246             | 689074 |

|          |             |             |                            |           |
|----------|-------------|-------------|----------------------------|-----------|
| ATRIP    | 0.3553003   | 0.019394368 |                            | 301014    |
| CPSF7    | 0.39920464  | 0.019409502 | RGD1305441                 | 365407    |
| METRNL   | 0.83298993  | 0.019446347 |                            | 316842    |
| VEZT     | 0.27029166  | 0.019518334 |                            | 299738    |
| SFTPA1   | 1.0221486   | 0.019572165 | PSAP PSP-A SP-A Sftp1 Sftp | 24773     |
| TRIM3    | -0.3747128  | 0.019587457 | Berp Rnf22                 | 83616     |
| PGAM5    | 0.47645056  | 0.019648103 | RGD1312028                 | 288731    |
| RNF34    | -0.35055918 | 0.01968367  | Momo                       | 282845    |
| BMP7     | 0.5152237   | 0.01968367  | BMP-7                      | 85272     |
| IDI1     | 0.5555658   | 0.01968367  |                            | 89784     |
| SPTLC2   | 0.5762459   | 0.01968367  | Pomt2                      | 366697    |
| SCNN1G   | 1.0740247   | 0.01968367  | ENaC                       | 24768     |
| LARS     | 0.5295304   | 0.0197218   |                            | 291624    |
| EBF1     | -1.0893587  | 0.019734237 | Ebf Olf1                   | 116543    |
| ZFP503   | 0.55792856  | 0.019744331 | Nolz-1 Nolz1 Znf503        | 305687    |
| NTNG2    | 0.64086926  | 0.01978038  |                            | 311836    |
| CCNL2    | 0.6622199   | 0.01978038  |                            | 298686    |
| PKNOX2   | -0.5545568  | 0.019788744 |                            | 680549    |
| FBXO3    | -0.28655007 | 0.019788744 |                            | 690634    |
| PSME4    | 0.48247126  | 0.01982289  |                            | 498433    |
| GNB5     | -0.48535332 | 0.019877074 |                            | 83579     |
| BRAP     | 0.31765878  | 0.01990787  |                            | 687346    |
| RAB36    | -0.407907   | 0.019967712 |                            | 690407    |
| FAM163B  | 0.5645095   | 0.019967712 |                            | 685169    |
| F8       | 0.5986479   | 0.019967712 |                            | 302470    |
| PWWP2B   | 0.70017093  | 0.019967712 | Pwwp2                      | 361671    |
| GPR155   | -0.38577795 | 0.020069456 |                            | 311730    |
| TNIP2    | 0.6872239   | 0.020082528 |                            | 305451    |
| APBB1    | -0.36937773 | 0.02017821  | FE65                       | 29722     |
| ALG9     | -0.32408738 | 0.020257102 | Dibd1                      | 367083    |
| KDELR3   | 0.44304436  | 0.020277565 |                            | 315131    |
| MESDC1   | 0.28909972  | 0.020294696 |                            | 308795    |
| SEPHS1   | 0.33469778  | 0.02044995  |                            | 291314    |
| AIG1     | -0.42043447 | 0.020462526 | RGD1562920                 | 292486    |
| CCDC91   | -0.60597724 | 0.0204778   | Ccdc91                     | 103690009 |
| CALY     | -0.7370509  | 0.02062924  | Calcyon Drd1ip             | 192349    |
| FIP1L1   | 0.42561775  | 0.02062924  |                            | 289582    |
| GJB2     | 0.87944615  | 0.02066671  | CXN-26 Cx26                | 394266    |
| SNRNP40  | 0.26904786  | 0.020728698 | RGD1309198                 | 313056    |
| MPDU1    | -0.49394405 | 0.020758046 |                            | 303244    |
| ZMPSTE24 | 0.4096436   | 0.020809803 |                            | 313564    |
| LYRM7    | -0.7201525  | 0.020845149 |                            | 686506    |
| DHX33    | 0.6332344   | 0.021010872 |                            | 287464    |

|           |             |             |                             |        |
|-----------|-------------|-------------|-----------------------------|--------|
| MAP2K1    | 0.46555167  | 0.021087652 | Mek1                        | 170851 |
| TRAK1     | -0.44992325 | 0.021176055 | RGD1307844                  | 316085 |
| HCN3      | -0.58350736 | 0.021250414 |                             | 114245 |
| COX11     | 0.3311598   | 0.021282801 |                             | 690300 |
| DECR2     | -0.7600805  | 0.021355916 | Dcrakl putativeperoxisomal2 | 64461  |
| NEMP2     | 0.3647779   | 0.021356642 | RGD1560421 Tmem194b         | 503257 |
| MPHOSPH10 | 0.49548197  | 0.021419972 |                             | 293828 |
| FAM212A   | -0.98108214 | 0.021421747 | RGD1560778                  | 316001 |
| CDC45     | 0.44240254  | 0.021473555 | Cdc45l                      | 287961 |
| TRIM36    | 0.64333475  | 0.02148699  |                             | 291597 |
| ATF4      | 0.45487285  | 0.021494819 |                             | 79255  |
| NVL       | 0.39071107  | 0.021549927 |                             | 289323 |
| SHTN1     | -0.3805176  | 0.021569615 | RGD1311558 Shootin1         | 292139 |
| MCCC2     | -0.4543736  | 0.021715138 |                             | 361884 |
| TWIST2    | -1.073762   | 0.021729017 | Dermo1                      | 59327  |
| WDR34     | -0.35201335 | 0.021729643 |                             | 296618 |
| UBE2D1    | -0.5558267  | 0.02176936  |                             | 361831 |
| ANGPT2    | 0.9950371   | 0.02176936  | Agpt2 Ang-2                 | 89805  |
| MSTN      | -0.9719133  | 0.021809116 | Gdf8                        | 29152  |
| SPIN2A    | -0.66989213 | 0.021809116 | RGD1560898 Spin2            | 317395 |
| CDH7      | -0.7649024  | 0.02182333  | Cad7                        | 29162  |
| NOP14     | 0.37772366  | 0.021906657 | Nol14 RGD1305605            | 289724 |
| AZIN2     | -0.74265516 | 0.02193875  | Adc Azl2 ODC-p RGD156477    | 366473 |
| TUBGCP3   | 0.33934143  | 0.021972759 |                             | 306599 |
| VPS37C    | 0.3543599   | 0.022023605 | RGD1309258                  | 308178 |
| COG3      | 0.46740416  | 0.022023605 |                             | 361073 |
| SCLY      | -0.41821226 | 0.02206824  |                             | 363285 |
| MIDN      | 0.48622456  | 0.02206824  |                             | 314623 |
| SLC5A10   | 1.0390279   | 0.02206824  |                             | 303205 |
| MAP7D2    | 0.6383688   | 0.022087066 | Brelil Mtap7d2 RGD156485    | 317508 |
| DDX31     | 0.40275928  | 0.0221322   |                             | 311835 |
| ALDH3A2   | 0.41460213  | 0.0221322   | Aldh4 FALDH                 | 65183  |
| EHD3      | 0.45017213  | 0.02218002  | Ehd2                        | 192249 |
| CCDC116   | 0.72348905  | 0.022228336 | Sdf2l1                      | 287936 |
| SCHIP1    | 0.44048518  | 0.02227399  |                             | 295105 |
| NEUROD2   | -0.57589155 | 0.022393469 |                             | 54276  |
| ZFYVE1    | -0.39420262 | 0.022393469 |                             | 299188 |
| ST18      | 0.9323301   | 0.022393469 | Nzf3 r-MyT3                 | 266680 |
| SFI1      | -0.3593983  | 0.02240066  | RGD1560636                  | 305467 |
| IARS      | 0.5432607   | 0.02241786  | Iarsl                       | 306804 |
| THNSL1    | -0.41821316 | 0.02246256  |                             | 498805 |
| KRT16     | 1.0515325   | 0.022464631 | Ka16 Krt14 Krt14l           | 303530 |
| SLC39A10  | 0.41648242  | 0.022551391 |                             | 363229 |

|          |             |             |                         |           |
|----------|-------------|-------------|-------------------------|-----------|
| SSR1     | 0.23996204  | 0.022580769 | Ac2-238                 | 361233    |
| TMEM95   | 0.99867725  | 0.02259108  |                         | 691982    |
| MRPS12   | -0.37447104 | 0.022634368 |                         | 292758    |
| TMEM19   | -0.45933667 | 0.022701034 |                         | 299800    |
| RBM26    | 0.35263962  | 0.022743149 | RGD1308297              | 306137    |
| DPYD     | -0.40603387 | 0.022779727 |                         | 81656     |
| DPM2     | -0.34453657 | 0.022779727 |                         | 29640     |
| ICAM5    | 0.6350212   | 0.023105703 |                         | 313785    |
| NR1H4    | 1.0299447   | 0.02314844  | Fxr                     | 60351     |
| AMPD2    | -0.35778847 | 0.02316695  | Ampd                    | 362015    |
| SF3A1    | 0.30246204  | 0.023192532 |                         | 305479    |
| RTF1     | -0.37656203 | 0.023204755 | Gtl7                    | 366169    |
| BNIP1    | -0.47995958 | 0.02324584  | Snip1l1                 | 140932    |
| C2       | 0.65125006  | 0.023256697 |                         | 24231     |
| EIF5A    | 0.3161303   | 0.02325939  |                         | 287444    |
| PODXL2   | -0.46132386 | 0.02325958  | RGD1305815              | 297433    |
| GPRC5D   | 1.0628122   | 0.023274288 | RGD1563887              | 500349    |
| EBPL     | -0.81103384 | 0.023533585 |                         | 361054    |
| RNFT2    | -0.47578886 | 0.023533585 | RGD1560195 Tmem118      | 304521    |
| SDR39U1  | -0.47096366 | 0.023644267 | RGD1309307              | 361044    |
| SYNJ2BP  | 0.44070727  | 0.02364881  | Omp25                   | 64531     |
| HDGFRP3  | 0.23701152  | 0.0237519   |                         | 252941    |
| POFUT2   | 0.2858751   | 0.02376734  |                         | 309686    |
| AGPAT4   | 0.3172423   | 0.023829859 |                         | 170919    |
| ARHGAP26 | 0.6762538   | 0.023879444 |                         | 307459    |
| PTH2     | 1.0623065   | 0.0239008   | RGD1559447 Tifp39 Tip39 | 499149    |
| HNMT     | -0.7935456  | 0.023969265 |                         | 81676     |
| EXOC6B   | 0.51423776  | 0.024024148 | RGD1560638              | 500233    |
| ENHO     | -0.77281755 | 0.024061421 | RGD1565232              | 100912292 |
| ZFP598   | 0.38935694  | 0.024068875 | Ntrap Znf598            | 287119    |
| HEATR5B  | -0.47741523 | 0.024102585 |                         | 362683    |
| RAB26    | -0.6244838  | 0.024215654 |                         | 171111    |
| ZMAT3    | 0.60328597  | 0.024220372 | PAG608 Wig1             | 64394     |
| FBXW17   | -0.52784884 | 0.024243416 | RGD1566133              | 361219    |
| TRIM45   | -0.6569792  | 0.024276678 |                         | 295323    |
| SMIM3    | -0.43222162 | 0.02429222  | Nid67                   | 286910    |
| PCDHA3   | -0.4330155  | 0.024306206 |                         | 116780    |
| HIPK2    | 0.72276527  | 0.024310857 |                         | 362342    |
| DSG3     | 1.039333    | 0.024361389 |                         | 291752    |
| DUSP8    | -0.4727663  | 0.024405938 | Hb5 M3/6                | 361679    |
| NR1I3    | -0.47867706 | 0.024651837 | CAR                     | 65035     |
| MAP3K5   | -0.5257784  | 0.024662388 | Ask1 RGD1306565         | 365057    |
| RNMTL1   | 0.5180982   | 0.0246857   | RGD1309077 Rnmtl1       | 360569    |



|              |             |             |                   |           |
|--------------|-------------|-------------|-------------------|-----------|
| NXNL2        | 0.8030359   | 0.0246857   | Rdcvf2            | 689232    |
| CLTC         | 0.4065264   | 0.02470702  |                   | 54241     |
| DCTD         | 0.5415651   | 0.02474614  |                   | 290741    |
| GMPPB        | 0.35616145  | 0.024762154 | RGD1560458        | 363145    |
| SHISA2       | 0.67983407  | 0.024807438 | RGD1561256 Tmem46 | 498528    |
| N4BP2L2      | 0.4002115   | 0.024890715 |                   | 288416    |
| RGS7         | 0.4333365   | 0.024890715 |                   | 54296     |
| PLPPR3       | -0.36046594 | 0.025061086 | Lppr3 Prg-2       | 314614    |
| RGD1309870   | -0.9370675  | 0.025096979 |                   | 289778    |
| SMARCA2      | -0.3563186  | 0.025176045 |                   | 361745    |
| ATMIN        | 0.3480729   | 0.025186088 | Asciz RGD1305781  | 315037    |
| CCBL2        | -0.4399762  | 0.025223214 | Kat3              | 541589    |
| CIDEA        | 1.0524814   | 0.025334332 |                   | 291541    |
| CRIP2        | -0.36622167 | 0.025359625 | CRP2              | 338401    |
| HIRA         | 0.5345021   | 0.025456967 |                   | 363849    |
| TWISTNB      | 0.56608593  | 0.025475383 |                   | 362728    |
| ENTPD3       | -0.6030954  | 0.025481807 | NTPDase3          | 316077    |
| PMP22        | 0.30523092  | 0.025500532 | Gas-3             | 24660     |
| TRPC7        | -0.9399961  | 0.025614291 |                   | 282822    |
| KATNBL1      | 0.4713918   | 0.025625682 |                   | 691543    |
| USP24        | 0.584131    | 0.025641214 |                   | 313427    |
| RAVER1       | 0.44098482  | 0.025709024 | Raver1h           | 298705    |
| FNDC5        | -0.41621748 | 0.025931872 |                   | 260327    |
| PMAIP1       | 0.9662358   | 0.025931872 | Noxa              | 492821    |
| NR2F1        | -0.6552084  | 0.02600139  | COUP-TFI          | 81808     |
| PDIA5        | 0.75548553  | 0.02600139  |                   | 360722    |
| HPDL         | 0.6105229   | 0.026015805 | Gloxd1 RGD1310014 | 313521    |
| INHBB        | 0.5896933   | 0.02605992  |                   | 25196     |
| CAPN1        | -0.8966967  | 0.026103247 |                   | 29153     |
| EHF          | 1.021225    | 0.026108855 |                   | 295965    |
| ARFIP1       | 0.44239298  | 0.026112726 |                   | 60382     |
| MCL1         | 0.3782775   | 0.026118701 |                   | 60430     |
| SIKE1        | 0.24370816  | 0.026174108 | RGD1311316 Sike   | 362007    |
| SRPK2        | 0.29034224  | 0.026197786 |                   | 296753    |
| ZBTB9        | 0.33083826  | 0.026280228 | 3930402F13Rik     | 294289    |
| ZFP213       | -0.49818873 | 0.026280472 | Znf213            | 287094    |
| NTM          | -0.28882337 | 0.026316976 | Hnt RNU16845      | 50864     |
| AIFM1        | -0.3125007  | 0.026340885 | Aif Pdcd8         | 83533     |
| CASP8AP2     | 0.4594791   | 0.026352275 |                   | 313128    |
| LDHA         | 0.43479967  | 0.026459916 | Ldh1              | 24533     |
| VPS25        | -0.42980328 | 0.026719892 |                   | 681059    |
| SLC25A20     | -0.3190037  | 0.026738843 |                   | 117035    |
| LOC100910945 | -0.46788025 | 0.026746746 |                   | 100910945 |

|           |             |             |                    |        |
|-----------|-------------|-------------|--------------------|--------|
| SNCA      | -0.6050173  | 0.026817571 |                    | 29219  |
| PLEKHA1   | 0.25035676  | 0.026821863 | RGD1564153         | 361659 |
| AKT2      | 0.5054009   | 0.026897125 |                    | 25233  |
| KLF4      | 0.90540993  | 0.02692236  | GKLF               | 114505 |
| DEPDC5    | -0.40845168 | 0.026927    |                    | 305464 |
| NGB       | -0.6928232  | 0.026994903 |                    | 85382  |
| IVD       | -0.39578953 | 0.027016677 |                    | 24513  |
| PSMG1     | -0.47655776 | 0.027284902 | Dscr2              | 288236 |
| GORASP2   | 0.2791223   | 0.027284902 | GRASP55 Grs2       | 113961 |
| ATP10A    | 0.7995832   | 0.02731377  |                    | 365266 |
| TBL3      | 0.31145382  | 0.027333464 |                    | 287120 |
| QDPR      | -0.28917953 | 0.02734116  |                    | 64192  |
| SPSB4     | -0.6106562  | 0.027451115 | RGD1562307         | 300950 |
| TYR       | -0.9649715  | 0.02745966  | C                  | 308800 |
| RNASEH2A  | -0.5348562  | 0.02767752  |                    | 364974 |
| SDPR      | -0.81919664 | 0.027761383 |                    | 316384 |
| CACNG8    | 0.47115186  | 0.027788473 |                    | 140729 |
| IFNG      | 0.96064746  | 0.027807288 | IFNG2              | 25712  |
| RBL1      | 0.63687265  | 0.027824886 |                    | 680111 |
| RANBP6    | 0.26083702  | 0.027894719 |                    | 309326 |
| GPM6A     | -0.5804157  | 0.028009865 | M6a                | 306439 |
| TIMELESS  | 0.5192112   | 0.02803853  | Tim                | 83508  |
| SLITRK3   | -0.5794967  | 0.028080568 |                    | 310519 |
| CEP120    | -0.25485238 | 0.028080568 | Ccdc100 RGD1565619 | 307302 |
| MIPEP     | -0.30178705 | 0.02809246  |                    | 81684  |
| CDC42SE1  | 0.23582925  | 0.028155314 |                    | 499672 |
| SLC41A3   | -0.53476036 | 0.028180331 |                    | 641603 |
| TMEM8A    | -0.41689226 | 0.02822031  | M83 Tmem8          | 303004 |
| ACTN2     | -0.4354072  | 0.028269438 |                    | 291245 |
| VPS53     | -0.28410313 | 0.028292362 | RGD1311391         | 287535 |
| COMMD1    | -0.6125608  | 0.028329818 |                    | 289831 |
| CDH22     | 0.44884676  | 0.028351601 |                    | 29182  |
| HIST3H2A  | -0.5952332  | 0.028359205 | H2a                | 64646  |
| EFNA1     | -0.98023325 | 0.028365927 | B61                | 94268  |
| RNF111    | 0.2780099   | 0.028372575 |                    | 300813 |
| WDHD1     | 0.58513665  | 0.028372575 |                    | 305827 |
| LASP1     | -0.43409932 | 0.028413778 |                    | 29278  |
| CDK2AP1   | 0.51430607  | 0.028428685 |                    | 360804 |
| SDC2      | 0.40368718  | 0.02844198  | HSPG               | 25615  |
| DGUOK     | -0.7135703  | 0.028450714 |                    | 297389 |
| TNFRSF11A | -0.5661064  | 0.0285034   | RANK RGD1563614    | 498206 |
| SPATA2L   | 0.43527207  | 0.028505994 | RGD1560840         | 498963 |
| TANGO2    | -0.4104154  | 0.028557584 | RGD1310348         | 360738 |

|            |             |             |                           |           |
|------------|-------------|-------------|---------------------------|-----------|
| LYAR       | 0.6589188   | 0.028607719 |                           | 289707    |
| TAF5L      | 0.6951462   | 0.028670723 |                           | 307927    |
| FIBP       | -0.52428794 | 0.028681373 |                           | 282837    |
| N4BP2L1    | -0.5847066  | 0.028689358 |                           | 498131    |
| PCBP2      | 0.33674398  | 0.028723367 |                           | 363005    |
| RGD1309104 | 0.38246995  | 0.028741185 |                           | 289084    |
| EIF2AK4    | -0.41502848 | 0.028792525 |                           | 114859    |
| DPYSL2     | -0.5521578  | 0.02881728  | Crmp2 TOAD-64             | 25416     |
| NAAA       | -0.9980757  | 0.02890205  | Asahl                     | 497009    |
| CHMP6      | -0.37391767 | 0.028960612 | RGD1565325                | 287873    |
| ACKR2      | -0.9902222  | 0.02896535  | Ccbp2 D6                  | 140473    |
| TMBIM6     | 0.24474776  | 0.02903055  | Ab1-011 Ac1-149 Cc1-27 Te | 24822     |
| SAPCD1     | -0.5870442  | 0.029040692 | Ng23                      | 406170    |
| GPAT4      | 0.29193175  | 0.029048502 | Agpat6 RGD1310520         | 290843    |
| GPR26      | 0.79486054  | 0.02906515  |                           | 192153    |
| DMC1       | -0.954366   | 0.029074695 | Dmc1h                     | 362960    |
| ACAA1      | -0.3464555  | 0.029277159 | Acaa Acaa1a Pktaa         | 24157     |
| MKRN1      | -0.32218188 | 0.029280579 |                           | 296988    |
| GDAP2      | 0.2811545   | 0.02932361  |                           | 362004    |
| GPANK1     | -0.55446744 | 0.029328948 | Bat4                      | 415064    |
| BLOC1S5    | -0.52388054 | 0.029396914 | Muted                     | 306868    |
| MAPRE1     | 0.30936545  | 0.029399548 | Eb1                       | 114764    |
| ZIC2       | 0.5563749   | 0.029415943 |                           | 361096    |
| SLC2A13    | -0.44457495 | 0.029434267 | Hmit                      | 171147    |
| TIMP3      | 0.66125244  | 0.029497175 |                           | 25358     |
| SLC2A1     | 0.4447203   | 0.029523157 | GLUTB GTG1 Glut1 Gtg3 RA  | 24778     |
| GFRA2      | 0.7065282   | 0.029685542 | Retl2                     | 25136     |
| RARS       | 0.41149497  | 0.029705409 |                           | 287191    |
| FAF1       | 0.34779784  | 0.029716888 |                           | 140657    |
| TPM2       | 0.8883627   | 0.029716888 |                           | 500450    |
| SPCS3      | 0.35186204  | 0.029738758 |                           | 680782    |
| NUDT14     | -0.6949743  | 0.029768933 |                           | 299346    |
| TRAPPC2B   | -0.56372106 | 0.02983081  |                           | 100910318 |
| SESN2      | 0.63824654  | 0.029846989 | RGD1566319                | 502988    |
| EXOC3L1    | -0.6660272  | 0.029977003 | Exoc3l RGD1311132         | 291961    |
| MYPOP      | -0.6344545  | 0.03004929  | P42pop RGD1565160         | 499090    |
| SYT13      | -0.48842904 | 0.030050488 |                           | 80977     |
| LOC689986  | -0.37586313 | 0.030110314 |                           | 689986    |
| IFT122     | -0.36788243 | 0.030110314 | Wdr10                     | 312651    |
| SWSAP1     | -0.48390603 | 0.03014336  | RGD1308026                | 363029    |
| LRRC34     | -0.8412541  | 0.030171528 | RGD1565052                | 499589    |
| ZHX2       | 0.55784607  | 0.030193167 |                           | 314988    |
| FBXL14     | 0.4120996   | 0.030285114 |                           | 312675    |

|            |             |             |                       |           |
|------------|-------------|-------------|-----------------------|-----------|
| SLC4A5     | -0.92623943 | 0.030432098 | NBC4                  | 297386    |
| SRCIN1     | -0.5569027  | 0.030438466 | P140 Snip             | 56029     |
| IRX6       | 1.0180786   | 0.030557713 | RGD1564830            | 307715    |
| TRERF1     | -0.6184687  | 0.03057336  |                       | 316219    |
| WNT16      | -1.0102184  | 0.030616408 |                       | 500047    |
| ZFP697     | 0.8302689   | 0.030626684 | RGD1308711 Znf697     | 295310    |
| CACNB4     | 0.641858    | 0.030679084 |                       | 58942     |
| THSD7A     | -0.6736665  | 0.030782651 | RGD1566201            | 500032    |
| PCDHGA2    | -0.493664   | 0.030789359 |                       | 498846    |
| LARS2      | -0.39411244 | 0.030789359 |                       | 363172    |
| CUL2       | 0.24325298  | 0.030789359 |                       | 361258    |
| CLINT1     | 0.54087186  | 0.030789359 | Clint Enth Epn4       | 360515    |
| NIT1       | -0.2994909  | 0.030802669 |                       | 289222    |
| AARS       | 0.37740648  | 0.030811546 |                       | 292023    |
| LHFPL5     | -0.72176534 | 0.030828876 | Tmhs                  | 294303    |
| BCL2L11    | -0.5232826  | 0.030841896 | Bim BimL              | 64547     |
| HDX        | 0.7631826   | 0.030876638 | RGD1563666            | 317617    |
| APCS       | 0.9416904   | 0.030882161 | Sap                   | 29339     |
| SLC4A10    | -0.45854294 | 0.03095376  | NCBE                  | 295645    |
| CCDC65     | -0.37604862 | 0.03095376  |                       | 362994    |
| RHOT1      | 0.26838666  | 0.031272113 |                       | 303351    |
| STAT2      | -0.37317953 | 0.031295735 |                       | 288774    |
| SCN1A      | -0.72736907 | 0.031329434 |                       | 81574     |
| STEAP2     | 0.40834293  | 0.03136245  |                       | 312052    |
| RAMP2      | -0.6928447  | 0.031428874 |                       | 58966     |
| CPT1C      | -0.35671914 | 0.031512763 | CPT IC CPT1-B CPTI-B  | 308579    |
| FBXL20     | -0.6405506  | 0.031550296 | Fbl2 Fbxl2            | 64039     |
| NRG1       | 0.55282503  | 0.0316391   |                       | 112400    |
| S100PBP    | -0.5235443  | 0.031642627 | RGD1564943            | 500551    |
| NAA40      | 0.51848483  | 0.031666256 | Nat11 RGD1565838      | 361718    |
| IL25       | -1.0208933  | 0.031695936 | RGD1561632            | 501996    |
| DCPS       | -0.34323475 | 0.031695936 | Hint-5                | 266605    |
| CORO2A     | -0.488291   | 0.031715386 |                       | 313235    |
| RNF5       | -0.45976725 | 0.031731933 |                       | 407784    |
| HK2        | 0.47732583  | 0.03179401  |                       | 25059     |
| GEMIN8     | -0.41399086 | 0.0318039   | Fam51a1               | 363462    |
| POU1F1     | 1.0202218   | 0.0318039   | GHF1 GHF1A PIT1Z Pit1 | 25517     |
| DCAF7      | -0.3669658  | 0.031858068 | RGD1305140 Wdr68      | 303602    |
| ATP6V1B2   | 0.42750973  | 0.031886395 | Atp6b1b2 Atp6b2 Vatb  | 117596    |
| SMAP2      | 0.3646476   | 0.03202195  | RGD1308418 Smap1l     | 298500    |
| ATP11A     | 0.49652663  | 0.03202961  | Ua20                  | 306600    |
| DDB2       | -0.5134682  | 0.03221289  |                       | 100362121 |
| RGD1308601 | 0.568617    | 0.0323027   |                       | 307249    |

|           |             |             |                        |        |
|-----------|-------------|-------------|------------------------|--------|
| TRIP12    | 0.48558667  | 0.03232823  | Gtl6 TRIP-12           | 316575 |
| RAD21     | -0.26925308 | 0.032404546 |                        | 314949 |
| RGS5      | 0.9978223   | 0.03242148  |                        | 54294  |
| POGLUT1   | 0.39570394  | 0.032437116 | Ktelc1 RGD1306248      | 288091 |
| PATL1     | 0.5256846   | 0.032437116 | Pat1b RGD1305514       | 361736 |
| SLC1A4    | 0.54220474  | 0.032437116 | ASCT1                  | 305540 |
| XRCC4     | -0.39937168 | 0.032484468 |                        | 309995 |
| LRRC41    | 0.385255    | 0.032493487 | RGD1311221             | 362566 |
| LOC680039 | 0.46632928  | 0.032493487 |                        | 680039 |
| TLK2      | 0.31502602  | 0.032496337 |                        | 303592 |
| NCSTN     | -0.26698932 | 0.032625727 |                        | 289231 |
| SPATS2L   | -0.40924394 | 0.032649647 | RGD1309930             | 316426 |
| MPP4      | 0.7599157   | 0.032875896 | Dlg6                   | 58808  |
| SLC5A8    | 1.0145775   | 0.033064038 | RGD1564146             | 500820 |
| BARHL2    | 0.9757056   | 0.033074524 | Barh MBH1              | 65050  |
| ERF       | 0.47308475  | 0.033135038 |                        | 292721 |
| 42982     | -0.764245   | 0.033291806 | EG3-1RVC EG3RVC Pnutl2 | 287606 |
| B4GALT5   | 0.33854157  | 0.033291806 |                        | 362275 |
| MTERF2    | -0.63347954 | 0.033466984 | Mterfd3 RGD1311836     | 366856 |
| USF1      | -0.32495648 | 0.033466984 |                        | 83586  |
| PKNOX1    | 0.6513941   | 0.03349886  |                        | 294322 |
| LOXHD1    | 1.0126847   | 0.033543635 |                        | 291427 |
| PANK4     | 0.3367602   | 0.03362458  | Fang1                  | 171053 |
| DHRS3     | 0.47700343  | 0.033664837 |                        | 313689 |
| PHF1      | -0.4050112  | 0.033805452 | Tctex3                 | 294287 |
| CDC14B    | 0.7017648   | 0.033805452 |                        | 361195 |
| ZFYVE16   | -0.5173794  | 0.033865884 | RGD1564784             | 499508 |
| AKR1E2    | -0.483803   | 0.033865884 | Akr1cl2 Akr1e1         | 307091 |
| CHURC1    | -0.601889   | 0.033934236 |                        | 299154 |
| USP49     | -0.6277844  | 0.034041964 | RGD1310513             | 316211 |
| CRYM      | -0.53354144 | 0.03418983  | CDK108                 | 117024 |
| SRSF9     | 0.3987796   | 0.034256175 | Sfrs9                  | 288701 |
| CDPF1     | -0.5317033  | 0.034327634 | RGD1306001             | 362975 |
| RPH3A     | -0.6514723  | 0.034347903 |                        | 171039 |
| CCDC53    | -0.4767593  | 0.034459036 | RGD1563761             | 299707 |
| PHF14     | -0.41190183 | 0.034459036 | RGD1563764             | 500030 |
| MINK1     | 0.39588234  | 0.034459036 | MEKKK 6                | 303259 |
| NET1      | -0.32405576 | 0.034461897 |                        | 307098 |
| TLE3      | 0.3218495   | 0.03449508  | Esp3                   | 84424  |
| PAPD4     | 0.43107226  | 0.03457216  |                        | 361878 |
| MESP1     | -0.97030115 | 0.034614347 |                        | 308766 |
| GABRQ     | 0.72086304  | 0.034620695 |                        | 65187  |
| RAB14     | 0.27399725  | 0.03472653  |                        | 94197  |

|          |             |             |                       |           |
|----------|-------------|-------------|-----------------------|-----------|
| MFSD14B  | 0.24501477  | 0.034771945 | Hiatl1 RGD1308377     | 306687    |
| MCM10    | 0.53480804  | 0.034814026 |                       | 307126    |
| TNFAIP2  | -0.80376416 | 0.034970935 |                       | 299339    |
| RASSF6   | -1.0063156  | 0.03497475  |                       | 305251    |
| VRK3     | -0.3422794  | 0.035095934 |                       | 361565    |
| SEC61A2  | 0.2270908   | 0.03526537  |                       | 361273    |
| PEX5     | 0.5473612   | 0.03528934  | PTS1-BP PTS1R         | 312703    |
| NME7     | -0.45875064 | 0.03532765  | Nm23-r7               | 171566    |
| DDX19B   | 0.31900993  | 0.035466228 | Zd10a                 | 690693    |
| DNMT1    | 0.34042725  | 0.035562135 |                       | 84350     |
| GPRASP1  | -0.24657959 | 0.035594195 | pips                  | 171407    |
| CCNO     | -0.83561397 | 0.03564552  | RGD1565217            | 499528    |
| CACUL1   | 0.45192146  | 0.03565909  | RGD1308127            | 365493    |
| PLAT     | 0.5291216   | 0.03566246  | PATISS tPA            | 25692     |
| MRGBP    | 0.6698152   | 0.035740416 | RGD1308612            | 311713    |
| PDE12    | 0.5205767   | 0.03574115  | LRRGT00074 RGD1310975 | 306231    |
| B3GNT3   | -0.95138377 | 0.03587172  |                       | 290638    |
| TGFB1    | 0.6852653   | 0.035985652 | Tgfb                  | 59086     |
| CHML     | 0.8247513   | 0.036103465 |                       | 689102    |
| CDK5RAP3 | -0.41523105 | 0.03611087  | C53                   | 80278     |
| TSPAN15  | -0.38312688 | 0.0361306   |                       | 679462    |
| PPP2R5A  | 0.3153681   | 0.036137    |                       | 312754    |
| PDZD7    | -0.5707858  | 0.036299657 | Pdzk7                 | 293996    |
| JPH3     | -0.42839488 | 0.036348023 |                       | 307916    |
| SLK      | 0.5161005   | 0.036348023 | Stk2                  | 54308     |
| MMP11    | -0.59045744 | 0.03639457  | ST3                   | 25481     |
| ALAS1    | 0.27712983  | 0.0364049   | ALAS                  | 65155     |
| SLC35D3  | 0.7441862   | 0.03642329  |                       | 308717    |
| NOP2     | 0.30664676  | 0.036445048 | Nol1                  | 314969    |
| ZFP39    | -0.43446797 | 0.036447357 |                       | 303173    |
| ZFP397   | 0.6151469   | 0.036568984 | Znf397                | 100909408 |
| ITPRIPL2 | 0.9190477   | 0.03661702  | RGD1564255            | 499253    |
| ALDH1L2  | -0.44637772 | 0.0366413   | RGD1309458            | 299699    |
| MCEE     | -0.5760194  | 0.036644287 |                       | 293829    |
| ELP5     | 0.28309202  | 0.036664568 | DERP6 Rai12           | 287446    |
| SNN      | -0.3975091  | 0.03668417  |                       | 29140     |
| TUBG2    | -0.46170938 | 0.03676427  |                       | 680991    |
| CDK5     | -0.45083693 | 0.03676427  |                       | 140908    |
| TUBA3B   | 0.98023945  | 0.036987737 | RGD1565155            | 500363    |
| PPWD1    | 0.34223482  | 0.037053958 | RGD1310204            | 294711    |
| ZC3H8    | -0.52011245 | 0.037083894 | Zc3hdc8               | 311414    |
| SC5D     | 0.3328679   | 0.037091367 | Sc5dl                 | 114100    |
| SLC35D1  | 0.5396388   | 0.037110966 |                       | 298280    |

|            |             |             |                     |        |
|------------|-------------|-------------|---------------------|--------|
| RGD1309079 | 0.42236546  | 0.037203502 | Ab2-095             | 315891 |
| SZRD1      | 0.2651899   | 0.03728946  | C1orf144 RGD1560286 | 500575 |
| PGGT1B     | 0.33448288  | 0.03728946  |                     | 81746  |
| CROCC      | -0.508079   | 0.037360642 |                     | 313663 |
| ZGPAT      | 0.29030257  | 0.03737169  | RGD1310801          | 296478 |
| ADPGK      | 0.31411034  | 0.03744561  | RGD1306103          | 315722 |
| HTR5A      | -0.67148125 | 0.037459828 | 5HT5A MR22          | 25689  |
| PERP       | 0.590914    | 0.037459828 |                     | 292949 |
| RPS6KB1    | 0.37649137  | 0.03754645  |                     | 83840  |
| CREG1      | -0.26421645 | 0.03756935  | Creg                | 289185 |
| NMRK1      | -0.60891306 | 0.037603244 | Nrk1                | 499330 |
| ARRDC3     | -0.42791298 | 0.037853606 | LRRGT00048          | 309945 |
| ARHGEF2    | -0.50566804 | 0.038085505 |                     | 310635 |
| ARHGEF25   | -0.41118413 | 0.0381102   | Geft                | 314904 |
| COIL       | 0.32240334  | 0.038111575 |                     | 50998  |
| NKAP       | -0.59048504 | 0.038151268 | 2610020o08rik       | 298342 |
| ETHE1      | -0.36724612 | 0.038245164 |                     | 292710 |
| NBR1       | -0.32224736 | 0.038245164 | Ca125 RGD1311421    | 303554 |
| RPF1       | 0.58397985  | 0.038253207 | Bxdc5               | 499725 |
| SLC37A1    | 0.5571413   | 0.03828822  |                     | 294321 |
| SRSF2      | 0.53308135  | 0.038305525 | Sfrs2               | 494445 |
| ALG10      | 0.7551815   | 0.038305525 | Alg10b KCR1         | 245960 |
| SLC16A8    | 0.9730974   | 0.038305525 | Mct3                | 65200  |
| TRIM54     | -0.9230427  | 0.038337693 | Rnf30               | 362708 |
| PKM        | 0.5263086   | 0.038356286 | PKM12 Pk3 Pkm2      | 25630  |
| KIT        | -0.5006792  | 0.038370207 |                     | 64030  |
| FDXR       | -0.5313651  | 0.0385795   | AR                  | 79122  |
| SNX7       | 0.398886    | 0.038629517 |                     | 310815 |
| ENPP1      | 0.72993696  | 0.038642246 | Npps Pc1            | 85496  |
| PAWR       | 0.5601135   | 0.03864341  | Par-4 Par4          | 64513  |
| SIRT7      | 0.42087793  | 0.038659964 |                     | 303745 |
| CDC42EP3   | -0.44628868 | 0.03866876  |                     | 313838 |
| LSG1       | 0.32500356  | 0.03869334  | RGD1309089          | 288029 |
| ZFP46      | -0.440568   | 0.03882037  |                     | 298558 |
| TMEM41A    | 0.5112608   | 0.03897502  |                     | 681708 |
| ADCYAP1    | 0.6414165   | 0.03897502  | Pacap               | 24166  |
| CCSAP      | 0.43907428  | 0.03899341  | RGD1563235          | 307926 |
| ZFP513     | 0.26082954  | 0.039262705 | Znf513              | 313913 |
| CPTP       | -0.57773244 | 0.03937554  | Gltpd1              | 313771 |
| FBXO44     | -0.54700243 | 0.03943288  | RGD1562463          | 500587 |
| HSPA4      | 0.30015755  | 0.039481673 | Hsp110 Hsp70 irp94  | 266759 |
| ANKRD52    | 0.68396103  | 0.039582606 | RGD1307124          | 362811 |
| NOSIP      | -0.43927485 | 0.03969875  |                     | 292894 |

|         |             |             |                            |           |
|---------|-------------|-------------|----------------------------|-----------|
| RNF141  | -0.36530054 | 0.039720736 |                            | 308900    |
| TMEM179 | -0.5009015  | 0.039815802 | RGD1310269                 | 314472    |
| RAB11B  | -0.41509232 | 0.039815802 |                            | 79434     |
| CHEK1   | 0.50829446  | 0.039869428 |                            | 140583    |
| RAB3A   | -0.39905143 | 0.040116232 | RAB3                       | 25531     |
| ERAL1   | -0.3119239  | 0.040128108 |                            | 363646    |
| TACC1   | 0.471592    | 0.0402329   | Tacc1a                     | 306562    |
| FXYD6   | -0.32307225 | 0.040235706 | Php                        | 63847     |
| PHF21B  | 0.6334849   | 0.040290035 | RGD1308739                 | 300117    |
| GORAB   | 0.44201726  | 0.0403276   | Scyl1bp1                   | 304923    |
| SIL1    | -0.56205726 | 0.040359624 |                            | 291673    |
| AK2     | 0.5197275   | 0.04037918  |                            | 24184     |
| UBN1    | 0.28962803  | 0.04038311  |                            | 302935    |
| PIAS3   | -0.45282632 | 0.04042212  |                            | 83614     |
| JPH4    | -0.51739067 | 0.04046165  |                            | 445271    |
| PGD     | -0.33300146 | 0.040510073 | Cc2-27                     | 100360180 |
| ACADS   | -0.35135093 | 0.040542137 | Scad                       | 64304     |
| CAP2    | 0.34800616  | 0.04064034  |                            | 116653    |
| ZBTB8B  | -0.50454503 | 0.040657874 | RGD1562327 Zbtb8 Zbtb8l    | 500553    |
| PADI2   | -0.50108236 | 0.040773638 | Pdi2                       | 29511     |
| ERLEC1  | -0.46808836 | 0.040773638 | RGD1306508                 | 289874    |
| TCTN1   | -0.3580323  | 0.040773638 | RGD1566266                 | 304486    |
| ST8SIA2 | -0.69829434 | 0.040880658 | Siat8b                     | 117523    |
| VWA5B2  | -0.4674993  | 0.040880658 | RGD1564491                 | 303812    |
| HNRNPAB | 0.33188716  | 0.040880658 | A1F-C1 Hnrapab             | 83498     |
| FGF7    | 0.96359503  | 0.040880658 | Kgf                        | 29348     |
| LHX4    | 0.79457676  | 0.040988516 |                            | 360858    |
| MED4    | -0.36088556 | 0.041012213 | Vdrip                      | 306030    |
| YTHDF1  | 0.23782311  | 0.041012213 |                            | 296467    |
| CDCA7   | 0.40414777  | 0.041012213 |                            | 311742    |
| CBLB    | -0.6886468  | 0.041081518 |                            | 171136    |
| SAP30BP | 0.32180488  | 0.041081518 | RGD1565537                 | 360662    |
| METTL6  | 0.3548717   | 0.04120367  |                            | 290564    |
| MYLK    | -0.6736588  | 0.04122695  |                            | 288057    |
| ITPR1   | -0.43509513 | 0.041246727 | I145TR IP3R1 InsP3R InsP3R | 25262     |
| CABLES1 | -0.31079614 | 0.041444834 |                            | 307585    |
| SIRT3   | -0.3815202  | 0.041483484 |                            | 293615    |
| OBFC1   | -0.48785168 | 0.041653346 |                            | 294025    |
| LGMN    | -0.4387056  | 0.04174131  | Prsc1                      | 63865     |
| SOAT1   | 0.6703569   | 0.04174131  | Acat-1                     | 81782     |
| CDH9    | -0.8313626  | 0.041754942 |                            | 29163     |
| ICA1    | -0.4694552  | 0.04176689  | Ica69                      | 81024     |
| KDM1B   | -0.31811586 | 0.04183083  | Aof1                       | 306819    |



|            |             |             |                          |        |
|------------|-------------|-------------|--------------------------|--------|
| CEP57L1    | -0.5037394  | 0.041924905 | cep57R                   | 294519 |
| CAMK1      | -0.48706043 | 0.042015456 | Camki Gaip               | 171503 |
| SRFBP1     | 0.40503505  | 0.042069778 | p49/STRAP                | 291469 |
| TRIM2      | -0.30773902 | 0.0421367   |                          | 361970 |
| TSPAN31    | 0.2815228   | 0.042165656 | Sas                      | 362890 |
| TNRC18     | -0.57466465 | 0.042166073 | Zfp469                   | 304302 |
| GPR101     | 0.9520749   | 0.042299286 | RGD1564196               | 317608 |
| GPX3       | -0.553081   | 0.042353693 | GPx-3 GPx-P GSHPx-3 GSHP | 64317  |
| ZFP521     | 0.37923446  | 0.042425748 | Znf521                   | 307579 |
| PRR5       | -0.6435585  | 0.0425764   | Protor1                  | 315189 |
| RASGRP1    | 0.4747592   | 0.042591874 | Rasgrp                   | 29434  |
| GGACT      | -0.52912664 | 0.04270827  | A2ld1                    | 290500 |
| GTF2F1     | 0.2910501   | 0.04270827  |                          | 316123 |
| POLR1E     | 0.46758574  | 0.042786576 | Praf1 RGD1565773         | 313245 |
| MYRIP      | 0.47532845  | 0.043024935 | Slac2c                   | 360034 |
| MGC95210   | -0.425667   | 0.043049075 |                          | 287798 |
| ANK1       | 0.63647246  | 0.043114673 |                          | 306570 |
| SOCS6      | 0.3937871   | 0.043192185 |                          | 307200 |
| LOC688390  | -0.661496   | 0.04323364  |                          | 688390 |
| CSPG5      | -0.47791874 | 0.043257702 | Caleb Ngc                | 50568  |
| TIA1       | -0.39518464 | 0.043443162 |                          | 312510 |
| GM2A       | -0.31562626 | 0.043772697 |                          | 282838 |
| FBP2       | -0.8136375  | 0.043803196 | FBPase                   | 114508 |
| ZFP367     | 0.37631714  | 0.043803196 | Znf367                   | 306695 |
| CRK        | 0.55220175  | 0.043810494 | Crko                     | 54245  |
| LYPLA2     | 0.41494977  | 0.043842703 |                          | 83510  |
| RGD1565033 | -0.5849035  | 0.04386195  |                          | 498014 |
| EIF2B5     | 0.26243556  | 0.04387254  |                          | 192234 |
| FAM192A    | -0.44237024 | 0.044030946 | Nip30 RGD1307433         | 307652 |
| EPN2       | 0.2372426   | 0.044030946 |                          | 60443  |
| SV2A       | -0.44024414 | 0.044125818 | Sv2                      | 117559 |
| OVCA2      | -0.4248868  | 0.04432062  | RGD1564623               | 497954 |
| CD226      | -0.8940893  | 0.044405293 |                          | 307199 |
| GLRA2      | -0.4702876  | 0.04443878  | RNNEOGLY                 | 24397  |
| NUP62      | 0.32010227  | 0.044462617 | Np62                     | 65274  |
| TSC22D1    | -0.30597922 | 0.04449759  | TS22A TSC-22 Tgfb1i4     | 498545 |
| MYBL2      | 0.502166    | 0.04449759  |                          | 296344 |
| TOLLIP     | 0.3704476   | 0.044588216 |                          | 361677 |
| FPGS       | 0.30807278  | 0.04468685  |                          | 687266 |
| PPM1J      | -0.68527406 | 0.044715635 |                          | 295341 |
| ADSS       | -0.2692896  | 0.044726953 | Adss2                    | 289276 |
| FOSL2      | 0.8236007   | 0.044848252 | Fra2                     | 25446  |
| NEK1       | -0.42037255 | 0.044919748 |                          | 290705 |

|          |             |             |                          |        |
|----------|-------------|-------------|--------------------------|--------|
| FUT11    | 0.37389797  | 0.044919748 |                          | 286971 |
| LDLR     | 0.5501626   | 0.044919748 | LDLRA                    | 300438 |
| PA2G4    | 0.2990845   | 0.04504876  | Ebp1                     | 288778 |
| PCYT1A   | 0.5348623   | 0.045138597 | CCT-alpha CTP            | 140544 |
| PPP1CA   | 0.24071914  | 0.045298655 | PP1alpha                 | 24668  |
| TBC1D10A | 0.41351005  | 0.045365326 | Tbc1d10                  | 360968 |
| RHBDF1   | 0.40119374  | 0.045441378 |                          | 303008 |
| HES1     | 0.45293653  | 0.045441378 |                          | 29577  |
| ADAMTS10 | 0.37756658  | 0.045457304 |                          | 314655 |
| MYH9L1   | 0.5848633   | 0.045488283 |                          | 25745  |
| BTBD6    | -0.35536626 | 0.045565758 |                          | 690367 |
| DYNC2LI1 | -0.5108052  | 0.045751467 | RGD1310286               | 298767 |
| SLCO4A1  | -0.40388513 | 0.045751467 | OATP-E Slc21a12          | 171144 |
| SHISA5   | -0.38090327 | 0.045767896 |                          | 301013 |
| FANCE    | -0.50799674 | 0.045877352 | RGD1561045               | 309643 |
| CNP      | -0.27311778 | 0.046021413 | CNPF CNPI CNPII Cnp1     | 25275  |
| C2CD2L   | -0.36675042 | 0.046023235 | Tmem24                   | 300666 |
| MPV17L2  | -0.42423078 | 0.046042807 | RGD1308064               | 290645 |
| ABHD17B  | 0.38789335  | 0.04624426  | Cgi67l Fam108b1 RGD13052 | 309399 |
| SYNGR4   | -0.89858645 | 0.046292707 |                          | 292916 |
| DDIT4    | -0.54277253 | 0.04639547  | Rtp801                   | 140942 |
| SLC1A6   | -0.644496   | 0.04661186  | EAAT4                    | 84012  |
| ZFP709   | 0.4258446   | 0.046780914 | Hit40 Znf14              | 266773 |
| FGF13    | -0.47861964 | 0.04680864  | FGF-13                   | 84488  |
| EEF2K    | -0.41597348 | 0.046873935 | SMEF2K                   | 25435  |
| USP31    | 0.6709861   | 0.046946503 |                          | 308959 |
| SYNGR1   | -0.5001973  | 0.04698841  |                          | 29205  |
| FAM160A2 | 0.4618909   | 0.047051255 | FHIP                     | 293343 |
| TTC30B   | -0.37847698 | 0.047068115 |                          | 499814 |
| ERO1A    | 0.30140406  | 0.04717244  | Ero1l                    | 171562 |
| PMVK     | -0.48543307 | 0.04733122  |                          | 310645 |
| RALGAPA1 | 0.45262334  | 0.047342747 | GRYPE Garnl1 Tulip1 p240 | 56785  |
| MAN1A2   | 0.58379173  | 0.04750291  | Man1b                    | 295319 |
| GPC1     | 0.44138172  | 0.047604747 | HSPG M12 HSPGM12         | 58920  |
| NTN1     | 0.6117326   | 0.047619216 | netrin-1                 | 114523 |
| ZBED4    | 0.6373196   | 0.04774105  |                          | 315211 |
| RBM33    | 0.62802976  | 0.047770053 | RGD1310651               | 362297 |
| CH25H    | 0.8603463   | 0.047844984 |                          | 309527 |
| RHPN2    | -0.6892688  | 0.047902454 |                          | 308516 |
| FAT4     | -0.68607205 | 0.04809833  | RGD1564291               | 310341 |
| GABRD    | -0.7051563  | 0.048128575 | GABAA-RD                 | 29689  |
| HACD3    | 0.26696298  | 0.04816285  | Ptplad1 RGD1565496       | 300783 |
| DEAR     | 0.41171983  | 0.04816285  |                          | 446170 |

|          |             |             |                    |           |
|----------|-------------|-------------|--------------------|-----------|
| HOMEZ    | -0.4243091  | 0.048186395 |                    | 260325    |
| DPY19L1  | 0.24113286  | 0.048194468 | RGD1305822         | 315496    |
| MED11    | -0.46381506 | 0.04836857  | RGD1563202         | 287456    |
| HID1     | -0.34535822 | 0.04836857  | RGD1311422         | 287822    |
| RASSF5   | 0.42041242  | 0.04836857  | Maxp1 Nore1        | 54355     |
| MEST     | 0.52117264  | 0.04836857  |                    | 58827     |
| SPRN     | -0.7253101  | 0.048448265 |                    | 541462    |
| WDR46    | 0.33697125  | 0.04854942  | Bing4              | 309628    |
| GMPPA    | -0.34430286 | 0.048574977 |                    | 501167    |
| WDR26    | 0.35423997  | 0.048592504 | RGD1565589         | 498301    |
| SENP7    | -0.26622754 | 0.04878576  |                    | 288167    |
| ZFP583   | 0.3633975   | 0.04878576  | RGD1562044         | 499068    |
| SLC25A14 | -0.30390215 | 0.048834655 | Bmcp1              | 85263     |
| ARHGEF11 | -0.52531695 | 0.048962355 | Gtrap48            | 78966     |
| SQLE     | 0.28197297  | 0.048962355 |                    | 29230     |
| LMO1     | -0.5265091  | 0.049009074 | Dat1 Lmo3          | 245979    |
| SLC17A6  | 0.6108406   | 0.049009074 | Dnpi Vglut2        | 84487     |
| PACSIN1  | 0.6023192   | 0.04935037  |                    | 29704     |
| HEXDC    | -0.33909637 | 0.049379133 |                    | 100216475 |
| SCYL3    | 0.4040984   | 0.049412906 | RGD1308992         | 360866    |
| UMPS     | 0.3245573   | 0.049528614 |                    | 288051    |
| HSDL1    | -0.39937967 | 0.04956813  | RGD1308433         | 361418    |
| ISOC1    | -0.25592902 | 0.049739197 | DR-NR#1 RGD1307632 | 364879    |
| CDC25A   | 0.31931496  | 0.049744014 |                    | 171102    |
| YARS2    | 0.38417423  | 0.049744014 | CGI-04 RGD1311696  | 287924    |
| NR4A3    | 0.46416077  | 0.049744014 | NOR-2              | 58853     |
| SHISA8   | 0.7559386   | 0.049744014 | RGD1563996         | 315163    |
| RBPMS    | 0.8294909   | 0.049915213 | RGD1561067         | 498642    |
| KLHL25   | -0.38356707 | 0.04996569  | RGD1310815         | 293023    |
| ENPP5    | -0.21971719 | 0.04996569  | E-NPP 5 Npp5       | 316249    |
| ZFP777   | 0.28266618  | 0.04996569  | RGD1566056 Znf777  | 502764    |
| TNFAIP1  | -0.2973561  | 0.049998462 | Edp1               | 287543    |
| PABPN1   | 0.28493616  | 0.049998462 |                    | 116697    |

**W+B and RX2+B v V+B LIST**

| Gene Symbol | Gene ID | log2fc8-1   | log2FC_db_wp ( WP and DB v DW ) |
|-------------|---------|-------------|---------------------------------|
| MARCH2      | 362849  | 1.0184354   | -1.0184354                      |
| MARCH8      | 312656  | 0.5621597   | -0.5621597                      |
| MARCH9      | 679272  | 1.2818643   | -1.2818643                      |
| MARCH11     | 499558  | -0.93179196 | 0.93179196                      |
| SEP6        | 691335  | 1.0019512   | -1.0019512                      |
| AATK        | 690853  | 1.1776892   | -1.1776892                      |
| ABCB10      | 361439  | 0.7567853   | -0.7567853                      |
| ABCG1       | 85264   | 0.9672269   | -0.9672269                      |
| ABHD14A     | 300982  | 0.98221266  | -0.98221266                     |
| ABHD6       | 305795  | 0.49674532  | -0.49674532                     |
| ABHD8       | 306338  | 1.4025161   | -1.4025161                      |
| ABI1        | 79249   | -0.3251728  | 0.3251728                       |
| ABTB1       | 297432  | 1.1204531   | -1.1204531                      |
| ACAA1       | 24157   | 1.1053482   | -1.1053482                      |
| ACAN        | 58968   | -1.5901684  | 1.5901684                       |
| ACPP        | 56780   | -1.9549279  | 1.9549279                       |
| ACSL1       | 25288   | -0.25970042 | 0.25970042                      |
| ACSL4       | 113976  | -0.5156731  | 0.5156731                       |
| ACTN1       | 81634   | -1.6871865  | 1.6871865                       |
| ACTN2       | 291245  | 0.9964308   | -0.9964308                      |
| ACTR3B      | 362298  | 1.1455386   | -1.1455386                      |
| ACVR1       | 79558   | -0.89764786 | 0.89764786                      |
| ACVR1C      | 245921  | -2.020098   | 2.020098                        |
| ADAMTS1     | 79252   | -1.3923155  | 1.3923155                       |
| ADAMTS15    | 300474  | 1.4631126   | -1.4631126                      |
| ADAMTS2     | 287899  | 1.6056658   | -1.6056658                      |
| ADAMTS5     | 304135  | -2.0638483  | 2.0638483                       |
| ADAMTS7     | 315879  | 1.2275528   | -1.2275528                      |
| ADAP1       | 171097  | 1.135771    | -1.135771                       |
| ADCK3       | 360887  | 1.6959999   | -1.6959999                      |
| ADCY7       | 84420   | -1.5113342  | 1.5113342                       |
| ADCY8       | 29241   | -1.4688996  | 1.4688996                       |
| ADGRB3      | 301309  | 0.9077113   | -0.9077113                      |
| ADGRE5      | 361383  | -1.1002142  | 1.1002142                       |
| ADM         | 25026   | -0.8431437  | 0.8431437                       |
| ADORA1      | 29290   | -1.5732242  | 1.5732242                       |
| ADORA2A     | 25369   | 2.0874836   | -2.0874836                      |
| ADRA1A      | 29412   | -3.6117969  | 3.6117969                       |
| ADRA1B      | 24173   | -1.7472442  | 1.7472442                       |
| ADRA1D      | 29413   | -2.5322816  | 2.5322816                       |
| ADSS        | 289276  | 0.4811795   | -0.4811795                      |

|          |        |             |             |
|----------|--------|-------------|-------------|
| AEN      | 361594 | -0.62921613 | 0.62921613  |
| AFAP1L1  | 291565 | -0.63077354 | 0.63077354  |
| AFTPH    | 305544 | -0.60534877 | 0.60534877  |
| AGBL5    | 362710 | 0.69131386  | -0.69131386 |
| AGFG1    | 363266 | -0.32273915 | 0.32273915  |
| AGFG2    | 304375 | 0.84993124  | -0.84993124 |
| AGPAT4   | 170919 | 0.29892495  | -0.29892495 |
| AGTR1A   | 24180  | -2.2749994  | 2.2749994   |
| AHCYL2   | 312192 | -0.7150247  | 0.7150247   |
| AHI1     | 308923 | -0.50456995 | 0.50456995  |
| AIFM1    | 83533  | 0.48263925  | -0.48263925 |
| AIG1     | 292486 | 0.9889844   | -0.9889844  |
| AIPL1    | 59110  | -1.7069412  | 1.7069412   |
| AJAP1    | 687031 | -0.8164796  | 0.8164796   |
| AK1      | 24183  | 1.2302434   | -1.2302434  |
| AK4      | 29223  | -1.5553226  | 1.5553226   |
| AKAP7    | 361458 | 0.8108324   | -0.8108324  |
| AKT2     | 25233  | -0.7264136  | 0.7264136   |
| ALDH1B1  | 298079 | 1.5108378   | -1.5108378  |
| ALG9     | 367083 | 0.6862229   | -0.6862229  |
| ALKBH4   | 288587 | -0.537583   | 0.537583    |
| ALOXE3   | 287424 | -1.671209   | 1.671209    |
| AMN      | 314459 | 3.0723894   | -3.0723894  |
| AMOTL2   | 65157  | 0.9606952   | -0.9606952  |
| AMPD2    | 362015 | 0.99161434  | -0.99161434 |
| AMZ2     | 360650 | 0.91489744  | -0.91489744 |
| ANAPC2   | 296558 | 1.145698    | -1.145698   |
| ANAPC7   | 304490 | 0.78994304  | -0.78994304 |
| ANGPT2   | 89805  | -1.492057   | 1.492057    |
| ANK1     | 306570 | -0.7242867  | 0.7242867   |
| ANKEF1   | 296184 | -1.1365056  | 1.1365056   |
| ANKMY2   | 314046 | 0.89643574  | -0.89643574 |
| ANKRD12  | 316775 | 0.84804845  | -0.84804845 |
| ANKRD13D | 361699 | 1.2342212   | -1.2342212  |
| ANKRD33B | 310200 | -3.6498084  | 3.6498084   |
| ANKRD34A | 295283 | 1.2890335   | -1.2890335  |
| ANKRD34C | 300889 | -2.4182699  | 2.4182699   |
| ANKRD52  | 362811 | -1.0459763  | 1.0459763   |
| ANKRD6   | 500430 | 1.0373784   | -1.0373784  |
| ANKS1B   | 314721 | -0.758562   | 0.758562    |
| ANO1     | 309135 | -2.3566136  | 2.3566136   |
| ANO4     | 299714 | -1.6268474  | 1.6268474   |
| ANO6     | 315272 | -0.7700067  | 0.7700067   |

|          |        |             |             |
|----------|--------|-------------|-------------|
| ANXA11   | 290527 | -1.4498796  | 1.4498796   |
| ANXA7    | 155423 | -0.34464207 | 0.34464207  |
| AP1S3    | 367304 | -1.3531628  | 1.3531628   |
| AP3S2    | 683402 | 1.3042969   | -1.3042969  |
| APBA2    | 83610  | -0.557084   | 0.557084    |
| APBB1    | 29722  | 1.1575422   | -1.1575422  |
| APC2     | 299611 | 1.1566436   | -1.1566436  |
| APCS     | 29339  | -2.2406497  | 2.2406497   |
| APOLD1   | 444983 | -1.2710346  | 1.2710346   |
| AQP11    | 286758 | 0.8479076   | -0.8479076  |
| ARC      | 54323  | -3.9109151  | 3.9109151   |
| AREG     | 29183  | -3.612455   | 3.612455    |
| ARFGAP3  | 503165 | 0.5375412   | -0.5375412  |
| ARFIP1   | 60382  | -1.0706038  | 1.0706038   |
| ARHGAP10 | 688429 | -0.851316   | 0.851316    |
| ARHGAP17 | 63994  | -0.656478   | 0.656478    |
| ARHGAP20 | 367085 | 0.9537013   | -0.9537013  |
| ARHGAP25 | 500246 | -1.0276208  | 1.0276208   |
| ARHGEF25 | 314904 | 1.3536028   | -1.3536028  |
| ARHGEF28 | 361882 | 1.0131143   | -1.0131143  |
| ARHGEF3  | 290541 | -1.7099833  | 1.7099833   |
| ARID5A   | 316327 | -1.8440592  | 1.8440592   |
| ARIH1    | 300756 | -0.68741125 | 0.68741125  |
| ARL14EP  | 311279 | -0.94357884 | 0.94357884  |
| ARMC7    | 287827 | 0.30938548  | -0.30938548 |
| ARMCX6   | 363496 | 1.8307469   | -1.8307469  |
| ARPP21   | 363153 | -0.39693156 | 0.39693156  |
| ARRDC4   | 293019 | 0.89794666  | -0.89794666 |
| ARSJ     | 311013 | -2.640662   | 2.640662    |
| ASAP1    | 314961 | -1.2466823  | 1.2466823   |
| ASCC1    | 294512 | 1.1025828   | -1.1025828  |
| ASCC2    | 498402 | -0.7461903  | 0.7461903   |
| ASCC3    | 309887 | -0.6759984  | 0.6759984   |
| ASGR1    | 24210  | -2.110998   | 2.110998    |
| ASUN     | 690728 | -0.6417649  | 0.6417649   |
| ATF1     | 315305 | -0.5402889  | 0.5402889   |
| ATG10    | 688555 | 1.2703956   | -1.2703956  |
| ATG16L1  | 363278 | -0.6789589  | 0.6789589   |
| ATMIN    | 315037 | -0.43551126 | 0.43551126  |
| ATP11A   | 306600 | -1.0544498  | 1.0544498   |
| ATP13A3  | 678704 | -1.1816852  | 1.1816852   |
| ATP1B1   | 25650  | -0.36451632 | 0.36451632  |
| ATP2B1   | 29598  | -0.34199724 | 0.34199724  |

|          |        |             |             |
|----------|--------|-------------|-------------|
| ATP5SL   | 361520 | 0.81120443  | -0.81120443 |
| ATP6V0A2 | 116455 | -1.0298127  | 1.0298127   |
| ATPAF2   | 303190 | 1.1358901   | -1.1358901  |
| ATRAID   | 298841 | 1.178951    | -1.178951   |
| AUH      | 361215 | 1.0459806   | -1.0459806  |
| B3GNT2   | 305571 | 0.6440816   | -0.6440816  |
| B3GNT7   | 316583 | 1.7183048   | -1.7183048  |
| B4GALT7  | 364675 | 1.2259122   | -1.2259122  |
| BAALC    | 140720 | -0.8724806  | 0.8724806   |
| BACH1    | 304127 | -1.7171786  | 1.7171786   |
| BAD      | 64639  | 1.2983373   | -1.2983373  |
| BAG3     | 293524 | -2.8785598  | 2.8785598   |
| BAI1     | 362931 | -0.7593267  | 0.7593267   |
| BAIAP2   | 117542 | -1.7085128  | 1.7085128   |
| BANP     | 292064 | 0.29416624  | -0.29416624 |
| BAZ1A    | 314126 | -1.0645523  | 1.0645523   |
| BBC3     | 317673 | 1.5297897   | -1.5297897  |
| BBS2     | 113948 | 0.7999286   | -0.7999286  |
| BBX      | 303970 | -2.2494485  | 2.2494485   |
| BCAS3    | 363662 | 1.1168277   | -1.1168277  |
| BCKDHA   | 25244  | 0.8446007   | -0.8446007  |
| BCL11A   | 305589 | 0.9717859   | -0.9717859  |
| BCOR     | 317346 | -0.53614026 | 0.53614026  |
| BCORL1   | 302810 | 0.8902297   | -0.8902297  |
| BDNF     | 24225  | -1.5365307  | 1.5365307   |
| BEND5    | 362564 | 1.4132191   | -1.4132191  |
| BEND7    | 361275 | -1.3499432  | 1.3499432   |
| BHLHE22  | 365748 | 2.9591675   | -2.9591675  |
| BHLHE23  | 499952 | -1.4622635  | 1.4622635   |
| BHLHE40  | 79431  | -2.205643   | 2.205643    |
| BID      | 64625  | 0.8444431   | -0.8444431  |
| BLES03   | 266609 | 1.273569    | -1.273569   |
| BLOC1S5  | 306868 | 0.92540556  | -0.92540556 |
| BLOC1S6  | 317630 | 0.49731073  | -0.49731073 |
| BMPER    | 300455 | -1.1944522  | 1.1944522   |
| BNIP3    | 84480  | 1.0849622   | -1.0849622  |
| BNIP3L   | 140923 | 1.0528262   | -1.0528262  |
| BOK      | 29884  | 1.6824747   | -1.6824747  |
| BPHL     | 361239 | 1.2076544   | -1.2076544  |
| BRE      | 362704 | 1.037709    | -1.037709   |
| BRINP3   | 286901 | 1.3785894   | -1.3785894  |
| BROX     | 305031 | 0.6399443   | -0.6399443  |
| BSDC1    | 297890 | 0.70258904  | -0.70258904 |

|          |           |             |             |
|----------|-----------|-------------|-------------|
| BTBD6    | 690367    | 0.77760196  | -0.77760196 |
| BTG4     | 315650    | 1.8256004   | -1.8256004  |
| BTRC     | 361765    | -0.5605399  | 0.5605399   |
| BVES     | 365603    | -1.4005638  | 1.4005638   |
| C1QL2    | 288979    | -3.3434925  | 3.3434925   |
| C1QL3    | 680404    | -1.6164814  | 1.6164814   |
| C1S      | 192262    | -1.7718594  | 1.7718594   |
| C2CD2L   | 300666    | 0.6377958   | -0.6377958  |
| CABLES1  | 307585    | 0.7776117   | -0.7776117  |
| CACNB1   | 50688     | -0.37143254 | 0.37143254  |
| CACNB3   | 25297     | 1.0428525   | -1.0428525  |
| CACNB4   | 58942     | -1.2364125  | 1.2364125   |
| CACNG3   | 140724    | -1.3195261  | 1.3195261   |
| CALCA    | 24241     | -2.2412775  | 2.2412775   |
| CALCOCO1 | 246047    | 0.6982477   | -0.6982477  |
| CALCRL   | 25029     | -1.2262877  | 1.2262877   |
| CALHM2   | 294019    | 0.9394895   | -0.9394895  |
| CALY     | 192349    | 1.3429091   | -1.3429091  |
| CAMK1G   | 171358    | -0.5225028  | 0.5225028   |
| CAMKK1   | 60341     | -0.6206306  | 0.6206306   |
| CAPN2    | 29154     | -0.51820725 | 0.51820725  |
| CAPN5    | 171495    | 1.1776319   | -1.1776319  |
| CARF     | 301446    | 0.7784706   | -0.7784706  |
| CARS     | 293638    | -0.6864734  | 0.6864734   |
| CAT      | 24248     | 0.48430485  | -0.48430485 |
| CAV1     | 25404     | -1.3746773  | 1.3746773   |
| CBFA2T3  | 361431    | -1.1455648  | 1.1455648   |
| CBFB     | 361391    | -0.62609076 | 0.62609076  |
| CBLN1    | 498922    | 1.3264753   | -1.3264753  |
| CBLN2    | 291388    | -0.9794108  | 0.9794108   |
| CBX8     | 303731    | 0.7328807   | -0.7328807  |
| CCBL2    | 541589    | 1.2280177   | -1.2280177  |
| CCDC129  | 500139    | -1.8191351  | 1.8191351   |
| CCDC148  | 311051    | 1.48715     | -1.48715    |
| CCDC175  | 500668    | 1.6173832   | -1.6173832  |
| CCDC184  | 500925    | 1.306872    | -1.306872   |
| CCDC28A  | 361454    | 2.0075464   | -2.0075464  |
| CCDC28B  | 682445    | 1.71312     | -1.71312    |
| CCDC32   | 296081    | 0.83603305  | -0.83603305 |
| CCDC40   | 287867    | 1.0490103   | -1.0490103  |
| CCDC53   | 299707    | 1.4643389   | -1.4643389  |
| CCDC86   | 293738    | -1.2498329  | 1.2498329   |
| CCDC92   | 100036765 | -0.5050791  | 0.5050791   |



|            |        |             |             |
|------------|--------|-------------|-------------|
| CCDC93     | 304743 | -0.6232316  | 0.6232316   |
| CCKAR      | 24889  | 2.4626114   | -2.4626114  |
| CCKBR      | 25706  | -2.2215497  | 2.2215497   |
| CCND1      | 58919  | -1.5370443  | 1.5370443   |
| CCNG2      | 29157  | 1.8686941   | -1.8686941  |
| CCNL2      | 298686 | -0.5288063  | 0.5288063   |
| CCPG1      | 363098 | 1.1234567   | -1.1234567  |
| CD200      | 24560  | 1.1759683   | -1.1759683  |
| CD226      | 307199 | 1.8789576   | -1.8789576  |
| CD55       | 64036  | 0.7351284   | -0.7351284  |
| CD59       | 25407  | 1.0753154   | -1.0753154  |
| CDC14A     | 310806 | -1.7185223  | 1.7185223   |
| CDC25B     | 171103 | 0.9233059   | -0.9233059  |
| CDC37L1    | 293886 | -0.5121295  | 0.5121295   |
| CDC42EP3   | 313838 | 0.95548755  | -0.95548755 |
| CDC42EP4   | 303653 | 1.3727965   | -1.3727965  |
| CDCA4      | 500727 | -0.63640547 | 0.63640547  |
| CDCA7L     | 619566 | -0.6370459  | 0.6370459   |
| CDH15      | 361432 | 1.6700618   | -1.6700618  |
| CDH7       | 29162  | 1.4516338   | -1.4516338  |
| CDK19      | 309804 | 0.8173471   | -0.8173471  |
| CDK5       | 140908 | 1.1217455   | -1.1217455  |
| CDK5RAP1   | 252827 | 1.0830865   | -1.0830865  |
| CDK5RAP3   | 80278  | 1.1755166   | -1.1755166  |
| CDK8       | 498140 | -0.36754665 | 0.36754665  |
| CDKN2AIPNL | 287278 | 0.944174    | -0.944174   |
| CDO1       | 81718  | 1.284292    | -1.284292   |
| CDYL       | 361237 | -1.3846971  | 1.3846971   |
| CDYL2      | 292044 | -1.3537384  | 1.3537384   |
| CELF6      | 300758 | 0.9918951   | -0.9918951  |
| CEP57L1    | 294519 | 0.5916561   | -0.5916561  |
| CFB        | 294257 | -1.421618   | 1.421618    |
| CFLAR      | 117279 | -1.0501424  | 1.0501424   |
| CH25H      | 309527 | -1.1801852  | 1.1801852   |
| CHD1       | 308215 | -1.0756745  | 1.0756745   |
| CHD6       | 311607 | 0.6874034   | -0.6874034  |
| CHML       | 689102 | -2.2738986  | 2.2738986   |
| CHMP1A     | 365024 | 0.81924915  | -0.81924915 |
| CHMP6      | 287873 | 1.1243142   | -1.1243142  |
| CHN2       | 84031  | 1.0361619   | -1.0361619  |
| CHODL      | 288289 | 2.231705    | -2.231705   |
| CHRAC1     | 315058 | 0.6425566   | -0.6425566  |
| CHRM2      | 81645  | -1.6941352  | 1.6941352   |

|         |        |             |             |
|---------|--------|-------------|-------------|
| CHRNA5  | 25102  | 1.1824613   | -1.1824613  |
| CHST10  | 140568 | -0.43606564 | 0.43606564  |
| CHST12  | 304322 | 1.2780493   | -1.2780493  |
| CHST7   | 302302 | -0.5012247  | 0.5012247   |
| CHSY1   | 292999 | -0.34165925 | 0.34165925  |
| CHURC1  | 299154 | 1.9833574   | -1.9833574  |
| CIR1    | 362149 | 1.5603967   | -1.5603967  |
| CISD3   | 287661 | 1.9258878   | -1.9258878  |
| CISH    | 83681  | 1.444542    | -1.444542   |
| CITED2  | 114490 | -1.593563   | 1.593563    |
| CLASP2  | 114514 | 0.70147526  | -0.70147526 |
| CLDN9   | 287099 | 1.4729203   | -1.4729203  |
| CLDND1  | 288182 | -0.4175044  | 0.4175044   |
| CLIP2   | 29264  | 1.1156156   | -1.1156156  |
| CLMP    | 286939 | 1.8699203   | -1.8699203  |
| CLN5    | 306128 | -0.8822822  | 0.8822822   |
| CLN8    | 306619 | 0.57413274  | -0.57413274 |
| CMAS    | 312826 | 1.2177485   | -1.2177485  |
| CMPK2   | 314004 | 0.8633549   | -0.8633549  |
| CMTR2   | 292016 | -1.0163047  | 1.0163047   |
| CNGA4   | 85258  | -3.4251666  | 3.4251666   |
| CNNM1   | 309387 | -0.75169325 | 0.75169325  |
| CNNM2   | 294014 | 0.48656547  | -0.48656547 |
| CNP     | 25275  | 0.96667814  | -0.96667814 |
| CNR1    | 25248  | 0.5381837   | -0.5381837  |
| CNTFR   | 313173 | -0.86567485 | 0.86567485  |
| CNTN2   | 25356  | 1.4346097   | -1.4346097  |
| CNTN3   | 54279  | 1.2686888   | -1.2686888  |
| COASY   | 287711 | 0.91764677  | -0.91764677 |
| COBL    | 305497 | 0.6472813   | -0.6472813  |
| COG3    | 361073 | -0.77866966 | 0.77866966  |
| COL26A1 | 685612 | 1.0989481   | -1.0989481  |
| COL4A1  | 290905 | -0.5921858  | 0.5921858   |
| COL5A1  | 85490  | -1.4546968  | 1.4546968   |
| COMMD1  | 289831 | 1.6570169   | -1.6570169  |
| COMTD1  | 305685 | 1.2443414   | -1.2443414  |
| COX11   | 690300 | -0.71707284 | 0.71707284  |
| COX19   | 304330 | 1.2216917   | -1.2216917  |
| CPNE4   | 367160 | 1.0142878   | -1.0142878  |
| CPNE8   | 362988 | 1.2241803   | -1.2241803  |
| CRAT    | 311849 | 0.6730089   | -0.6730089  |
| CREBL2  | 362453 | 0.47197583  | -0.47197583 |
| CREM    | 25620  | -1.4372749  | 1.4372749   |

|          |               |             |             |
|----------|---------------|-------------|-------------|
| CRHBP    | 29625         | -3.949865   | 3.949865    |
| CRIP2    | 338401        | 1.1930181   | -1.1930181  |
| CRIPT    | 56725         | 1.1421247   | -1.1421247  |
| CRLF3    | 54395         | -0.7444929  | 0.7444929   |
| CROT     | 83842         | -0.85425067 | 0.85425067  |
| CRY1     | 299691        | -0.6343994  | 0.6343994   |
| CRYM     | 117024        | 1.5057176   | -1.5057176  |
| CSPG5    | 50568         | 0.853645    | -0.853645   |
| CSRNP1   | 363165        | -1.3948185  | 1.3948185   |
| CSRP2    | 29317         | 1.7276167   | -1.7276167  |
| CTDP1    | 291414        | -0.30255198 | 0.30255198  |
| CTPS2    | 619580        | 0.95587426  | -0.95587426 |
| CTSF     | 361704        | 1.2331759   | -1.2331759  |
| CUBN     | 80848         | -2.3821952  | 2.3821952   |
| CUL9     | 316228        | 1.498927    | -1.498927   |
| CUX2     | 288665        | 0.9874247   | -0.9874247  |
| CX3CL1   | 89808         | -0.6751452  | 0.6751452   |
| CXCR4    | 60628         | 0.8277072   | -0.8277072  |
| CXXC5    | 291670        | -0.8889998  | 0.8889998   |
| CYB561   | 303601        | 1.338949    | -1.338949   |
| CYB561D2 | 363137        | 1.6831125   | -1.6831125  |
| CYB5R1   | 304805        | 1.3150365   | -1.3150365  |
| CYGB     | 170520        | 1.8016915   | -1.8016915  |
| CYHR1    | 100362155.chr | 1.5363264   | -1.5363264  |
| CYLD     | 312937        | 0.6384103   | -0.6384103  |
| CYP11B2  | 24294         | -1.7526295  | 1.7526295   |
| CYP11B3  | 353498        | -2.2118537  | 2.2118537   |
| CYP26B1  | 312495        | -3.2631261  | 3.2631261   |
| CYP27B1  | 114700        | -2.6242201  | 2.6242201   |
| CYR61    | 83476         | 2.1667793   | -2.1667793  |
| CYS1     | 690489        | 1.237013    | -1.237013   |
| CYTH1    | 116691        | 0.5620195   | -0.5620195  |
| D2HGDH   | 301624        | 1.048223    | -1.048223   |
| DAAM1    | 314212        | 1.1973464   | -1.1973464  |
| DARS2    | 304919        | 0.78181463  | -0.78181463 |
| DBNDD1   | 361437        | 2.8623035   | -2.8623035  |
| DBP      | 24309         | 1.0060977   | -1.0060977  |
| DCAF10   | 313242        | -0.7000545  | 0.7000545   |
| DCAF4    | 362762        | 1.1153011   | -1.1153011  |
| DCAKD    | 360639        | 0.59539396  | -0.59539396 |
| DCLK1    | 83825         | -0.5291546  | 0.5291546   |
| DCLK3    | 316023        | 3.1585078   | -3.1585078  |
| DCPS     | 266605        | 0.740661    | -0.740661   |

|         |        |             |             |
|---------|--------|-------------|-------------|
| DDAH2   | 294239 | 1.7449005   | -1.7449005  |
| DDHD1   | 305816 | -0.571644   | 0.571644    |
| DDIT4   | 140942 | 0.8063096   | -0.8063096  |
| DDX19B  | 690693 | -0.27219203 | 0.27219203  |
| DDX20   | 84473  | -0.47132653 | 0.47132653  |
| DDX21   | 317399 | -1.0781173  | 1.0781173   |
| DDX3X   | 317335 | -0.42627296 | 0.42627296  |
| DEAF1   | 83632  | 0.9790304   | -0.9790304  |
| DEF6    | 309642 | 1.9787971   | -1.9787971  |
| DEPDC5  | 305464 | 0.60728824  | -0.60728824 |
| DES     | 64362  | -1.3894205  | 1.3894205   |
| DESI1   | 315160 | -0.3931853  | 0.3931853   |
| DGCR8   | 287954 | -0.29063565 | 0.29063565  |
| DGUOK   | 297389 | 0.75320053  | -0.75320053 |
| DHRS9   | 170635 | -4.409934   | 4.409934    |
| DHX40   | 287595 | 0.8696716   | -0.8696716  |
| DHX57   | 366532 | 0.9110711   | -0.9110711  |
| DIAPH1  | 307483 | -0.6938537  | 0.6938537   |
| DIEXF   | 305076 | -0.45094988 | 0.45094988  |
| DIP2C   | 307067 | -1.248641   | 1.248641    |
| DIRAS1  | 366826 | 1.1724926   | -1.1724926  |
| DIRC2   | 303902 | 0.7612408   | -0.7612408  |
| DIS3    | 306103 | -0.55803543 | 0.55803543  |
| DISC1   | 307940 | -1.470493   | 1.470493    |
| DISP2   | 311324 | 0.9088202   | -0.9088202  |
| DKK2    | 295445 | -4.432964   | 4.432964    |
| DLC1    | 58834  | -2.8727405  | 2.8727405   |
| DLEU7   | 290308 | 1.9654785   | -1.9654785  |
| DLG1    | 25252  | -1.559255   | 1.559255    |
| DLGAP2  | 116681 | -3.2651875  | 3.2651875   |
| DLK1    | 114587 | -1.0597112  | 1.0597112   |
| DMP1    | 25312  | -3.0781653  | 3.0781653   |
| DNAJB4  | 295549 | 0.95473754  | -0.95473754 |
| DNAJB5  | 313811 | -0.76502573 | 0.76502573  |
| DNAJC25 | 362526 | -0.40392032 | 0.40392032  |
| DNASE2B | 59296  | -3.7200184  | 3.7200184   |
| DOC2A   | 65031  | 1.2574142   | -1.2574142  |
| DOCK8   | 499337 | -1.8718106  | 1.8718106   |
| DOK4    | 361364 | 1.2097769   | -1.2097769  |
| DOK5    | 502694 | -1.1789211  | 1.1789211   |
| DOT1L   | 362831 | -1.4931031  | 1.4931031   |
| DPF1    | 50545  | 1.4777873   | -1.4777873  |
| DPF3    | 299186 | -1.2533493  | 1.2533493   |

|         |        |             |             |
|---------|--------|-------------|-------------|
| DPM2    | 29640  | 1.2595621   | -1.2595621  |
| DPY19L1 | 315496 | -0.47533405 | 0.47533405  |
| DPYD    | 81656  | 0.5710019   | -0.5710019  |
| DPYSL2  | 25416  | 1.0006807   | -1.0006807  |
| DRD5    | 25195  | -5.998091   | 5.998091    |
| DSE     | 365583 | -0.54123944 | 0.54123944  |
| DSG3    | 291752 | -3.3121614  | 3.3121614   |
| DTX3    | 500847 | 0.92782456  | -0.92782456 |
| DUOX1   | 266807 | -1.1840279  | 1.1840279   |
| DUSP14  | 360580 | -1.9785913  | 1.9785913   |
| DUSP23  | 360881 | 1.6762038   | -1.6762038  |
| DUSP26  | 306527 | 1.5668025   | -1.5668025  |
| DUSP4   | 60587  | -2.832405   | 2.832405    |
| DUSP5   | 171109 | -2.4208353  | 2.4208353   |
| DUSP6   | 116663 | -1.7100483  | 1.7100483   |
| DYNC111 | 29564  | 0.8546949   | -0.8546949  |
| EBF1    | 116543 | 1.8131684   | -1.8131684  |
| EBF3    | 361668 | -1.4570917  | 1.4570917   |
| EBPL    | 361054 | 1.8555979   | -1.8555979  |
| ECEL1   | 60417  | -2.5625746  | 2.5625746   |
| ECH1    | 64526  | 0.8102297   | -0.8102297  |
| EDNRA   | 24326  | -1.5468034  | 1.5468034   |
| EEA1    | 314764 | -1.3007274  | 1.3007274   |
| EEF2K   | 25435  | 0.9492289   | -0.9492289  |
| EFNA4   | 310643 | 1.9769019   | -1.9769019  |
| EFNB3   | 360546 | 1.1232499   | -1.1232499  |
| EFR3A   | 362923 | -1.2757814  | 1.2757814   |
| EGR2    | 114090 | -1.3127321  | 1.3127321   |
| EGR3    | 25148  | -2.6038425  | 2.6038425   |
| EHBP1   | 305556 | 0.5023931   | -0.5023931  |
| EHBP1L1 | 309169 | 2.03378     | -2.03378    |
| EHD1    | 293692 | 1.2024988   | -1.2024988  |
| EHD4    | 192204 | -1.3532994  | 1.3532994   |
| EHF     | 295965 | -2.370194   | 2.370194    |
| EIF1B   | 301068 | 1.0278952   | -1.0278952  |
| EIF2B5  | 192234 | 0.2963045   | -0.2963045  |
| EIF5A   | 287444 | 0.4837144   | -0.4837144  |
| ELAVL4  | 432358 | 1.4632306   | -1.4632306  |
| ELF3    | 304815 | 2.784469    | -2.784469   |
| ELMOD1  | 315670 | 1.4567773   | -1.4567773  |
| ELOVL7  | 361895 | -2.4834602  | 2.4834602   |
| ELP2    | 307545 | 0.6777394   | -0.6777394  |
| EMC9    | 290224 | 2.015691    | -2.015691   |

|          |           |             |             |
|----------|-----------|-------------|-------------|
| EMILIN3  | 362262    | -1.2687697  | 1.2687697   |
| EML1     | 362783    | 0.8281443   | -0.8281443  |
| EML4     | 313861    | -0.95312595 | 0.95312595  |
| EML5     | 444982    | -1.1021036  | 1.1021036   |
| EMP1     | 25314     | -4.5941815  | 4.5941815   |
| EMP3     | 81505     | -1.6464361  | 1.6464361   |
| ENTPD6   | 85260     | 0.9032556   | -0.9032556  |
| EPB41L4B | 500464    | -0.9424875  | 0.9424875   |
| EPDR1    | 291180    | -0.7201802  | 0.7201802   |
| EPHA3    | 29210     | 1.0821818   | -1.0821818  |
| EPHA4    | 316539    | 0.9911312   | -0.9911312  |
| EPHB6    | 312275    | 1.5996736   | -1.5996736  |
| ERAL1    | 363646    | 0.8207574   | -0.8207574  |
| ERCC1    | 292673    | -0.49968156 | 0.49968156  |
| ERRFI1   | 313729    | -1.0401924  | 1.0401924   |
| ESR1     | 24890     | -1.1356808  | 1.1356808   |
| ETHE1    | 292710    | 1.3022593   | -1.3022593  |
| ETV4     | 360635    | -0.70073    | 0.70073     |
| ETV5     | 303828    | -2.085397   | 2.085397    |
| EVA1A    | 500221    | -0.9362583  | 0.9362583   |
| EXO1     | 305000    | -0.83079153 | 0.83079153  |
| EXOC3L1  | 291961    | 1.5982518   | -1.5982518  |
| EXOC5    | 60627     | -0.7554035  | 0.7554035   |
| EXTL2    | 310803    | 0.46723768  | -0.46723768 |
| EZR      | 54319     | -1.5817354  | 1.5817354   |
| F2R      | 25439     | -0.67870164 | 0.67870164  |
| FADS3    | 286922    | 0.8076848   | -0.8076848  |
| FAIM2    | 246274    | 1.2188671   | -1.2188671  |
| FAM102B  | 365903    | -0.8933741  | 0.8933741   |
| FAM107B  | 498796    | -0.6215519  | 0.6215519   |
| FAM110C  | 500638    | -4.870246   | 4.870246    |
| FAM110D  | 500563    | 2.551216    | -2.551216   |
| FAM118A  | 300120    | 1.0343237   | -1.0343237  |
| FAM127B  | 679038    | 0.98202944  | -0.98202944 |
| FAM129B  | 362115    | -0.3663069  | 0.3663069   |
| FAM129C  | 498604    | 1.7675214   | -1.7675214  |
| FAM134A  | 363252    | 0.820052    | -0.820052   |
| FAM136A  | 297415    | 1.1968178   | -1.1968178  |
| FAM150B  | 679566    | -4.36002    | 4.36002     |
| FAM163B  | 685169    | -0.50279844 | 0.50279844  |
| FAM184B  | 289671    | 2.1667516   | -2.1667516  |
| FAM192A  | 307652    | 0.84725934  | -0.84725934 |
| FAM196A  | 100233213 | -1.6162378  | 1.6162378   |

|         |        |             |             |
|---------|--------|-------------|-------------|
| FAM212B | 310764 | -2.0356653  | 2.0356653   |
| FAM214A | 300836 | 1.1667423   | -1.1667423  |
| FAM220A | 498145 | 0.8113638   | -0.8113638  |
| FAM222B | 497960 | -0.9767736  | 0.9767736   |
| FAM26F  | 294430 | -2.4521663  | 2.4521663   |
| FAM43A  | 288031 | -1.4174006  | 1.4174006   |
| FAM65B  | 306934 | -0.95911074 | 0.95911074  |
| FAM84A  | 313969 | -1.5026602  | 1.5026602   |
| FAR1    | 293173 | -1.3329574  | 1.3329574   |
| FARS2   | 306879 | 1.2801592   | -1.2801592  |
| FBN2    | 689008 | -0.93448967 | 0.93448967  |
| FBXL14  | 312675 | -0.8897135  | 0.8897135   |
| FBXL20  | 64039  | 0.5463844   | -0.5463844  |
| FBXL6   | 362941 | 1.4751589   | -1.4751589  |
| FBXO16  | 305970 | 1.7636634   | -1.7636634  |
| FBXO31  | 498959 | 1.4363247   | -1.4363247  |
| FBXO41  | 312504 | 1.2192515   | -1.2192515  |
| FBXO44  | 500587 | 1.0990988   | -1.0990988  |
| FBXW17  | 361219 | 1.3822906   | -1.3822906  |
| FCHO1   | 290639 | 1.3593366   | -1.3593366  |
| FDFT1   | 29580  | 1.176812    | -1.176812   |
| FDXR    | 79122  | 1.5488063   | -1.5488063  |
| FEZ1    | 81730  | 1.0974953   | -1.0974953  |
| FFAR4   | 294075 | -2.5157187  | 2.5157187   |
| FGF13   | 84488  | 1.0222241   | -1.0222241  |
| FGF2    | 54250  | -4.242713   | 4.242713    |
| FGF3    | 170633 | -2.5571735  | 2.5571735   |
| FGF8    | 29349  | -2.0306342  | 2.0306342   |
| FGF9    | 25444  | -1.3539819  | 1.3539819   |
| FGFR1   | 79114  | -2.3136618  | 2.3136618   |
| FHL2    | 63839  | -0.5822633  | 0.5822633   |
| FIBP    | 282837 | 1.2658006   | -1.2658006  |
| FIG4    | 309855 | 0.70847756  | -0.70847756 |
| FILIP1  | 246776 | 2.7372005   | -2.7372005  |
| FJX1    | 366140 | -0.46838948 | 0.46838948  |
| FKBP5   | 361810 | -0.6876135  | 0.6876135   |
| FLOT1   | 64665  | 1.4665278   | -1.4665278  |
| FLOT2   | 83764  | 1.4728571   | -1.4728571  |
| FLRT1   | 499308 | -1.623491   | 1.623491    |
| FLT1    | 54251  | -2.632133   | 2.632133    |
| FMNL1   | 287746 | -0.7881743  | 0.7881743   |
| FN3KRP  | 303755 | 0.49876475  | -0.49876475 |
| FNDC3A  | 306022 | -1.3759376  | 1.3759376   |

|           |        |             |             |
|-----------|--------|-------------|-------------|
| FNDC3B    | 294925 | -1.8846078  | 1.8846078   |
| FOXP2     | 500037 | 1.0561723   | -1.0561723  |
| FRA10AC1  | 365458 | 1.5293473   | -1.5293473  |
| FRAS1     | 289486 | -1.3616799  | 1.3616799   |
| FRMD3     | 298141 | 0.5577625   | -0.5577625  |
| FRMD6     | 257646 | -1.4485581  | 1.4485581   |
| FRS3      | 316213 | 1.4993623   | -1.4993623  |
| FST       | 24373  | 3.1059115   | -3.1059115  |
| FSTL5     | 365823 | 0.41745064  | -0.41745064 |
| FTSJ3     | 303608 | -0.36455974 | 0.36455974  |
| FUCA2     | 292485 | 1.1626443   | -1.1626443  |
| FUNDC1    | 363442 | 0.85060465  | -0.85060465 |
| FURIN     | 54281  | -0.75249976 | 0.75249976  |
| FUT7      | 296564 | -1.479171   | 1.479171    |
| FXD6      | 63847  | 1.0193477   | -1.0193477  |
| FYTTD1    | 360726 | -0.31878003 | 0.31878003  |
| FZD1      | 58868  | 0.79249483  | -0.79249483 |
| FZD4      | 64558  | -1.4714973  | 1.4714973   |
| FZR1      | 314642 | 1.0390644   | -1.0390644  |
| GABARAPL1 | 689161 | 0.7775922   | -0.7775922  |
| GABRD     | 29689  | 1.7964844   | -1.7964844  |
| GABRG2    | 29709  | 1.161652    | -1.161652   |
| GABRQ     | 65187  | -0.915536   | 0.915536    |
| GADD45B   | 299626 | -1.4834048  | 1.4834048   |
| GAL       | 29141  | -2.946706   | 2.946706    |
| GALE      | 114860 | 1.5647572   | -1.5647572  |
| GALK2     | 296117 | 1.3194399   | -1.3194399  |
| GALNT3    | 366061 | 0.69954914  | -0.69954914 |
| GALNT7    | 29750  | -1.491607   | 1.491607    |
| GALNT9    | 304571 | -1.1128696  | 1.1128696   |
| GALR1     | 50577  | -6.854205   | 6.854205    |
| GAS7      | 85246  | 0.69908094  | -0.69908094 |
| GBX1      | 246149 | -1.8644722  | 1.8644722   |
| GCGR      | 24953  | -1.8537114  | 1.8537114   |
| GCK       | 24385  | 4.057229    | -4.057229   |
| GCLC      | 25283  | -1.5143988  | 1.5143988   |
| GCNT1     | 64043  | -3.3693295  | 3.3693295   |
| GDNF      | 25453  | -1.8685989  | 1.8685989   |
| GEM       | 297902 | -1.464599   | 1.464599    |
| GEMIN8    | 363462 | 1.0965458   | -1.0965458  |
| GFOD1     | 306842 | -1.8363347  | 1.8363347   |
| GFPT2     | 360518 | 1.2477304   | -1.2477304  |
| GFRA1     | 25454  | -2.5710554  | 2.5710554   |



|         |        |             |             |
|---------|--------|-------------|-------------|
| GINS2   | 292058 | -0.7468228  | 0.7468228   |
| GJB2    | 394266 | -1.0402259  | 1.0402259   |
| GLDN    | 315675 | -0.80972207 | 0.80972207  |
| GLI2    | 304729 | -1.8104296  | 1.8104296   |
| GLRA2   | 24397  | 0.9108136   | -0.9108136  |
| GLRB    | 25456  | 0.6576773   | -0.6576773  |
| GLRX    | 64045  | 0.938423    | -0.938423   |
| GMPPA   | 501167 | 1.1785016   | -1.1785016  |
| GOLGB1  | 192243 | 0.6012115   | -0.6012115  |
| GOLPH3L | 310669 | 0.26587063  | -0.26587063 |
| GPANK1  | 415064 | 1.29448     | -1.29448    |
| GPAT3   | 305166 | -1.7013336  | 1.7013336   |
| GPATCH2 | 289362 | -1.0378615  | 1.0378615   |
| GPC2    | 171517 | 1.5365086   | -1.5365086  |
| GPM6A   | 306439 | 0.86119384  | -0.86119384 |
| GPR101  | 317608 | -2.4965632  | 2.4965632   |
| GPR12   | 80840  | 2.111301    | -2.111301   |
| GPR139  | 293545 | 1.1281028   | -1.1281028  |
| GPR156  | 260430 | 0.9838025   | -0.9838025  |
| GPR158  | 291352 | -3.9495723  | 3.9495723   |
| GPR21   | 311911 | 0.32613963  | -0.32613963 |
| GPR26   | 192153 | -1.0960113  | 1.0960113   |
| GPR3    | 266769 | -1.151957   | 1.151957    |
| GPR37   | 117549 | 1.8543845   | -1.8543845  |
| GPR4    | 308408 | -0.7456858  | 0.7456858   |
| GPR45   | 301372 | 0.54334664  | -0.54334664 |
| GPR50   | 117097 | -2.2457151  | 2.2457151   |
| GPR52   | 684623 | 1.0648395   | -1.0648395  |
| GPR61   | 310780 | 1.0142778   | -1.0142778  |
| GPR63   | 297952 | -2.409319   | 2.409319    |
| GPR68   | 314386 | -2.2744858  | 2.2744858   |
| GPR83   | 140595 | -2.6879358  | 2.6879358   |
| GPR85   | 64020  | 0.8875574   | -0.8875574  |
| GPR88   | 64443  | -0.5728938  | 0.5728938   |
| GPRASP1 | 171407 | 0.37424657  | -0.37424657 |
| GPRC5A  | 312790 | -5.1008306  | 5.1008306   |
| GPRC5C  | 287805 | 1.4053327   | -1.4053327  |
| GPX3    | 64317  | 1.0541209   | -1.0541209  |
| GRASP   | 192254 | -2.925807   | 2.925807    |
| GREM1   | 50566  | -1.078983   | 1.078983    |
| GRHL2   | 299979 | -1.4455799  | 1.4455799   |
| GRIN2A  | 24409  | -3.1377962  | 3.1377962   |
| GRIP1   | 84016  | -0.62972784 | 0.62972784  |

|          |        |             |             |
|----------|--------|-------------|-------------|
| GRK5     | 59075  | -0.7295949  | 0.7295949   |
| GRM1     | 24414  | 1.7649225   | -1.7649225  |
| GRM6     | 24419  | 1.5778718   | -1.5778718  |
| GRN      | 29143  | 0.6929331   | -0.6929331  |
| GRP      | 171101 | 1.7887181   | -1.7887181  |
| GRWD1    | 308592 | -0.5673416  | 0.5673416   |
| GSPT2    | 501582 | -0.37514183 | 0.37514183  |
| GTF2IRD1 | 246770 | 0.80117756  | -0.80117756 |
| GTF3C5   | 362095 | 0.5371806   | -0.5371806  |
| GTPBP4   | 114300 | -1.0845741  | 1.0845741   |
| GUCY1A3  | 497757 | 1.2316636   | -1.2316636  |
| GUCY1B3  | 25202  | 1.2535505   | -1.2535505  |
| GYPC     | 364837 | -3.377353   | 3.377353    |
| GZF1     | 311508 | -0.41640782 | 0.41640782  |
| H2AFY2   | 361844 | 1.0627307   | -1.0627307  |
| HACE1    | 361866 | -1.2985991  | 1.2985991   |
| HAS1     | 282821 | -2.8278217  | 2.8278217   |
| HAUS8    | 290626 | -2.3493516  | 2.3493516   |
| HBEGF    | 25433  | -0.8350807  | 0.8350807   |
| HCN1     | 84390  | -0.9801577  | 0.9801577   |
| HCN3     | 114245 | 1.0103825   | -1.0103825  |
| HDAC11   | 297453 | 1.309217    | -1.309217   |
| HDX      | 317617 | -1.6189289  | 1.6189289   |
| HEATR5B  | 362683 | 0.72567636  | -0.72567636 |
| HECA     | 308624 | -0.65091056 | 0.65091056  |
| HECTD2   | 309514 | -2.1175406  | 2.1175406   |
| HEPHL1   | 500946 | -1.8817065  | 1.8817065   |
| HERC3    | 362377 | 0.5495569   | -0.5495569  |
| HERPUD2  | 300463 | 0.3756691   | -0.3756691  |
| HES6     | 316626 | 1.6718974   | -1.6718974  |
| HIC1     | 303310 | -1.6527004  | 1.6527004   |
| HIGD2A   | 290999 | 1.5173984   | -1.5173984  |
| HIST3H2A | 64646  | 1.7466613   | -1.7466613  |
| HMG20A   | 315689 | 0.5274166   | -0.5274166  |
| HMGA1    | 117062 | -2.1395297  | 2.1395297   |
| HMGA2    | 84017  | -2.8688316  | 2.8688316   |
| HMGCLL1  | 367112 | 1.3452446   | -1.3452446  |
| HOMER1   | 29546  | -1.7807477  | 1.7807477   |
| HOMER2   | 29547  | -0.7872916  | 0.7872916   |
| HP1BP3   | 313647 | 0.68039024  | -0.68039024 |
| HPCAL1   | 50871  | 1.0417874   | -1.0417874  |
| HPN      | 29135  | -1.9175618  | 1.9175618   |
| HRH1     | 24448  | -1.7427148  | 1.7427148   |

|         |           |             |             |
|---------|-----------|-------------|-------------|
| HRH3    | 85268     | 2.7061095   | -2.7061095  |
| HRK     | 117271    | 0.6865796   | -0.6865796  |
| HS3ST5  | 294449    | -0.7514898  | 0.7514898   |
| HSD11B1 | 25116     | -0.91425896 | 0.91425896  |
| HSDL1   | 361418    | 0.47044277  | -0.47044277 |
| HSF2BP  | 499413    | -3.7208776  | 3.7208776   |
| HSH2D   | 100360518 | -2.35337    | 2.35337     |
| HSPA12A | 307997    | 0.68739927  | -0.68739927 |
| HSPA1B  | 294254    | 1.3913642   | -1.3913642  |
| HSPA4L  | 294993    | -1.1560411  | 1.1560411   |
| HSPB11  | 685284    | 1.5743185   | -1.5743185  |
| HSPH1   | 288444    | -0.590423   | 0.590423    |
| HTR1B   | 25075     | -3.1142626  | 3.1142626   |
| HTR1F   | 60448     | -3.0416794  | 3.0416794   |
| HTR7    | 65032     | -0.6663122  | 0.6663122   |
| ICA1    | 81024     | 0.96159065  | -0.96159065 |
| ICK     | 84411     | 0.7886756   | -0.7886756  |
| IDH1    | 24479     | 0.74111575  | -0.74111575 |
| IER5    | 498256    | -1.1308113  | 1.1308113   |
| IER5L   | 499772    | -0.9994531  | 0.9994531   |
| IFFO2   | 641315    | -1.5317856  | 1.5317856   |
| IFNG    | 25712     | -2.047485   | 2.047485    |
| IFNGR2  | 360697    | 0.80174     | -0.80174    |
| IFRD1   | 29596     | -0.88495636 | 0.88495636  |
| IFT122  | 312651    | 0.8522669   | -0.8522669  |
| IFT52   | 362265    | 0.8561634   | -0.8561634  |
| IGF1    | 24482     | -1.4307919  | 1.4307919   |
| IGF2BP2 | 303824    | -1.0935881  | 1.0935881   |
| IGSF3   | 295325    | 1.2240644   | -1.2240644  |
| IGSF8   | 304979    | 1.394032    | -1.394032   |
| IGSF9   | 304982    | 2.1925702   | -2.1925702  |
| IL1RAP  | 25466     | -1.0855343  | 1.0855343   |
| IL1RL2  | 171106    | -2.4500093  | 2.4500093   |
| IL25    | 501996    | 1.6658764   | -1.6658764  |
| IL34    | 498951    | 2.079161    | -2.079161   |
| IL6R    | 24499     | -2.765288   | 2.765288    |
| IMPDH1  | 362329    | 1.1701523   | -1.1701523  |
| ING4    | 297597    | 1.3283275   | -1.3283275  |
| INHBA   | 29200     | -2.3986232  | 2.3986232   |
| INIP    | 298032    | -0.40450808 | 0.40450808  |
| INO80C  | 291737    | 0.64258486  | -0.64258486 |
| INPP5D  | 54259     | -1.4566199  | 1.4566199   |
| INSC    | 293166    | -3.3949947  | 3.3949947   |

|         |        |             |             |
|---------|--------|-------------|-------------|
| IPPK    | 306808 | -1.4250371  | 1.4250371   |
| IQSEC3  | 404781 | -0.8191139  | 0.8191139   |
| IRF6    | 364081 | -1.33301    | 1.33301     |
| IRGQ    | 292708 | 0.5293753   | -0.5293753  |
| IRS2    | 29376  | -1.7454215  | 1.7454215   |
| IRX6    | 307715 | -1.503687   | 1.503687    |
| ISG20L2 | 361977 | -0.82030123 | 0.82030123  |
| ISM1    | 311760 | -3.1640146  | 3.1640146   |
| ISOC1   | 364879 | 0.45082656  | -0.45082656 |
| ITGA11  | 315744 | 1.8450263   | -1.8450263  |
| ITGA6   | 114517 | -2.3379338  | 2.3379338   |
| ITM2C   | 301575 | 1.0857115   | -1.0857115  |
| ITPR3   | 25679  | -1.2132822  | 1.2132822   |
| ITSN1   | 29491  | -0.89033645 | 0.89033645  |
| IVD     | 24513  | 0.46442395  | -0.46442395 |
| IWS1    | 291705 | -0.4862273  | 0.4862273   |
| JADE3   | 299305 | -1.4989351  | 1.4989351   |
| JAK1    | 84598  | -0.6616703  | 0.6616703   |
| JAK2    | 24514  | -1.0800953  | 1.0800953   |
| JAKMIP1 | 305434 | 1.5035542   | -1.5035542  |
| JAKMIP3 | 365380 | 0.5178917   | -0.5178917  |
| JPH3    | 307916 | 0.8579227   | -0.8579227  |
| JPH4    | 445271 | 0.83087945  | -0.83087945 |
| JUNB    | 24517  | 1.1961887   | -1.1961887  |
| KATNBL1 | 691543 | -0.8469377  | 0.8469377   |
| KBTBD2  | 312372 | -0.7062145  | 0.7062145   |
| KCNA1   | 24520  | -2.9324117  | 2.9324117   |
| KCNA4   | 25469  | -1.1384053  | 1.1384053   |
| KCNB1   | 25736  | -0.9069853  | 0.9069853   |
| KCNC4   | 684516 | -1.2006938  | 1.2006938   |
| KCND2   | 65180  | 0.85068125  | -0.85068125 |
| KCNE2   | 171138 | 0.578719    | -0.578719   |
| KCNF1   | 298908 | -1.5706642  | 1.5706642   |
| KCNH3   | 27150  | 1.2644694   | -1.2644694  |
| KCNH4   | 114032 | 2.7187452   | -2.7187452  |
| KCNJ12  | 117052 | -0.89960426 | 0.89960426  |
| KCNJ4   | 116649 | -0.8559248  | 0.8559248   |
| KCNJ5   | 29713  | -1.992862   | 1.992862    |
| KCNK1   | 59324  | -0.40121496 | 0.40121496  |
| KCNK2   | 170899 | 2.3072448   | -2.3072448  |
| KCNK3   | 29553  | -1.1693228  | 1.1693228   |
| KCNMB2  | 294961 | -1.3542088  | 1.3542088   |
| KCNMB4  | 66016  | 1.8512713   | -1.8512713  |

|         |        |             |             |
|---------|--------|-------------|-------------|
| KCNN1   | 54261  | 1.5103672   | -1.5103672  |
| KCNN3   | 54263  | -1.9845036  | 1.9845036   |
| KCNV1   | 60326  | -1.0496781  | 1.0496781   |
| KCTD15  | 499129 | 0.79915696  | -0.79915696 |
| KCTD6   | 305792 | -0.46940184 | 0.46940184  |
| KDM1A   | 500569 | -0.24557911 | 0.24557911  |
| KDM4A   | 313539 | 0.65337425  | -0.65337425 |
| KDSR    | 360833 | 0.5790338   | -0.5790338  |
| KIF27   | 246209 | 0.9834024   | -0.9834024  |
| KIFAP3  | 289168 | 0.73230666  | -0.73230666 |
| KITLG   | 60427  | -1.4576013  | 1.4576013   |
| KL      | 83504  | -3.6032693  | 3.6032693   |
| KLC4    | 316226 | 1.3974475   | -1.3974475  |
| KLF10   | 81813  | -2.4324164  | 2.4324164   |
| KLF11   | 313994 | 2.2614818   | -2.2614818  |
| KLF13   | 499171 | 0.9078538   | -0.9078538  |
| KLF14   | 312203 | -2.951865   | 2.951865    |
| KLF2    | 306330 | -1.3621902  | 1.3621902   |
| KLF5    | 84410  | -0.84676117 | 0.84676117  |
| KLF7    | 363243 | 1.1907438   | -1.1907438  |
| KLF9    | 117560 | -1.7787198  | 1.7787198   |
| KLHDC8A | 305096 | 3.1098526   | -3.1098526  |
| KLHDC8B | 306589 | 1.5225165   | -1.5225165  |
| KLHL14  | 364823 | 0.937737    | -0.937737   |
| KLHL23  | 311114 | 0.75821215  | -0.75821215 |
| KLHL24  | 303803 | 0.91934127  | -0.91934127 |
| KLHL25  | 293023 | 0.5308118   | -0.5308118  |
| KLHL29  | 298867 | -0.89261734 | 0.89261734  |
| KLHL36  | 498957 | 1.0984741   | -1.0984741  |
| KLHL5   | 305351 | 0.54883945  | -0.54883945 |
| KLHL7   | 362303 | 0.7690857   | -0.7690857  |
| KMT2E   | 311968 | 0.7637932   | -0.7637932  |
| KRAS    | 24525  | -0.9396105  | 0.9396105   |
| LAMB3   | 305078 | -1.7006404  | 1.7006404   |
| LAMP5   | 362220 | -2.8400226  | 2.8400226   |
| LANCL2  | 362375 | 0.60344684  | -0.60344684 |
| LASP1   | 29278  | 0.83576113  | -0.83576113 |
| LBH     | 683626 | -1.3358486  | 1.3358486   |
| LCK     | 313050 | 1.7219892   | -1.7219892  |
| LDAH    | 313949 | 0.5557382   | -0.5557382  |
| LDB1    | 309447 | 0.9988345   | -0.9988345  |
| LDLRAD4 | 679578 | -0.878956   | 0.878956    |
| LEF1    | 161452 | -2.2935052  | 2.2935052   |

|              |           |             |             |
|--------------|-----------|-------------|-------------|
| LENG8        | 361506    | -1.1925628  | 1.1925628   |
| LEXM         | 500516    | -4.3647046  | 4.3647046   |
| LGI1         | 252892    | 1.1382487   | -1.1382487  |
| LHFPL2       | 294643    | -1.3977135  | 1.3977135   |
| LHX2         | 296706    | 1.1847873   | -1.1847873  |
| LHX4         | 360858    | -0.7624696  | 0.7624696   |
| LIMK2        | 29524     | 1.1858875   | -1.1858875  |
| LINGO3       | 690755    | -0.95841247 | 0.95841247  |
| LIPA         | 25055     | 0.5183348   | -0.5183348  |
| LIPG         | 291437    | -1.3595645  | 1.3595645   |
| LIX1         | 292381    | 1.0929558   | -1.0929558  |
| LMNA         | 60374     | -1.3383297  | 1.3383297   |
| LMO1         | 245979    | 1.6234221   | -1.6234221  |
| LMO2         | 362176    | -1.4608102  | 1.4608102   |
| LMO4         | 362051    | 1.6763406   | -1.6763406  |
| LOC100125362 | 100125362 | -0.4107643  | 0.4107643   |
| LOC100125367 | 100125367 | -0.791909   | 0.791909    |
| LOC100302465 | 100302465 | -2.2428775  | 2.2428775   |
| LOC100910945 | 100910945 | 1.6606487   | -1.6606487  |
| LOC314140    | 314140    | -0.47866273 | 0.47866273  |
| LOC500877    | 500877    | 1.3496305   | -1.3496305  |
| LOC680039    | 680039    | -0.6987722  | 0.6987722   |
| LOC680663    | 680663    | -1.9476616  | 1.9476616   |
| LOC682102    | 682102    | 1.5073361   | -1.5073361  |
| LOC688390    | 688390    | 1.0159336   | -1.0159336  |
| LOC688452    | 688452    | -1.316452   | 1.316452    |
| LOC688459    | 688459    | -3.1551375  | 3.1551375   |
| LOC688765    | 688765    | -0.62610525 | 0.62610525  |
| LPAR1        | 116744    | -3.2895625  | 3.2895625   |
| LPCAT2       | 100359680 | -0.8129258  | 0.8129258   |
| LPL          | 24539     | 0.85419005  | -0.85419005 |
| LRCH1        | 502020    | -0.8170938  | 0.8170938   |
| LRFN5        | 314164    | 1.121322    | -1.121322   |
| LRRC10B      | 309208    | -1.2030287  | 1.2030287   |
| LRRC16B      | 361041    | 1.1732049   | -1.1732049  |
| LRRC17       | 502715    | -0.84104425 | 0.84104425  |
| LRRC20       | 499430    | 1.2454054   | -1.2454054  |
| LRRC26       | 311803    | -2.5454128  | 2.5454128   |
| LRRC28       | 361588    | 0.92711407  | -0.92711407 |
| LRRC34       | 499589    | 1.666489    | -1.666489   |
| LRRC4        | 641521    | -0.7702187  | 0.7702187   |
| LRRC42       | 298309    | 0.95530796  | -0.95530796 |
| LRRC55       | 311171    | 0.8532531   | -0.8532531  |

|          |        |             |             |
|----------|--------|-------------|-------------|
| LRRC56   | 365389 | 1.6173358   | -1.6173358  |
| LRRC6    | 299920 | 0.894351    | -0.894351   |
| LRRC61   | 500111 | 1.6301228   | -1.6301228  |
| LRRC71   | 310689 | 1.3037688   | -1.3037688  |
| LRRC8B   | 305135 | -1.5113169  | 1.5113169   |
| LRRN1    | 500280 | 0.79205996  | -0.79205996 |
| LRRN3    | 81514  | 1.1927134   | -1.1927134  |
| LRRTM3   | 294380 | -0.68070257 | 0.68070257  |
| LRTM2    | 680883 | 1.338333    | -1.338333   |
| LTBP1    | 59107  | -0.5354814  | 0.5354814   |
| LUZP1    | 79428  | -0.898674   | 0.898674    |
| LYPD1    | 360838 | 0.981903    | -0.981903   |
| LYPLA2   | 83510  | 0.44875744  | -0.44875744 |
| LYRM7    | 686506 | 1.144265    | -1.144265   |
| LYRM9    | 497962 | 1.8536752   | -1.8536752  |
| LYVE1    | 293186 | -1.9220386  | 1.9220386   |
| LZIC     | 366507 | 0.5858828   | -0.5858828  |
| LZTFL1   | 316102 | 0.6239684   | -0.6239684  |
| LZTS1    | 266711 | 1.459883    | -1.459883   |
| M6PR     | 312689 | -0.55362326 | 0.55362326  |
| MAF1     | 315093 | 1.2809612   | -1.2809612  |
| MAFK     | 246760 | 0.609026    | -0.609026   |
| MAGED2   | 113947 | 1.1529831   | -1.1529831  |
| MAGEE2   | 302392 | 1.4546404   | -1.4546404  |
| MAL2     | 362911 | 1.1839454   | -1.1839454  |
| MAML3    | 310405 | -2.5122805  | 2.5122805   |
| MAN1A1   | 294410 | -2.6563742  | 2.6563742   |
| MAN1A2   | 295319 | -1.0048935  | 1.0048935   |
| MAN1C1   | 362625 | -1.4619563  | 1.4619563   |
| MAN2A1   | 25478  | -1.7447019  | 1.7447019   |
| MAP2K3   | 303200 | -1.8593556  | 1.8593556   |
| MAP2K4   | 287398 | -0.89620936 | 0.89620936  |
| MAP2K5   | 29568  | 0.8882246   | -0.8882246  |
| MAP2K6   | 114495 | 1.7449335   | -1.7449335  |
| MAP3K12  | 25579  | 1.0383974   | -1.0383974  |
| MAP3K7   | 313121 | -0.4686874  | 0.4686874   |
| MAP7D1   | 681287 | -0.6060024  | 0.6060024   |
| MAPK15   | 286997 | 2.5421202   | -2.5421202  |
| MAPK1IP1 | 499280 | 0.7967403   | -0.7967403  |
| MAPK3    | 50689  | 1.2152724   | -1.2152724  |
| MAS1     | 25153  | -1.5918338  | 1.5918338   |
| MAT2B    | 683630 | 0.6810566   | -0.6810566  |
| MB21D2   | 498100 | 0.7683288   | -0.7683288  |

|         |                |             |             |
|---------|----------------|-------------|-------------|
| MBLAC2  | 365627         | 0.65403515  | -0.65403515 |
| MC5R    | 25726          | -1.2832022  | 1.2832022   |
| MCCC2   | 361884         | 0.7789034   | -0.7789034  |
| MCEE    | 293829         | 1.3414524   | -1.3414524  |
| MCHR1   | 83567          | -1.8251122  | 1.8251122   |
| MCL1    | 60430          | -0.5577267  | 0.5577267   |
| MCM5    | 291885         | -0.33948404 | 0.33948404  |
| MCOLN3  | 308022         | -1.3112947  | 1.3112947   |
| ME1     | 24552          | -0.7285156  | 0.7285156   |
| MED15   | 360743         | -0.7941409  | 0.7941409   |
| MED4    | 306030         | 0.919518    | -0.919518   |
| MED9    | 497914         | 1.1482514   | -1.1482514  |
| MEIS2   | 311311         | -1.1404159  | 1.1404159   |
| MELTF   | 288038         | 1.8393661   | -1.8393661  |
| MEPCE   | 304361         | 0.7829449   | -0.7829449  |
| MEST    | 58827          | -0.84213364 | 0.84213364  |
| METRNL  | 316842         | -1.0411627  | 1.0411627   |
| METTL18 | 304928         | -0.6321552  | 0.6321552   |
| MFAP2   | 313662         | 0.541674    | -0.541674   |
| MFAP3L  | 306424         | -2.319295   | 2.319295    |
| MFN1    | 192647         | -0.5755169  | 0.5755169   |
| MFSD13A | 309454         | 0.64404565  | -0.64404565 |
| MFSD14B | 306687         | -0.8376799  | 0.8376799   |
| MFSD6   | 301388         | 0.665314    | -0.665314   |
| MFSD9   | 316356         | 0.5732246   | -0.5732246  |
| MGAT1   | 81519          | 0.5889136   | -0.5889136  |
| MGAT5B  | 303693         | 1.1863223   | -1.1863223  |
| MICAL2  | 365352         | -0.9250694  | 0.9250694   |
| MICU3   | 364601         | -0.73718745 | 0.73718745  |
| MINK1   | 303259         | -0.5068592  | 0.5068592   |
| MKRN1   | 296988         | 0.7501028   | -0.7501028  |
| MLLT3   | 114510         | -0.9280919  | 0.9280919   |
| MMP10   | 117061         | -4.506247   | 4.506247    |
| MMP13   | 171052         | -5.4765487  | 5.4765487   |
| MMP17   | 288626.chr12.2 | -0.74054533 | 0.74054533  |
| MMP3    | 171045         | -3.3737705  | 3.3737705   |
| MMS19   | 171124         | 0.6874268   | -0.6874268  |
| MNT     | 287521         | 0.9935537   | -0.9935537  |
| MON2    | 314894         | -0.6843731  | 0.6843731   |
| MORN4   | 293950         | 1.3041744   | -1.3041744  |
| MOSPD3  | 288557         | 0.751187    | -0.751187   |
| MPDU1   | 303244         | 1.1387473   | -1.1387473  |
| MPEG1   | 64552          | 0.9923391   | -0.9923391  |



|         |        |             |             |
|---------|--------|-------------|-------------|
| MPPED1  | 362971 | 1.5517403   | -1.5517403  |
| MPV17L2 | 290645 | 1.1072813   | -1.1072813  |
| MRM1    | 363661 | -0.40253547 | 0.40253547  |
| MRPL10  | 691075 | 0.88254374  | -0.88254374 |
| MRPL14  | 301250 | 1.6324209   | -1.6324209  |
| MRPL34  | 290632 | 1.77923     | -1.77923    |
| MRPS12  | 292758 | 1.1417923   | -1.1417923  |
| MRRF    | 311903 | 0.69935894  | -0.69935894 |
| MSL3L2  | 309790 | -1.0766865  | 1.0766865   |
| MSRB1   | 685059 | 1.255364    | -1.255364   |
| MSTN    | 29152  | 1.3471953   | -1.3471953  |
| MTERF2  | 366856 | 1.3015225   | -1.3015225  |
| MTHFD2  | 680308 | -0.6058509  | 0.6058509   |
| MTMR12  | 310155 | -2.155846   | 2.155846    |
| MTPAP   | 307050 | -0.4685971  | 0.4685971   |
| MTSS1   | 362918 | 1.1206813   | -1.1206813  |
| MTUS2   | 498136 | 2.035879    | -2.035879   |
| MUSK    | 81725  | -5.454042   | 5.454042    |
| MUSTN1  | 290553 | -0.9738472  | 0.9738472   |
| MVK     | 81727  | 1.5795974   | -1.5795974  |
| MXD4    | 360961 | 0.5827962   | -0.5827962  |
| MXI1    | 25701  | 0.50135267  | -0.50135267 |
| MYADML2 | 303744 | 2.5961335   | -2.5961335  |
| MYBPH   | 83708  | -0.956229   | 0.956229    |
| MYC     | 24577  | -0.7247556  | 0.7247556   |
| MYCL    | 298506 | 2.5626357   | -2.5626357  |
| MYH1    | 287408 | -2.2530081  | 2.2530081   |
| MYH4    | 360543 | -3.5680916  | 3.5680916   |
| MYH7    | 29557  | 1.8198395   | -1.8198395  |
| MYO1E   | 25484  | -2.8696394  | 2.8696394   |
| MYO9B   | 25486  | -0.92271817 | 0.92271817  |
| MYRIP   | 360034 | -1.1458832  | 1.1458832   |
| MYT1L   | 116668 | 1.4418831   | -1.4418831  |
| N4BP2L1 | 498131 | 0.57142353  | -0.57142353 |
| NAA40   | 361718 | -0.3950268  | 0.3950268   |
| NAAA    | 497009 | 1.1311554   | -1.1311554  |
| NAB2    | 314910 | -2.149525   | 2.149525    |
| NAGA    | 315165 | 0.841882    | -0.841882   |
| NAMPT   | 297508 | -1.0371566  | 1.0371566   |
| NAP1L3  | 170914 | 0.95103115  | -0.95103115 |
| NAPEPLD | 296757 | -1.5130607  | 1.5130607   |
| NARF    | 360681 | 1.2755058   | -1.2755058  |
| NAT14   | 361500 | 1.6346843   | -1.6346843  |

|           |           |             |             |
|-----------|-----------|-------------|-------------|
| NBR1      | 303554    | 0.380894    | -0.380894   |
| NCALD     | 553106    | 0.59072584  | -0.59072584 |
| NCBP1     | 298075    | -0.4643829  | 0.4643829   |
| NCBP3     | 360563    | -0.32995352 | 0.32995352  |
| NCOR2     | 360801    | -0.64690495 | 0.64690495  |
| NCSTN     | 289231    | 0.35748908  | -0.35748908 |
| NDRG4     | 64457     | 0.98793954  | -0.98793954 |
| NDST3     | 295430    | -1.1042091  | 1.1042091   |
| NDST4     | 362035    | 1.3141888   | -1.3141888  |
| NDUFAF4   | 362495    | -0.99508625 | 0.99508625  |
| NEDD9     | 291044    | -0.98134995 | 0.98134995  |
| NEFL      | 83613     | -1.707625   | 1.707625    |
| NET1      | 307098    | 0.47926953  | -0.47926953 |
| NETO1     | 307206    | -1.0864983  | 1.0864983   |
| NEUROD1   | 29458     | 1.0511507   | -1.0511507  |
| NEUROD2   | 54276     | 0.49624836  | -0.49624836 |
| NEUROD4   | 288821    | 0.92741853  | -0.92741853 |
| NFATC1    | 100361818 | -1.4382105  | 1.4382105   |
| NFIB      | 29227     | 0.49739763  | -0.49739763 |
| NFKBIE    | 316241    | 0.68254673  | -0.68254673 |
| NFRKB     | 315523    | -0.55807513 | 0.55807513  |
| NFX1      | 313166    | -0.36331108 | 0.36331108  |
| NGB       | 85382     | 1.2327213   | -1.2327213  |
| NGF       | 310738    | -1.8514184  | 1.8514184   |
| NHLH2     | 295327    | 1.1201491   | -1.1201491  |
| NIPSNAP1  | 360971    | 1.297048    | -1.297048   |
| NIPSNAP3B | 313211    | 1.4569368   | -1.4569368  |
| NIT1      | 289222    | 0.8626085   | -0.8626085  |
| NKAP      | 298342    | 1.2555282   | -1.2555282  |
| NKD1      | 364952    | 1.1703247   | -1.1703247  |
| NKIRAS2   | 287707    | 0.8874032   | -0.8874032  |
| NMBR      | 25264     | -0.97207475 | 0.97207475  |
| NME7      | 171566    | 0.61801004  | -0.61801004 |
| NOC3L     | 361753    | -0.6718607  | 0.6718607   |
| NOCT      | 310395    | -0.38256145 | 0.38256145  |
| NOG       | 25495     | -0.9140755  | 0.9140755   |
| NOL10     | 313981    | -0.3505987  | 0.3505987   |
| NOL3      | 85383     | 1.4650979   | -1.4650979  |
| NOP2      | 314969    | 0.28176972  | -0.28176972 |
| NOSIP     | 292894    | 1.5772415   | -1.5772415  |
| NOTCH4    | 406162    | 1.0245112   | -1.0245112  |
| NOV       | 81526     | 1.4443339   | -1.4443339  |
| NPAP60    | 25497     | -0.4197655  | 0.4197655   |

|         |        |             |             |
|---------|--------|-------------|-------------|
| NPL     | 304860 | -2.4390168  | 2.4390168   |
| NPLOC4  | 140639 | -0.4270526  | 0.4270526   |
| NPTX1   | 266777 | -2.6545897  | 2.6545897   |
| NPTX2   | 288475 | -3.609085   | 3.609085    |
| NPY1R   | 29358  | 1.4898225   | -1.4898225  |
| NPY2R   | 66024  | -1.3297244  | 1.3297244   |
| NR1D1   | 252917 | 0.50560164  | -0.50560164 |
| NR1D2   | 259241 | 0.41467774  | -0.41467774 |
| NR1I3   | 65035  | 0.6986578   | -0.6986578  |
| NR2F1   | 81808  | 1.0604424   | -1.0604424  |
| NRF1    | 312195 | -0.95736855 | 0.95736855  |
| NRIP1   | 304157 | 1.0291498   | -1.0291498  |
| NRIP3   | 361625 | -0.4573317  | 0.4573317   |
| NRN1    | 83834  | -2.2758472  | 2.2758472   |
| NRSN2   | 689978 | 1.8389419   | -1.8389419  |
| NTF3    | 81737  | 1.4229482   | -1.4229482  |
| NTM     | 50864  | 1.2541375   | -1.2541375  |
| NTRK3   | 29613  | -0.6188653  | 0.6188653   |
| NUAK1   | 299694 | 0.9856098   | -0.9856098  |
| NUB1    | 296731 | 0.8141831   | -0.8141831  |
| NUDT14  | 299346 | 1.9057776   | -1.9057776  |
| NUDT16  | 363129 | 1.4501662   | -1.4501662  |
| NUDT18  | 361068 | 1.2897798   | -1.2897798  |
| NUDT6   | 207120 | -1.108387   | 1.108387    |
| NUTM1   | 366153 | -1.0077661  | 1.0077661   |
| NVL     | 289323 | -0.4274949  | 0.4274949   |
| NYAP1   | 304376 | 2.2479792   | -2.2479792  |
| OGDHL   | 290566 | 0.8859162   | -0.8859162  |
| OGFOD1  | 307657 | -1.2811823  | 1.2811823   |
| OLIG2   | 304103 | -0.64515185 | 0.64515185  |
| OPRL1   | 29256  | 1.2142957   | -1.2142957  |
| ORAI2   | 304592 | 1.5564501   | -1.5564501  |
| OS9     | 362891 | 0.8949342   | -0.8949342  |
| OSBP2   | 305475 | -1.1393825  | 1.1393825   |
| OSBPL1A | 259221 | 0.4714191   | -0.4714191  |
| OSBPL2  | 296461 | 0.5098632   | -0.5098632  |
| OSBPL6  | 311129 | -1.4557711  | 1.4557711   |
| OSCAR   | 292537 | -1.0710164  | 1.0710164   |
| OSCP1   | 362595 | 0.8735821   | -0.8735821  |
| OTUD3   | 500572 | -1.2368755  | 1.2368755   |
| OVCA2   | 497954 | 0.8804624   | -0.8804624  |
| OXTR    | 25342  | -1.5087687  | 1.5087687   |
| P2RX2   | 114115 | 1.5780302   | -1.5780302  |

|          |        |             |             |
|----------|--------|-------------|-------------|
| P2RY1    | 25265  | 0.70958847  | -0.70958847 |
| P2RY14   | 171108 | -3.1473017  | 3.1473017   |
| P4HA1    | 64475  | -0.59373695 | 0.59373695  |
| PACSIN1  | 29704  | -0.7012393  | 0.7012393   |
| PACSIN2  | 124461 | -0.6784627  | 0.6784627   |
| PAFAH1B3 | 114113 | 1.4949573   | -1.4949573  |
| PAK6     | 296078 | -0.74153435 | 0.74153435  |
| PAK7     | 311450 | 0.50949806  | -0.50949806 |
| PALMD    | 310811 | 1.181603    | -1.181603   |
| PAM      | 25508  | -1.4187125  | 1.4187125   |
| PANX1    | 315435 | -1.0286161  | 1.0286161   |
| PAPOLA   | 314417 | -0.50829095 | 0.50829095  |
| PAPPA    | 313262 | -2.3755753  | 2.3755753   |
| PARD6A   | 307799 | 1.2980179   | -1.2980179  |
| PATL1    | 361736 | -0.7010471  | 0.7010471   |
| PAX1     | 311505 | -1.1285974  | 1.1285974   |
| PBX1     | 304947 | 0.7519762   | -0.7519762  |
| PCBP4    | 363133 | 0.9265226   | -0.9265226  |
| PCDH19   | 317183 | 1.8977797   | -1.8977797  |
| PCDH8    | 64865  | -1.3071531  | 1.3071531   |
| PCDHA10  | 116778 | 0.8411842   | -0.8411842  |
| PCDHA12  | 116779 | 0.84128857  | -0.84128857 |
| PCDHA2   | 393086 | 0.8769241   | -0.8769241  |
| PCDHA3   | 116780 | 0.68591297  | -0.68591297 |
| PCDHA4   | 116741 | 0.67511904  | -0.67511904 |
| PCDHA5   | 393087 | 0.6871557   | -0.6871557  |
| PCDHA6   | 393088 | 0.8123535   | -0.8123535  |
| PCDHA7   | 393089 | 0.75973856  | -0.75973856 |
| PCDHA9   | 393090 | 0.5936863   | -0.5936863  |
| PCDHGA2  | 498846 | 0.62522614  | -0.62522614 |
| PCGF2    | 287662 | 1.1421169   | -1.1421169  |
| PCGF5    | 681178 | -0.94097286 | 0.94097286  |
| PCSK1    | 25204  | -1.1705414  | 1.1705414   |
| PCSK4    | 171085 | 1.9182475   | -1.9182475  |
| PDCD6IP  | 501083 | -0.48611596 | 0.48611596  |
| PDE10A   | 63885  | -1.4955032  | 1.4955032   |
| PDE12    | 306231 | -0.8079652  | 0.8079652   |
| PDE6D    | 363272 | 1.5448804   | -1.5448804  |
| PDE8A    | 308776 | -3.1037586  | 3.1037586   |
| PDE9A    | 191569 | -0.9505414  | 0.9505414   |
| PDGFB    | 24628  | -2.7598     | 2.7598      |
| PDK1     | 116551 | -0.314967   | 0.314967    |
| PDP1     | 54705  | -1.9958472  | 1.9958472   |

|          |           |             |             |
|----------|-----------|-------------|-------------|
| PDSS2    | 365592    | 1.6004679   | -1.6004679  |
| PDXK     | 83578     | -2.4952135  | 2.4952135   |
| PDXP     | 727679    | 1.1974871   | -1.1974871  |
| PDZD8    | 308000    | -0.95551646 | 0.95551646  |
| PEAK1    | 315686    | -2.5138175  | 2.5138175   |
| PECAM1   | 29583     | 1.6324714   | -1.6324714  |
| PENK     | 29237     | -2.9786656  | 2.9786656   |
| PEO1     | 309441    | 1.0950004   | -1.0950004  |
| PEX14    | 64460     | 1.0501068   | -1.0501068  |
| PFKFB3   | 117276    | -2.1468453  | 2.1468453   |
| PGD      | 100360180 | 0.7458782   | -0.7458782  |
| PHACTR1  | 306844    | 0.7627509   | -0.7627509  |
| PHACTR3  | 362284    | 0.9712113   | -0.9712113  |
| PHEX     | 25512     | -3.0974095  | 3.0974095   |
| PHF14    | 500030    | 0.48963156  | -0.48963156 |
| PHF20    | 311575    | 0.6254803   | -0.6254803  |
| PHLDA1   | 29380     | -1.0356759  | 1.0356759   |
| PHOSPHO2 | 295663    | -0.24552187 | 0.24552187  |
| PI16     | 294312    | 1.547693    | -1.547693   |
| PIANP    | 312711    | 1.1342764   | -1.1342764  |
| PIEZO1   | 361430    | -1.1661532  | 1.1661532   |
| PIGM     | 79112     | -1.5399154  | 1.5399154   |
| PIH1D1   | 292898    | 1.2580909   | -1.2580909  |
| PIK3C3   | 65052     | 1.0280429   | -1.0280429  |
| PIK3CB   | 85243     | -0.8965338  | 0.8965338   |
| PIK3CD   | 366508    | 2.0016377   | -2.0016377  |
| PIK3IP1  | 305472    | 1.0467699   | -1.0467699  |
| PITX1    | 113983    | -3.433762   | 3.433762    |
| PJA2     | 192256    | 0.38071728  | -0.38071728 |
| PKD2     | 498328    | -1.0872481  | 1.0872481   |
| PKLR     | 24651     | 2.0960937   | -2.0960937  |
| PKNOX1   | 294322    | -0.9983487  | 0.9983487   |
| PKNOX2   | 680549    | 0.7530365   | -0.7530365  |
| PLA2G4A  | 24653     | -1.7562926  | 1.7562926   |
| PLAGL1   | 25157     | -0.4995203  | 0.4995203   |
| PLAUR    | 50692     | -4.892946   | 4.892946    |
| PLCL1    | 84587     | -2.184532   | 2.184532    |
| PLCXD2   | 363781    | 1.5329875   | -1.5329875  |
| PLEKHG5  | 310999    | -1.0774326  | 1.0774326   |
| PLEKHH2  | 313866    | -2.63918    | 2.63918     |
| PLK2     | 83722     | -0.8687869  | 0.8687869   |
| PLK4     | 310344    | -0.31353673 | 0.31353673  |
| PLPPR3   | 314614    | 1.3086072   | -1.3086072  |

|          |        |             |             |
|----------|--------|-------------|-------------|
| PLPPR4   | 295401 | -0.35939395 | 0.35939395  |
| PLXNA2   | 289392 | -1.0976771  | 1.0976771   |
| PLXND1   | 312652 | 0.890478    | -0.890478   |
| PMP22    | 24660  | -0.6559772  | 0.6559772   |
| PMVK     | 310645 | 1.8580743   | -1.8580743  |
| PNCK     | 29660  | 1.7745042   | -1.7745042  |
| PNMA2    | 305977 | 1.2323488   | -1.2323488  |
| PNMAL1   | 361515 | 1.4421582   | -1.4421582  |
| PNMAL2   | 308393 | 0.617953    | -0.617953   |
| PNPO     | 64533  | 0.6252789   | -0.6252789  |
| PNRC1    | 286988 | 1.235424    | -1.235424   |
| PODXL    | 192181 | 0.6308847   | -0.6308847  |
| PODXL2   | 297433 | 1.2327952   | -1.2327952  |
| POLD1    | 59294  | 0.31041476  | -0.31041476 |
| POLE4    | 362385 | 1.2117931   | -1.2117931  |
| POLG     | 85472  | -1.0260669  | 1.0260669   |
| POLL     | 361767 | 1.2602353   | -1.2602353  |
| POLR1A   | 83581  | -0.618907   | 0.618907    |
| POLR3E   | 361640 | -0.6538515  | 0.6538515   |
| POMK     | 306549 | 0.8079559   | -0.8079559  |
| POP1     | 315045 | -0.6307121  | 0.6307121   |
| POPDC2   | 360718 | 1.4212865   | -1.4212865  |
| POPDC3   | 641520 | -0.6938103  | 0.6938103   |
| POU4F2   | 171355 | -4.1835046  | 4.1835046   |
| POU4F3   | 364855 | -3.2644193  | 3.2644193   |
| POU6F1   | 116545 | -1.1412504  | 1.1412504   |
| PPEF1    | 317498 | 1.2263446   | -1.2263446  |
| PPFIA4   | 140592 | 1.3249093   | -1.3249093  |
| PPHLN1   | 366975 | -0.89656925 | 0.89656925  |
| PPIF     | 282819 | -0.40926883 | 0.40926883  |
| PPM1H    | 314897 | -0.7404914  | 0.7404914   |
| PPP1CA   | 24668  | 0.3484464   | -0.3484464  |
| PPP1R12A | 116670 | -0.4603236  | 0.4603236   |
| PPP1R18  | 361790 | 1.5800347   | -1.5800347  |
| PPP2R2B  | 60660  | 1.0847508   | -1.0847508  |
| PPP2R3A  | 363122 | 0.93942696  | -0.93942696 |
| PPP2R5A  | 312754 | -0.5296165  | 0.5296165   |
| PPP3CC   | 171378 | 0.7928479   | -0.7928479  |
| PPP4R3A  | 314388 | -0.26442242 | 0.26442242  |
| PPRC1    | 294007 | -0.74539727 | 0.74539727  |
| PRAGMIN  | 306506 | -1.5715748  | 1.5715748   |
| PRICKLE1 | 315259 | -1.5160234  | 1.5160234   |
| PRIMA1   | 690195 | -4.5349665  | 4.5349665   |

|         |              |             |             |
|---------|--------------|-------------|-------------|
| PRKAA1  | 65248        | -0.53383154 | 0.53383154  |
| PRKAR2A | 29699        | -1.7279683  | 1.7279683   |
| PRKCQ   | 85420        | 0.6951319   | -0.6951319  |
| PRKCZ   | 25522        | 0.98278683  | -0.98278683 |
| PRKG2   | 25523        | -1.4253035  | 1.4253035   |
| PRKRA   | 311130       | 1.2576514   | -1.2576514  |
| PRMT2   | 499420       | 1.3451191   | -1.3451191  |
| PRR13   | 363004       | 0.84493697  | -0.84493697 |
| PRR15   | 312358       | -1.0145926  | 1.0145926   |
| PRRT1   | 406167       | 1.2082696   | -1.2082696  |
| PRRT2   | 361651       | 0.9984324   | -0.9984324  |
| PRRT4   | 500059       | 1.8222485   | -1.8222485  |
| PRSS12  | 85266        | 1.6767384   | -1.6767384  |
| PRSS23  | 308807       | -2.5837831  | 2.5837831   |
| PRSS35  | 315866       | -2.0219622  | 2.0219622   |
| PRUNE   | 310664       | 0.6687089   | -0.6687089  |
| PSD2    | 307500       | 1.2645555   | -1.2645555  |
| SENEEN  | 292788       | 1.3393663   | -1.3393663  |
| PSME3   | 287716       | -0.2551777  | 0.2551777   |
| PSME4   | 498433       | -0.70672363 | 0.70672363  |
| PSMG1   | 288236       | 1.2615643   | -1.2615643  |
| PSTPIP2 | 307248       | -1.2847602  | 1.2847602   |
| PTAFR   | 58949        | -4.0518913  | 4.0518913   |
| PTBP1   | 29497        | -0.45423856 | 0.45423856  |
| PTCHD1  | 317517       | -1.8570472  | 1.8570472   |
| PTGER4  | 84023        | -2.125272   | 2.125272    |
| PTGS2   | 29527        | -2.3201041  | 2.3201041   |
| PTH2R   | 81753        | -2.445413   | 2.445413    |
| PTPDC1  | 291022       | -0.88963217 | 0.88963217  |
| PTPN1   | 24697        | -0.3797934  | 0.3797934   |
| PTPRE   | 114767       | -0.6064726  | 0.6064726   |
| PTPRH   | 171125       | 1.9810252   | -1.9810252  |
| PTPRN   | 116660       | -0.87433666 | 0.87433666  |
| PTPRR   | 94202.chr7.2 | 2.134171    | -2.134171   |
| PURG    | 361162       | -0.59971136 | 0.59971136  |
| PUS3    | 315554       | -0.87038594 | 0.87038594  |
| PUS7    | 296751       | -0.7606243  | 0.7606243   |
| PVR     | 25066        | -1.5210682  | 1.5210682   |
| PVRL1   | 192183       | -0.618076   | 0.618076    |
| PWWP2B  | 361671       | -0.5893987  | 0.5893987   |
| PXN     | 360820       | -0.61022323 | 0.61022323  |
| QDPR    | 64192        | 1.2607766   | -1.2607766  |
| QPCT    | 313837       | 1.2014691   | -1.2014691  |

|          |        |             |             |
|----------|--------|-------------|-------------|
| R3HDM1   | 304763 | -0.93854046 | 0.93854046  |
| RAB11B   | 79434  | 0.882444    | -0.882444   |
| RAB20    | 689377 | -1.370957   | 1.370957    |
| RAB27B   | 84590  | -1.699384   | 1.699384    |
| RAB2B    | 305853 | 0.8936181   | -0.8936181  |
| RAB30    | 308821 | 1.1979102   | -1.1979102  |
| RAB33A   | 317580 | 2.0812652   | -2.0812652  |
| RAB36    | 690407 | 1.0716302   | -1.0716302  |
| RAB3A    | 25531  | 1.0002227   | -1.0002227  |
| RAB3D    | 140665 | 1.7104299   | -1.7104299  |
| RAB43    | 500249 | -1.0554436  | 1.0554436   |
| RAB9B    | 367915 | 0.6534948   | -0.6534948  |
| RAD21    | 314949 | 0.46561742  | -0.46561742 |
| RAI14    | 294804 | -1.4602149  | 1.4602149   |
| RALGAPA1 | 56785  | -0.4897604  | 0.4897604   |
| RALGDS   | 29622  | 0.93801826  | -0.93801826 |
| RALYL    | 294883 | 1.3761951   | -1.3761951  |
| RAMP2    | 58966  | 1.5750382   | -1.5750382  |
| RAMP3    | 56820  | 2.9852746   | -2.9852746  |
| RANBP6   | 309326 | -0.20998384 | 0.20998384  |
| RAP1B    | 171337 | -0.7228956  | 0.7228956   |
| RASA1    | 25676  | -0.7775865  | 0.7775865   |
| RASAL2   | 304893 | -1.3808692  | 1.3808692   |
| RASGEF1C | 360519 | 1.6070697   | -1.6070697  |
| RASGRF1  | 192213 | 0.5586639   | -0.5586639  |
| RASGRP2  | 361714 | 1.6968195   | -1.6968195  |
| RASIP1   | 292912 | 1.7952964   | -1.7952964  |
| RASL11A  | 304268 | -3.7108407  | 3.7108407   |
| RASSF8   | 312846 | -3.7016206  | 3.7016206   |
| RAVER1   | 298705 | -0.3390794  | 0.3390794   |
| RBAK     | 288489 | -0.7255992  | 0.7255992   |
| RBFA     | 307235 | 1.1691409   | -1.1691409  |
| RBM11    | 288321 | 2.2333245   | -2.2333245  |
| RBM12    | 652928 | -0.8207188  | 0.8207188   |
| RBM24    | 690139 | 1.451968    | -1.451968   |
| RBM46    | 310548 | 1.0298349   | -1.0298349  |
| RBMS1    | 362138 | -1.9032842  | 1.9032842   |
| BPMS     | 498642 | -0.87195694 | 0.87195694  |
| RCAN2    | 140666 | -0.7658639  | 0.7658639   |
| RDH10    | 353252 | -1.5777113  | 1.5777113   |
| REEP1    | 362384 | 0.88295263  | -0.88295263 |
| REEP2    | 682105 | 0.91989726  | -0.91989726 |
| REM2     | 64626  | -0.6479169  | 0.6479169   |



|            |        |             |             |
|------------|--------|-------------|-------------|
| RET        | 24716  | -1.3632734  | 1.3632734   |
| RFXAP      | 499617 | -0.5034862  | 0.5034862   |
| RGD1304810 | 306504 | -1.4057148  | 1.4057148   |
| RGD1305014 | 309029 | -0.93383926 | 0.93383926  |
| RGD1305587 | 294499 | 2.1736956   | -2.1736956  |
| RGD1306227 | 310377 | 0.99300516  | -0.99300516 |
| RGD1307443 | 361244 | 0.8686419   | -0.8686419  |
| RGD1307461 | 300990 | 1.7910181   | -1.7910181  |
| RGD1308147 | 307008 | -0.3366559  | 0.3366559   |
| RGD1309028 | 299265 | 1.2496943   | -1.2496943  |
| RGD1309079 | 315891 | -0.5708009  | 0.5708009   |
| RGD1310110 | 361032 | 1.0895427   | -1.0895427  |
| RGD1310769 | 299207 | 1.0653373   | -1.0653373  |
| RGD1312005 | 291580 | 1.0583966   | -1.0583966  |
| RGD1560108 | 499309 | 0.961564    | -0.961564   |
| RGD1561849 | 500393 | -1.1715535  | 1.1715535   |
| RGD1561931 | 302396 | 0.8947085   | -0.8947085  |
| RGD1563072 | 313595 | 1.8446188   | -1.8446188  |
| RGD1564036 | 497895 | 1.2878602   | -1.2878602  |
| RGD1564804 | 313551 | 1.4052379   | -1.4052379  |
| RGS12      | 54292  | 1.0016395   | -1.0016395  |
| RGS14      | 114705 | 1.3399516   | -1.3399516  |
| RGS16      | 360857 | -2.010148   | 2.010148    |
| RGS17      | 308118 | -0.698156   | 0.698156    |
| RGS2       | 84583  | -0.40462452 | 0.40462452  |
| RGS20      | 362477 | -1.5197148  | 1.5197148   |
| RGS4       | 29480  | -1.4679604  | 1.4679604   |
| RGS5       | 54294  | -2.4916008  | 2.4916008   |
| RHBDF2     | 303690 | 2.3448224   | -2.3448224  |
| RHBDL1     | 117025 | 1.6193181   | -1.6193181  |
| RHOQ       | 85428  | -1.2808673  | 1.2808673   |
| RHOV       | 171581 | 2.48307     | -2.48307    |
| RHPN2      | 308516 | 0.9445657   | -0.9445657  |
| RIN1       | 207119 | -2.4847422  | 2.4847422   |
| RIT1       | 499652 | 0.43847728  | -0.43847728 |
| RIT2       | 291713 | 1.3842981   | -1.3842981  |
| RNASEH2A   | 364974 | 1.6685215   | -1.6685215  |
| RND1       | 362993 | 1.7105467   | -1.7105467  |
| RNF111     | 300813 | -0.30827323 | 0.30827323  |
| RNF145     | 287212 | 0.68509424  | -0.68509424 |
| RNF150     | 364983 | -0.74297404 | 0.74297404  |
| RNF152     | 293561 | 1.9067645   | -1.9067645  |
| RNF167     | 360554 | 0.67522365  | -0.67522365 |

|         |        |             |             |
|---------|--------|-------------|-------------|
| RNF180  | 685384 | 0.40405306  | -0.40405306 |
| RNF182  | 498726 | 1.5751994   | -1.5751994  |
| RNF19B  | 313806 | 0.6673586   | -0.6673586  |
| RNF217  | 292188 | -0.64998645 | 0.64998645  |
| RNF34   | 282845 | 0.41530994  | -0.41530994 |
| RNF39   | 171387 | -0.73396945 | 0.73396945  |
| RNF5    | 407784 | 1.0183594   | -1.0183594  |
| RNFT2   | 304521 | 0.75005347  | -0.75005347 |
| RNGTT   | 313131 | 0.5777789   | -0.5777789  |
| ROCK2   | 25537  | -0.97574705 | 0.97574705  |
| RP3A    | 171039 | 0.8633184   | -0.8633184  |
| RPS6KA2 | 117269 | 1.3743302   | -1.3743302  |
| RPS6KA3 | 501560 | -0.86574256 | 0.86574256  |
| RPS6KA5 | 314384 | 0.6330049   | -0.6330049  |
| RPS6KA6 | 317203 | -0.65257776 | 0.65257776  |
| RPS6KB1 | 83840  | -0.6176701  | 0.6176701   |
| RRAD    | 83521  | -3.126623   | 3.126623    |
| RRAGD   | 297960 | 0.9920717   | -0.9920717  |
| RRP8    | 308911 | -0.91041267 | 0.91041267  |
| RSPO3   | 498997 | 1.8153454   | -1.8153454  |
| RSRP1   | 362626 | -0.6119179  | 0.6119179   |
| RT1-S3  | 294228 | -2.6764774  | 2.6764774   |
| RTF1    | 366169 | 0.8068774   | -0.8068774  |
| RTFDC1  | 296410 | 0.5922399   | -0.5922399  |
| RTN4RL1 | 303311 | -1.1240036  | 1.1240036   |
| RTN4RL2 | 311169 | -1.19438    | 1.19438     |
| RUNX1   | 50662  | -2.4223049  | 2.4223049   |
| RUNX1T1 | 362489 | 0.62385863  | -0.62385863 |
| RUNX2   | 367218 | -1.8867472  | 1.8867472   |
| RXFP3   | 294807 | -2.7440076  | 2.7440076   |
| RXRB    | 361801 | 1.4743892   | -1.4743892  |
| RXRG    | 83574  | 2.587212    | -2.587212   |
| RYBP    | 312603 | -0.2905089  | 0.2905089   |
| RYK     | 140585 | -0.49521574 | 0.49521574  |
| SAMD4A  | 305826 | -2.2564552  | 2.2564552   |
| SAMD5   | 365038 | -1.5033222  | 1.5033222   |
| SAMHD1  | 311580 | -0.70444477 | 0.70444477  |
| SAP30BP | 360662 | -0.2611519  | 0.2611519   |
| SATB1   | 316164 | 0.87971145  | -0.87971145 |
| SC5D    | 114100 | -0.57787454 | 0.57787454  |
| SCG2    | 24765  | -2.7256134  | 2.7256134   |
| SCLY    | 363285 | 0.79577345  | -0.79577345 |
| SCN1A   | 81574  | 1.082227    | -1.082227   |

|          |        |             |             |
|----------|--------|-------------|-------------|
| SCN1B    | 29686  | -2.0425715  | 2.0425715   |
| SCN2A    | 24766  | 1.2908763   | -1.2908763  |
| SCN3B    | 245956 | 0.8881229   | -0.8881229  |
| SCN4A    | 25722  | 2.258376    | -2.258376   |
| SCNN1G   | 24768  | -1.5599666  | 1.5599666   |
| SCRT2    | 366229 | -2.0606408  | 2.0606408   |
| SDC1     | 25216  | -1.3037148  | 1.3037148   |
| SDCBP    | 83841  | -0.3909704  | 0.3909704   |
| SDCCAG8  | 305002 | 1.5519366   | -1.5519366  |
| SDHC     | 289217 | 0.9934685   | -0.9934685  |
| SDK2     | 360652 | -1.9475592  | 1.9475592   |
| SDR39U1  | 361044 | 1.1415017   | -1.1415017  |
| SEC13    | 297522 | 0.3394574   | -0.3394574  |
| SEC16B   | 89868  | -2.1565294  | 2.1565294   |
| SEC24B   | 295461 | -0.5457721  | 0.5457721   |
| SEC24D   | 310843 | -1.615148   | 1.615148    |
| SELE     | 25544  | -1.9188021  | 1.9188021   |
| SEMA3A   | 29751  | -2.3533933  | 2.3533933   |
| SEMA3D   | 246262 | -1.2178336  | 1.2178336   |
| SEMA3E   | 296789 | -0.8667002  | 0.8667002   |
| SEMA4F   | 29745  | 1.4172438   | -1.4172438  |
| SEMA4G   | 361764 | 1.1764392   | -1.1764392  |
| SEMA6B   | 84609  | 1.1183448   | -1.1183448  |
| SEMA6C   | 29744  | 2.2092333   | -2.2092333  |
| SEPHS1   | 291314 | -0.42142496 | 0.42142496  |
| SERPINB2 | 60325  | -4.882518   | 4.882518    |
| SERPINB8 | 288937 | -2.8327084  | 2.8327084   |
| SERTAD1  | 361526 | -1.5891567  | 1.5891567   |
| SERTM1   | 690333 | -0.82669574 | 0.82669574  |
| SESN1    | 294518 | 1.064322    | -1.064322   |
| SFI1     | 305467 | 0.84867126  | -0.84867126 |
| SFMBT1   | 58967  | -0.62853    | 0.62853     |
| SFMBT2   | 307106 | -1.643639   | 1.643639    |
| SFRP4    | 89803  | -1.0778743  | 1.0778743   |
| SGCA     | 303468 | -1.9697973  | 1.9697973   |
| SGMS1    | 353229 | -0.8720232  | 0.8720232   |
| SH2B2    | 114203 | 1.1817917   | -1.1817917  |
| SH2D3C   | 362111 | 3.8986006   | -3.8986006  |
| SH3BP1   | 300067 | -0.7575102  | 0.7575102   |
| SH3BP5   | 117186 | 1.111334    | -1.111334   |
| SH3GLB1  | 292156 | -0.39560103 | 0.39560103  |
| SHC4     | 679845 | -2.4207256  | 2.4207256   |
| SHISA5   | 301013 | 0.8572069   | -0.8572069  |

|          |               |             |             |
|----------|---------------|-------------|-------------|
| SHQ1     | 297483.chr4.1 | -0.90175235 | 0.90175235  |
| SHROOM2  | 317435        | 0.94060034  | -0.94060034 |
| SHROOM4  | 317391        | -3.285885   | 3.285885    |
| SHTN1    | 292139        | 0.7538315   | -0.7538315  |
| SI AH3   | 692004        | -2.7351675  | 2.7351675   |
| SIDT1    | 288109        | 0.9055039   | -0.9055039  |
| SIK1     | 59329         | -1.636797   | 1.636797    |
| SIK3     | 684112        | -1.1976771  | 1.1976771   |
| SIL1     | 291673        | 1.5942905   | -1.5942905  |
| SIM1     | 309888        | -2.920881   | 2.920881    |
| SIN3A    | 363067        | 0.41163677  | -0.41163677 |
| SIPA1L2  | 361442        | -0.8146569  | 0.8146569   |
| SIRT3    | 293615        | 1.1229125   | -1.1229125  |
| SIRT5    | 306840        | 1.8049828   | -1.8049828  |
| SKP2     | 294790        | -1.1556857  | 1.1556857   |
| SLAIN2   | 305310        | -0.46348232 | 0.46348232  |
| SLC16A14 | 316578        | -2.186105   | 2.186105    |
| SLC16A8  | 65200         | -1.2989899  | 1.2989899   |
| SLC17A5  | 363103        | 0.6097403   | -0.6097403  |
| SLC17A6  | 84487         | -0.9674586  | 0.9674586   |
| SLC18A2  | 25549         | -0.6991742  | 0.6991742   |
| SLC1A6   | 84012         | 1.3026911   | -1.3026911  |
| SLC22A1  | 24904         | 4.297857    | -4.297857   |
| SLC22A3  | 29504         | 2.5468235   | -2.5468235  |
| SLC24A4  | 314396        | -0.37487805 | 0.37487805  |
| SLC25A14 | 85263         | 0.5005022   | -0.5005022  |
| SLC25A20 | 117035        | 0.8498117   | -0.8498117  |
| SLC25A37 | 306000        | -1.8937051  | 1.8937051   |
| SLC25A39 | 360636        | 1.3247854   | -1.3247854  |
| SLC27A2  | 65192         | 1.1857318   | -1.1857318  |
| SLC28A3  | 140944        | 1.9427401   | -1.9427401  |
| SLC2A3   | 25551         | -1.5491256  | 1.5491256   |
| SLC30A10 | 289353        | -1.2617816  | 1.2617816   |
| SLC30A3  | 366568        | -0.72683805 | 0.72683805  |
| SLC30A4  | 64469         | -0.8386116  | 0.8386116   |
| SLC35B4  | 296969        | 0.3722925   | -0.3722925  |
| SLC35D1  | 298280        | -1.6176689  | 1.6176689   |
| SLC35D3  | 308717        | -1.6887423  | 1.6887423   |
| SLC35E3  | 362883        | -0.41176802 | 0.41176802  |
| SLC35F5  | 288993        | 0.37466466  | -0.37466466 |
| SLC37A4  | 29573         | 1.1339908   | -1.1339908  |
| SLC40A1  | 170840        | -2.2319286  | 2.2319286   |
| SLC41A2  | 362861        | -1.2773671  | 1.2773671   |

|         |        |             |             |
|---------|--------|-------------|-------------|
| SLC4A11 | 311423 | -1.7083405  | 1.7083405   |
| SLC4A7  | 117955 | -2.0753016  | 2.0753016   |
| SLC5A10 | 303205 | -1.8730152  | 1.8730152   |
| SLC5A3  | 114507 | -1.519374   | 1.519374    |
| SLC5A8  | 500820 | -1.7296529  | 1.7296529   |
| SLC6A15 | 282712 | 0.711413    | -0.711413   |
| SLC6A17 | 613226 | -1.3041549  | 1.3041549   |
| SLC6A7  | 117100 | 1.1860822   | -1.1860822  |
| SLC6A8  | 50690  | -0.67422664 | 0.67422664  |
| SLC9A2  | 24783  | -1.3528452  | 1.3528452   |
| SLC9B2  | 679958 | 1.9674516   | -1.9674516  |
| SLCO2A1 | 24546  | -4.5949497  | 4.5949497   |
| SLCO3A1 | 140915 | -1.3849361  | 1.3849361   |
| SLCO4A1 | 171144 | 1.2394837   | -1.2394837  |
| SLITRK4 | 302473 | 0.9764185   | -0.9764185  |
| SMAD3   | 25631  | -2.0338812  | 2.0338812   |
| SMAGP   | 300236 | -2.016632   | 2.016632    |
| SMARCA2 | 361745 | 0.8919621   | -0.8919621  |
| SMARCD3 | 296732 | 1.4601693   | -1.4601693  |
| SMIM17  | 499067 | 1.050431    | -1.050431   |
| SMIM20  | 501923 | 1.1410125   | -1.1410125  |
| SMIM3   | 286910 | 0.81856567  | -0.81856567 |
| SMOC2   | 292401 | 2.2719147   | -2.2719147  |
| SMPD3   | 94338  | 1.0461674   | -1.0461674  |
| SMPDL3B | 362619 | -2.7852929  | 2.7852929   |
| SMR3B   | 24867  | -1.3570703  | 1.3570703   |
| SMTN    | 289734 | -1.9741095  | 1.9741095   |
| SMYD5   | 312503 | 0.71387887  | -0.71387887 |
| SNCA    | 29219  | 1.2924238   | -1.2924238  |
| SNN     | 29140  | 0.44895124  | -0.44895124 |
| SNRNP40 | 313056 | 0.3734343   | -0.3734343  |
| SNX9    | 683687 | -1.3578744  | 1.3578744   |
| SOAT1   | 81782  | -1.5339559  | 1.5339559   |
| SOCS3   | 89829  | -1.716651   | 1.716651    |
| SOGA3   | 292199 | 0.7784561   | -0.7784561  |
| SORBS2  | 114901 | -1.709716   | 1.709716    |
| SOX4    | 364712 | 1.2455767   | -1.2455767  |
| SP7     | 300260 | -4.5945225  | 4.5945225   |
| SPAST   | 362700 | 0.5576073   | -0.5576073  |
| SPATA2L | 498963 | -0.4327329  | 0.4327329   |
| SPCS3   | 680782 | -0.78490406 | 0.78490406  |
| SPHK1   | 170897 | -3.063561   | 3.063561    |
| SPHKAP  | 316561 | 1.4794879   | -1.4794879  |

|            |           |             |             |
|------------|-----------|-------------|-------------|
| SPIRE1     | 307348    | -0.45116532 | 0.45116532  |
| SPIRE2     | 307925    | 1.3488461   | -1.3488461  |
| SPNS2      | 100270678 | -0.66034466 | 0.66034466  |
| SPOP       | 287643    | 1.0444767   | -1.0444767  |
| SPRED3     | 308478    | -1.8490422  | 1.8490422   |
| SPRR1A     | 499660    | -5.059616   | 5.059616    |
| SPRTN      | 292101    | -1.1680199  | 1.1680199   |
| SPRY2      | 306141    | -1.6108091  | 1.6108091   |
| SPRY4      | 291610    | -2.687808   | 2.687808    |
| SPSB1      | 313722    | -2.0201378  | 2.0201378   |
| SQLE       | 29230     | 0.30901468  | -0.30901468 |
| SRD5A1     | 24950     | 0.84864455  | -0.84864455 |
| SRPK1      | 361811    | -0.41135523 | 0.41135523  |
| SRPRA      | 315548    | -0.29907146 | 0.29907146  |
| SRRM3      | 685890    | 0.9302858   | -0.9302858  |
| SRSF9      | 288701    | 0.4320581   | -0.4320581  |
| SRXN1      | 296271    | -4.2581544  | 4.2581544   |
| SS18       | 361295    | -0.85127825 | 0.85127825  |
| SSR1       | 361233    | -0.19632502 | 0.19632502  |
| SSTR2      | 54305     | -0.9175802  | 0.9175802   |
| SSTR3      | 171044    | -3.1048226  | 3.1048226   |
| SSTR4      | 25555     | -1.9505814  | 1.9505814   |
| ST18       | 266680    | -1.01843    | 1.01843     |
| ST3GAL2    | 64442     | 0.8283027   | -0.8283027  |
| ST3GAL3    | 64445     | 0.82038593  | -0.82038593 |
| ST6GAL1    | 25197     | -0.36678654 | 0.36678654  |
| ST6GALNAC6 | 407765    | 0.9609258   | -0.9609258  |
| ST8SIA5    | 364901    | -2.471564   | 2.471564    |
| STAC2      | 363674    | -0.914047   | 0.914047    |
| STAMPB     | 171565    | 0.9105669   | -0.9105669  |
| STC2       | 63878     | -1.6325964  | 1.6325964   |
| STEAP1     | 297738    | -1.2303724  | 1.2303724   |
| STEAP2     | 312052    | -0.30343154 | 0.30343154  |
| STIM1      | 361618    | 0.4927793   | -0.4927793  |
| STK26      | 317589    | -3.2381546  | 3.2381546   |
| STOML1     | 300748    | 1.3919854   | -1.3919854  |
| STRADA     | 303605    | 0.83367527  | -0.83367527 |
| STT3B      | 363160    | -0.8150197  | 0.8150197   |
| STX11      | 292483    | -3.5040588  | 3.5040588   |
| SULT2B1    | 292915    | 1.1133765   | -1.1133765  |
| SUN1       | 360773    | -0.8405576  | 0.8405576   |
| SUOX       | 81805     | 0.60807633  | -0.60807633 |
| SV2A       | 117559    | 1.0175225   | -1.0175225  |

|         |        |             |             |
|---------|--------|-------------|-------------|
| SV2B    | 117556 | 1.2700803   | -1.2700803  |
| SV2C    | 29643  | -3.5015628  | 3.5015628   |
| SVBP    | 362578 | 1.7390351   | -1.7390351  |
| SVOP    | 171442 | 1.1907222   | -1.1907222  |
| SYK     | 25155  | -0.5262172  | 0.5262172   |
| SYNJ2   | 84018  | -1.7209162  | 1.7209162   |
| SYNPO   | 60324  | -1.3905915  | 1.3905915   |
| SYPL2   | 362018 | -2.3790407  | 2.3790407   |
| SYT10   | 60567  | -3.5787656  | 3.5787656   |
| SYT12   | 191595 | -0.9574822  | 0.9574822   |
| SYT13   | 80977  | 0.60884726  | -0.60884726 |
| SYT3    | 25731  | 1.6051745   | -1.6051745  |
| SYT6    | 60565  | -0.7595564  | 0.7595564   |
| SYT9    | 60564  | 0.75644463  | -0.75644463 |
| SYTL5   | 302538 | -1.7463497  | 1.7463497   |
| TAC1    | 24806  | -1.1776572  | 1.1776572   |
| TACC1   | 306562 | -1.1586126  | 1.1586126   |
| TACR2   | 25007  | -2.0917666  | 2.0917666   |
| TACR3   | 24808  | -2.047815   | 2.047815    |
| TADA2B  | 289717 | -0.44116637 | 0.44116637  |
| TAF12   | 682902 | -0.5072301  | 0.5072301   |
| TAGAP   | 308097 | -1.8094736  | 1.8094736   |
| TARS    | 294810 | -0.57766813 | 0.57766813  |
| TAS1R3  | 170634 | -1.8621123  | 1.8621123   |
| TBC1D14 | 360956 | 0.71468055  | -0.71468055 |
| TBC1D17 | 292886 | 1.2522173   | -1.2522173  |
| TBC1D25 | 302552 | 0.55837303  | -0.55837303 |
| TBC1D9  | 304645 | 0.7860574   | -0.7860574  |
| TBCK    | 295446 | 0.8337724   | -0.8337724  |
| TBX21   | 303496 | -1.7847887  | 1.7847887   |
| TCEAL1  | 302593 | 0.9830134   | -0.9830134  |
| TCP11L2 | 314683 | 0.6612161   | -0.6612161  |
| TCTN1   | 304486 | 0.77660185  | -0.77660185 |
| TDRD6   | 316254 | 2.2980094   | -2.2980094  |
| TEAD1   | 361630 | -2.510715   | 2.510715    |
| TEF     | 29362  | 0.608276    | -0.608276   |
| TEKT2   | 298532 | 1.7960329   | -1.7960329  |
| TENM3   | 306451 | 0.9096696   | -0.9096696  |
| TEX264  | 300988 | 1.285548    | -1.285548   |
| TFAP4   | 360482 | 0.829667    | -0.829667   |
| TGFB1   | 59086  | -0.9455964  | 0.9455964   |
| TGFBR2  | 81810  | -2.4523053  | 2.4523053   |
| TGIF1   | 316742 | -1.1005571  | 1.1005571   |

|           |        |             |             |
|-----------|--------|-------------|-------------|
| THBD      | 83580  | -1.7839245  | 1.7839245   |
| THNSL1    | 498805 | 0.4096687   | -0.4096687  |
| THRB      | 24831  | -1.8771453  | 1.8771453   |
| THSD7A    | 500032 | 0.6431325   | -0.6431325  |
| TIGAR     | 502894 | -0.43789047 | 0.43789047  |
| TIMP1     | 116510 | -1.594023   | 1.594023    |
| TLK2      | 303592 | -0.35235876 | 0.35235876  |
| TM4SF1    | 295061 | -1.8866996  | 1.8866996   |
| TMCC2     | 305095 | 1.1049625   | -1.1049625  |
| TMCC3     | 314751 | -0.9580081  | 0.9580081   |
| TMEM106B  | 312132 | 0.31767172  | -0.31767172 |
| TMEM106C  | 315286 | 1.0677006   | -1.0677006  |
| TMEM107   | 691750 | 1.5588582   | -1.5588582  |
| TMEM141   | 499755 | 1.8384227   | -1.8384227  |
| TMEM150C  | 360916 | 1.5865021   | -1.5865021  |
| TMEM163   | 360839 | -0.7065779  | 0.7065779   |
| TMEM179   | 314472 | 1.2138616   | -1.2138616  |
| TMEM182   | 501129 | -2.9876928  | 2.9876928   |
| TMEM184B  | 362959 | 0.3989972   | -0.3989972  |
| TMEM19    | 299800 | 0.858972    | -0.858972   |
| TMEM200C  | 501201 | 1.0343357   | -1.0343357  |
| TMEM202   | 691306 | -1.2168857  | 1.2168857   |
| TMEM218   | 300516 | 1.4755671   | -1.4755671  |
| TMEM229B  | 503035 | 0.8901293   | -0.8901293  |
| TMEM246   | 362518 | 1.4409344   | -1.4409344  |
| TMEM25    | 689172 | 1.2348101   | -1.2348101  |
| TMEM39A   | 288092 | 0.632154    | -0.632154   |
| TMEM41A   | 681708 | -0.71854585 | 0.71854585  |
| TMEM42    | 363171 | 1.2895105   | -1.2895105  |
| TMEM45A   | 680866 | -2.076463   | 2.076463    |
| TMEM55B   | 364298 | 0.9689839   | -0.9689839  |
| TMEM65    | 500874 | -0.7801371  | 0.7801371   |
| TMEM68    | 312946 | 0.97808397  | -0.97808397 |
| TMEM8A    | 303004 | 0.98735017  | -0.98735017 |
| TMIE      | 501061 | 2.1490898   | -2.1490898  |
| TMOD1     | 25566  | -0.79898345 | 0.79898345  |
| TMPRSS6   | 315388 | -2.1276395  | 2.1276395   |
| TMTC4     | 290501 | 1.451589    | -1.451589   |
| TNFAIP1   | 287543 | 0.38224366  | -0.38224366 |
| TNFRSF11A | 498206 | 0.8378635   | -0.8378635  |
| TNFRSF12A | 302965 | -1.5811874  | 1.5811874   |
| TNFRSF25  | 500592 | -2.0133827  | 2.0133827   |
| TNIP1     | 363599 | 0.5466149   | -0.5466149  |



|          |           |             |             |
|----------|-----------|-------------|-------------|
| TNIP2    | 305451    | -0.9859405  | 0.9859405   |
| TNRC18   | 304302    | 0.62138903  | -0.62138903 |
| TOR1AIP1 | 246314    | -0.38566485 | 0.38566485  |
| TOX3     | 291908    | 1.0046704   | -1.0046704  |
| TP73     | 362675    | -1.8165276  | 1.8165276   |
| TPBG     | 83684     | -1.2230638  | 1.2230638   |
| TPD52L3  | 293894    | 2.1558177   | -2.1558177  |
| TPH1     | 24848     | -1.759721   | 1.759721    |
| TPK1     | 680668    | 1.1043934   | -1.1043934  |
| TPM4     | 24852     | -0.78833544 | 0.78833544  |
| TPPP3    | 291966    | 2.493314    | -2.493314   |
| TRAPPC2B | 100910318 | 1.4842247   | -1.4842247  |
| TRAPPC3  | 362599    | 1.1807364   | -1.1807364  |
| TRERF1   | 316219    | 0.6702241   | -0.6702241  |
| TRIB1    | 78969     | -2.3380017  | 2.3380017   |
| TRIB2    | 313974    | -0.85800225 | 0.85800225  |
| TRIM23   | 81002     | 0.6327717   | -0.6327717  |
| TRIM45   | 295323    | 1.0136446   | -1.0136446  |
| TRIM9    | 155812    | -1.8680766  | 1.8680766   |
| TRIQK    | 500413    | 1.4419904   | -1.4419904  |
| TRMT10C  | 304012    | -0.3914864  | 0.3914864   |
| TRMT6    | 311441    | -0.88919955 | 0.88919955  |
| TRPC1    | 89821     | 0.63926923  | -0.63926923 |
| TRPC4    | 84494     | 1.104643    | -1.104643   |
| TRPC6    | 89823     | -3.409288   | 3.409288    |
| TRPC7    | 282822    | 1.1666611   | -1.1666611  |
| TRPM4    | 171143    | 1.397249    | -1.397249   |
| TRPT1    | 293704    | 1.089093    | -1.089093   |
| TRPV6    | 114246    | 1.3203087   | -1.3203087  |
| TSC22D1  | 498545    | 0.61734474  | -0.61734474 |
| TSPAN17  | 306771    | 1.5900029   | -1.5900029  |
| TSPAN2   | 64521     | 0.8337795   | -0.8337795  |
| TSPAN5   | 362048    | -0.75329566 | 0.75329566  |
| TSPYL1   | 29544     | 0.55921113  | -0.55921113 |
| TTC19    | 691506    | -0.5289188  | 0.5289188   |
| TTC9     | 500689    | -0.55293614 | 0.55293614  |
| TLL1     | 362969    | 1.3057308   | -1.3057308  |
| TTPAL    | 296349    | -1.0306127  | 1.0306127   |
| TUBA8    | 500377    | -1.2659577  | 1.2659577   |
| TUBB4B   | 296554    | 0.42896006  | -0.42896006 |
| TUBG2    | 680991    | 1.3486153   | -1.3486153  |
| TUBGCP3  | 306599    | -0.40801    | 0.40801     |
| TUSC5    | 360576    | -2.4632652  | 2.4632652   |

|           |        |             |             |
|-----------|--------|-------------|-------------|
| TWIST1    | 85489  | -0.961156   | 0.961156    |
| TXNIP     | 117514 | 1.4114915   | -1.4114915  |
| TXNRD1    | 58819  | -0.74920535 | 0.74920535  |
| TYMS      | 29261  | -0.8746929  | 0.8746929   |
| TYR       | 308800 | 2.1056445   | -2.1056445  |
| TYRO3     | 25232  | -0.3947916  | 0.3947916   |
| UAP1      | 498272 | -0.38090712 | 0.38090712  |
| UBASH3B   | 315579 | -2.500164   | 2.500164    |
| UBE2D1    | 361831 | 1.0117896   | -1.0117896  |
| UHRF1BP1L | 363009 | -0.48036596 | 0.48036596  |
| ULK2      | 303206 | 0.4279266   | -0.4279266  |
| UNC119    | 29402  | 1.4818367   | -1.4818367  |
| UNC5B     | 60630  | -2.809945   | 2.809945    |
| UOX       | 114768 | -2.7210045  | 2.7210045   |
| USF1      | 83586  | 0.7900194   | -0.7900194  |
| USO1      | 56042  | -0.34504065 | 0.34504065  |
| USP11     | 408217 | 0.580222    | -0.580222   |
| USP20     | 311856 | 1.0782478   | -1.0782478  |
| USP28     | 315639 | -0.79407537 | 0.79407537  |
| USP46     | 289584 | 0.6767605   | -0.6767605  |
| USP49     | 316211 | 0.6756008   | -0.6756008  |
| UST       | 361450 | -1.3118315  | 1.3118315   |
| UTP15     | 310019 | -0.9198079  | 0.9198079   |
| UTP20     | 314713 | -0.92448187 | 0.92448187  |
| VAC14     | 307842 | 0.91569674  | -0.91569674 |
| VASP      | 361517 | -1.2618965  | 1.2618965   |
| VCL       | 305679 | -1.6796203  | 1.6796203   |
| VEGFA     | 83785  | -1.0660167  | 1.0660167   |
| VGf       | 29461  | -3.8885574  | 3.8885574   |
| VGLL4     | 297523 | -0.45178235 | 0.45178235  |
| VIPR1     | 24875  | -2.1832316  | 2.1832316   |
| VKORC1    | 309004 | 1.4050825   | -1.4050825  |
| VOPP1     | 362374 | 0.8389173   | -0.8389173  |
| VPS25     | 681059 | 0.9774818   | -0.9774818  |
| VPS53     | 287535 | 0.69485587  | -0.69485587 |
| VSTM2B    | 361560 | -0.8955742  | 0.8955742   |
| VWA1      | 298683 | 2.2382662   | -2.2382662  |
| VWA5B2    | 303812 | 1.0999229   | -1.0999229  |
| VWC2      | 501231 | -0.7515774  | 0.7515774   |
| VWC2L     | 501160 | 2.1847382   | -2.1847382  |
| WASH1     | 367328 | 1.4061364   | -1.4061364  |
| WDHD1     | 305827 | -0.54014874 | 0.54014874  |
| WDR1      | 360950 | -0.49472558 | 0.49472558  |

|         |        |             |             |
|---------|--------|-------------|-------------|
| WDR34   | 296618 | 1.4017438   | -1.4017438  |
| WDR43   | 362703 | -0.6477642  | 0.6477642   |
| WDR45   | 302559 | 1.1314515   | -1.1314515  |
| WDR45B  | 360682 | -0.67207795 | 0.67207795  |
| WDR6    | 301007 | 0.90195644  | -0.90195644 |
| WFS1    | 83725  | -0.6478758  | 0.6478758   |
| WIPI2   | 288498 | -0.4373512  | 0.4373512   |
| WISP1   | 65154  | -2.8569026  | 2.8569026   |
| WNT6    | 316526 | -2.9822986  | 2.9822986   |
| WNT7A   | 114850 | 0.54971087  | -0.54971087 |
| WSCD1   | 287466 | -0.6364453  | 0.6364453   |
| WSCD2   | 360824 | 1.4729046   | -1.4729046  |
| XKR4    | 297801 | 0.6514431   | -0.6514431  |
| XKR7    | 311549 | -1.9481895  | 1.9481895   |
| XKR8    | 313033 | -1.112087   | 1.112087    |
| XPO4    | 290280 | -0.98097914 | 0.98097914  |
| XRCC4   | 309995 | 1.1296892   | -1.1296892  |
| YPEL3   | 293491 | 1.6609019   | -1.6609019  |
| YPEL5   | 298792 | 0.9776608   | -0.9776608  |
| ZBTB16  | 353227 | 1.1991673   | -1.1991673  |
| ZBTB22  | 309630 | 0.99966913  | -0.99966913 |
| ZBTB46  | 311718 | -1.4119025  | 1.4119025   |
| ZBTB5   | 298084 | 0.5326453   | -0.5326453  |
| ZBTB9   | 294289 | -0.53306437 | 0.53306437  |
| ZC2HC1A | 310244 | 1.0619466   | -1.0619466  |
| ZC3H18  | 292067 | -0.47602633 | 0.47602633  |
| ZC3H8   | 311414 | 0.7709499   | -0.7709499  |
| ZC4H2   | 367838 | 1.3166186   | -1.3166186  |
| ZDHHC14 | 499014 | -0.5482368  | 0.5482368   |
| ZDHHC20 | 305923 | -0.734937   | 0.734937    |
| ZDHHC5  | 362156 | -0.77307737 | 0.77307737  |
| ZFAND2B | 363253 | 1.1858829   | -1.1858829  |
| ZFAND6  | 293067 | 1.0159383   | -1.0159383  |
| ZFAT    | 362925 | -0.368832   | 0.368832    |
| ZFP217  | 311764 | -2.161255   | 2.161255    |
| ZFP238  | 64619  | 1.1051159   | -1.1051159  |
| ZFP358  | 360754 | 0.9876498   | -0.9876498  |
| ZFP362  | 297879 | 0.492345    | -0.492345   |
| ZFP395  | 305972 | 0.5507338   | -0.5507338  |
| ZFP414  | 299647 | 1.2685622   | -1.2685622  |
| ZFP467  | 500110 | 0.87794447  | -0.87794447 |
| ZFP513  | 313913 | 0.50401187  | -0.50401187 |
| ZFP575  | 308430 | 1.4536451   | -1.4536451  |

|         |           |             |             |
|---------|-----------|-------------|-------------|
| ZFP672  | 303165    | -0.67905396 | 0.67905396  |
| ZFP697  | 295310    | -1.3314832  | 1.3314832   |
| ZFP709  | 266773    | -0.7732385  | 0.7732385   |
| ZFP775  | 312309    | 1.252074    | -1.252074   |
| ZFP786  | 100158223 | 0.84110814  | -0.84110814 |
| ZFP90   | 498945    | 1.1531198   | -1.1531198  |
| ZFPM1   | 691504    | -1.1701488  | 1.1701488   |
| ZFYVE1  | 299188    | 0.5481313   | -0.5481313  |
| ZFYVE19 | 499871    | 1.4545959   | -1.4545959  |
| ZFYVE9  | 313477    | -0.6973551  | 0.6973551   |
| ZGPAT   | 296478    | 0.540302    | -0.540302   |
| ZMIZ1   | 361103    | -1.3804868  | 1.3804868   |
| ZMYND8  | 296374    | 0.6084991   | -0.6084991  |
| ZNRF2   | 362367    | 0.7356772   | -0.7356772  |
| ZPBP2   | 363676    | 0.8807924   | -0.8807924  |
| ZW10    | 363059    | -0.37213176 | 0.37213176  |
| ZYX     | 114636    | -0.7388414  | 0.7388414   |

**Epilepsy-linked V+B v CTRL**

GENE SYMBOL

GALR1

ARC

PLAUR

EGR2

FOSB

GAL

NPTX2

LAMP5

MMP9

EGR4

PRIMA1

EGR1

GRASP

SCG2

ADRA1D

GADD45B

DUSP5

KLF10

KCNA1

SCN1B

DUSP6

HTR1B

EGR3

PTGS2

GFRA1

HTR1F

INHBA

FGF2

NGF

RAG1

SERTAD1

BAG3

RGS4

NRN1

CITED2

THRB

TRIB1

PLCL1

PDP1

FOS

ADRA1B

LAMB3

RGS16

TAC1  
BDNF  
BAIAP2  
HOMER1  
GDNF  
PRICKLE1  
IFRD1  
CREM  
ADRA1A  
CDKN1A  
BHLHE40  
SOCS3  
PNOC  
HAS1  
KCNV1  
TRIM9  
IER2  
SV2C  
SPRY2  
HSPA1A/HSPA1B  
OPRD1  
SLC2A3  
PLK2  
NPY2R  
GADD45G  
SPNS2  
ERRFI1  
JUNB  
GRIN2A  
PTPRN  
DNAJB5  
DUSP2  
POLG  
ADM  
FGF7  
CYR61  
NPY  
SSTR2  
CALCRL  
JUN  
CAMKK1  
KCNB1  
CH25H  
HCN1  
GADD45A

NR4A1  
METRNL  
HTR7  
TYRO3  
DIAPH1  
SPATA5  
ZFP36  
RGS2  
MYC  
GABRQ  
NAMPT  
GFRA2  
SH3GL1  
CACNB4  
ADCYAP1  
LINGO1  
KCNA4  
STAM  
PACSIN1  
PLK3  
MCM6  
FGF22  
GRIN1  
NRG1  
LDLR  
GRIN3B  
PLAT  
GNA11  
ADARB1  
NR4A3  
SIGMAR1  
HES1  
SLC2A1  
HNRNPU  
ARHGEF7  
PPP1R1B  
FYN  
PNKP  
ARHGEF9  
RAPGEF3  
MCL1  
AARS  
KCNK1  
WDR26  
FKBP1A

PMP22  
USF1  
TRIM3  
TWNK  
DEPDC5  
SCLY  
ARRDC3  
ITPR1  
SV2A  
ABHD6  
KCNJ9  
SLC4A10  
STRADB  
FGF13  
STRADA  
PRRT2  
BCL2L11  
SLC37A4  
CRYM  
BAD  
TEF  
DEAF1  
SLITRK3  
NGLY1  
CNR1  
MBNL2  
PNPO  
BEND5  
CXCR4  
NR2F1  
CNNM2  
ST3GAL3  
GABRD  
KCNH3  
BID  
SCN1A  
SCN3B  
ANKRD6  
ST8SIA4  
GABRA1  
AKAP5  
DBP  
BBC3  
NTF3  
KCNMB4



TRPC7  
PSEN2  
PCDH19  
ELAVL4  
SCN2A  
CHRNA5  
LGI1  
CNTN2  
SV2B  
SCN4A  
GABRG2  
OPRK1  
IGSF9  
GRM1  
NEUROD1  
KCNK2

## Epilepsy-linked WP+B and RX2+B reversal gene list

Gene SymID

|          |        |
|----------|--------|
| KCNK2    | 170899 |
| SCN4A    | 25722  |
| IGSF9    | 304982 |
| CYR61    | 83476  |
| PCDH19   | 317183 |
| KCNMB4   | 66016  |
| GABRD    | 29689  |
| GRM1     | 24414  |
| BBC3     | 317673 |
| CRYM     | 117024 |
| ELAVL4   | 432358 |
| CNTN2    | 25356  |
| NTF3     | 81737  |
| BEND5    | 362564 |
| HSPA1A/H | 294254 |
| BAD      | 64639  |
| SCN2A    | 24766  |
| SV2B     | 117556 |
| KCNH3    | 27150  |
| JUNB     | 24517  |
| CHRNA5   | 25102  |
| TRPC7    | 282822 |
| GABRG2   | 29709  |
| LGI1     | 252892 |
| SLC37A4  | 29573  |
| TWNK     | 309441 |
| SCN1A    | 81574  |
| NR2F1    | 81808  |
| NEUROD1  | 29458  |
| ANKRD6   | 500430 |
| FGF13    | 84488  |
| SV2A     | 117559 |
| DBP      | 24309  |
| PRRT2    | 361651 |
| SCN3B    | 245956 |
| BID      | 64625  |
| STRADA   | 303605 |
| CXCR4    | 60628  |
| ST3GAL3  | 64445  |
| USF1     | 83586  |
| PNPO     | 64533  |
| TEF      | 29362  |
| DEPDC5   | 305464 |

|          |        |
|----------|--------|
| CNR1     | 25248  |
| ABHD6    | 305795 |
| CNNM2    | 294014 |
| TYRO3    | 25232  |
| KCNK1    | 59324  |
| RGS2     | 84583  |
| MCL1     | 60430  |
| CAMKK1   | 60341  |
| PMP22    | 24660  |
| SPNS2    | 1E+08  |
| HTR7     | 65032  |
| DIAPH1   | 307483 |
| PACSIN1  | 29704  |
| MYC      | 24577  |
| DNAJB5   | 313811 |
| ADM      | 25026  |
| PLK2     | 83722  |
| PTPRN    | 116660 |
| IFRD1    | 29596  |
| KCNB1    | 25736  |
| GABRQ    | 65187  |
| SSTR2    | 54305  |
| HCN1     | 84390  |
| POLG     | 85472  |
| NAMPT    | 297508 |
| ERRFI1   | 313729 |
| METRNL   | 316842 |
| KCNV1    | 60326  |
| KCNA4    | 25469  |
| TAC1     | 24806  |
| CH25H    | 309527 |
| CALCRL   | 25029  |
| CACNB4   | 58942  |
| EGR2     | 114090 |
| NPY2R    | 66024  |
| CREM     | 25620  |
| RGS4     | 29480  |
| GADD45B  | 299626 |
| PRICKLE1 | 315259 |
| BDNF     | 24225  |
| SLC2A3   | 25551  |
| SERTAD1  | 361526 |
| CITED2   | 114490 |
| SPRY2    | 306141 |
| LAMB3    | 305078 |

|         |        |
|---------|--------|
| BAIAP2  | 117542 |
| DUSP6   | 116663 |
| SOCS3   | 89829  |
| ADRA1B  | 24173  |
| HOMER1  | 29546  |
| NGF     | 310738 |
| TRIM9   | 155812 |
| GDNF    | 25453  |
| THRB    | 24831  |
| PDP1    | 54705  |
| RGS16   | 360857 |
| SCN1B   | 29686  |
| PLCL1   | 84587  |
| BHLHE40 | 79431  |
| NRN1    | 83834  |
| PTGS2   | 29527  |
| TRIB1   | 78969  |
| INHBA   | 29200  |
| DUSP5   | 171109 |
| KLF10   | 81813  |
| ADRA1D  | 29413  |
| GFRA1   | 25454  |
| EGR3    | 25148  |
| SCG2    | 24765  |
| HAS1    | 282821 |
| LAMP5   | 362220 |
| BAG3    | 293524 |
| GRASP   | 192254 |
| KCNA1   | 24520  |
| GAL     | 29141  |
| HTR1F   | 60448  |
| HTR1B   | 25075  |
| GRIN2A  | 24409  |
| SV2C    | 29643  |
| NPTX2   | 288475 |
| ADRA1A  | 29412  |
| ARC     | 54323  |
| FGF2    | 54250  |
| PLAUR   | 50692  |
| GALR1   | 50577  |

## Top WP+B and RX2+B in network by category

| Synaptic Plasticity Group | Entrez ID |
|---------------------------|-----------|
| ADCY8                     | 29241     |
| ADORA1                    | 29290     |
| ADORA2A                   | 25369     |
| ARC                       | 54323     |
| BAIAP2                    | 117542    |
| BDNF                      | 24225     |
| CACNB4                    | 58942     |
| CDK5                      | 140908    |
| CNR1                      | 25248     |
| CNTN2                     | 25356     |
| CREM                      | 25620     |
| DRD5                      | 25195     |
| EFNA4                     | 310643    |
| EFNB3                     | 360546    |
| EGR2                      | 114090    |
| EGR3                      | 25148     |
| ERCC1                     | 292673    |
| GRIN2A                    | 24409     |
| GRIP1                     | 84016     |
| GRM1                      | 24414     |
| HOMER1                    | 29546     |
| HRH1                      | 24448     |
| IGF1                      | 24482     |
| INHBA                     | 29200     |
| JPH3                      | 307916    |
| JPH4                      | 445271    |
| JUNB                      | 24517     |
| KCNH3                     | 27150     |
| KLF9                      | 117560    |
| KLF10                     | 81813     |
| KRAS                      | 24525     |
| LZTS1                     | 266711    |
| NGF                       | 310738    |
| NPTX2                     | 288475    |
| NTF3                      | 81737     |
| NTRK3                     | 29613     |
| PCDH8                     | 64865     |
| PLK2                      | 83722     |
| PPP1CA                    | 24668     |
| PRKAR2A                   | 29699     |

|         |        |
|---------|--------|
| RAB3A   | 25531  |
| RASGRF1 | 192213 |
| RGS2    | 84583  |
| SNCA    | 29219  |
| SYNPO   | 60324  |
| TIMP1   | 116510 |
| VGFB    | 29461  |

| <b>Receptors and ion channels group</b> | <b>Entrez ID</b> |
|-----------------------------------------|------------------|
| ADGRB1                                  | 362931           |
| ADGRB3                                  | 301309           |
| ADGRE5                                  | 361383           |
| ADORA1                                  | 29290            |
| ADORA2A                                 | 25369            |
| ADRA1A                                  | 29412            |
| ADRA1B                                  | 24173            |
| ADRA1D                                  | 29413            |
| AGTR1                                   | 24180            |
| ANO1                                    | 309135           |
| CACNB3                                  | 25297            |
| CALCRL                                  | 25029            |
| CCKAR                                   | 24889            |
| CCKBR                                   | 25706            |
| CHRNA5                                  | 25102            |
| CNR1                                    | 25248            |
| DRD5                                    | 25195            |
| EDNRA                                   | 24326            |
| F2R                                     | 25439            |
| FFAR4                                   | 294075           |
| FZD1                                    | 58868            |
| FZD4                                    | 64558            |
| GABARAPL1                               | 689161           |
| GABRD                                   | 29689            |
| GABRG2                                  | 29709            |
| GABRQ                                   | 65187            |
| GALR1                                   | 50577            |
| GCGR                                    | 24953            |
| GPR3                                    | 266769           |
| GPR4                                    | 308408           |
| GPR12                                   | 80840            |
| GPR26                                   | 192153           |
| GPR37                                   | 117549           |
| GPR45                                   | 301372           |

|        |        |
|--------|--------|
| GPR50  | 117097 |
| GPR61  | 310780 |
| GPR63  | 297952 |
| GPR68  | 314386 |
| GPR83  | 140595 |
| GPR85  | 64020  |
| GPR88  | 64443  |
| GPR101 | 317608 |
| GPR139 | 293545 |
| GPR156 | 260430 |
| GPR158 | 291352 |
| GPRC5A | 312790 |
| GPRC5C | 287805 |
| GRIN2A | 24409  |
| GRIP1  | 84016  |
| GRM1   | 24414  |
| GRM6   | 24419  |
| HCN1   | 84390  |
| HCN3   | 114245 |
| HRH1   | 24448  |
| HRH3   | 85268  |
| HTR7   | 65032  |
| HTR1B  | 25075  |
| HTR1F  | 60448  |
| KCNA1  | 24520  |
| KCNA4  | 25469  |
| KCNB1  | 25736  |
| KCNC4  | 684516 |
| KCND2  | 65180  |
| KCNE2  | 171138 |
| KCNF1  | 298908 |
| KCNH3  | 27150  |
| KCNH4  | 114032 |
| KCNJ4  | 116649 |
| KCNJ5  | 29713  |
| KCNJ12 | 117052 |
| KCNK1  | 59324  |
| KCNK2  | 170899 |
| KCNK3  | 29553  |
| KCNMB2 | 294961 |
| KCNMB4 | 66016  |
| KCNN1  | 54261  |
| KCNN3  | 54263  |

|        |        |
|--------|--------|
| KCNV1  | 60326  |
| KCTD6  | 305792 |
| KCTD15 | 499129 |
| LPAR1  | 116744 |
| MAS1   | 25153  |
| MC5R   | 25726  |
| MCHR1  | 83567  |
| NMBR   | 25264  |
| NPY1R  | 29358  |
| NPY2R  | 66024  |
| OPRL1  | 29256  |
| OXTR   | 25342  |
| P2RY1  | 25265  |
| P2RY14 | 171108 |
| PTAFR  | 58949  |
| PTGER4 | 84023  |
| RXFP3  | 294807 |
| SCN1A  | 81574  |
| SCN1B  | 29686  |
| SCN2A  | 24766  |
| SCN3B  | 245956 |
| SCN4A  | 25722  |
| SCNN1G | 24768  |
| SSTR2  | 54305  |
| SSTR3  | 171044 |
| SSTR4  | 25555  |
| TACR2  | 25007  |
| TACR3  | 24808  |
| TAS1R3 | 170634 |
| VIPR1  | 24875  |

**Proliferation Group**

**Entrez ID**

|          |        |
|----------|--------|
| AATK     | 690853 |
| ADCY7    | 84420  |
| ADCY8    | 29241  |
| ADORA2A  | 25369  |
| AKT2     | 25233  |
| ANKRD6   | 500430 |
| APBA2    | 83610  |
| APBB1    | 29722  |
| ARHGAP17 | 63994  |
| ARHGEF25 | 314904 |
| BAIAP2   | 117542 |



|         |        |
|---------|--------|
| BDNF    | 24225  |
| CABLES1 | 307585 |
| CACNB3  | 25297  |
| CACNB4  | 58942  |
| CAMKK1  | 60341  |
| CAT     | 24248  |
| CAV1    | 25404  |
| CCND1   | 58919  |
| CDH7    | 29162  |
| CDH15   | 361432 |
| CDK5    | 140908 |
| CFLAR   | 117279 |
| CLASP2  | 114514 |
| CNP     | 25275  |
| CNR1    | 25248  |
| CNTN2   | 25356  |
| COL4A1  | 290905 |
| COL5A1  | 85490  |
| CSPG5   | 50568  |
| CX3CL1  | 89808  |
| CXCR4   | 60628  |
| DISC1   | 307940 |
| DLC1    | 58834  |
| DOK4    | 361364 |
| DOK5    | 502694 |
| DPYSL2  | 25416  |
| EEA1    | 314764 |
| EFNB3   | 360546 |
| EGR3    | 25148  |
| EIF5A   | 287444 |
| ELAVL4  | 432358 |
| EML1    | 362783 |
| ESR1    | 24890  |
| ETV4    | 360635 |
| ETV5    | 303828 |
| EXOC5   | 60627  |
| EZR     | 54319  |
| FEZ1    | 81730  |
| FGF2    | 54250  |
| FGF3    | 170633 |
| FGF8    | 29349  |
| FGF9    | 25444  |
| FGF13   | 84488  |

|         |           |
|---------|-----------|
| FGFR1   | 79114     |
| FKBP5   | 361810    |
| FZR1    | 314642    |
| GAL     | 29141     |
| GAS7    | 85246     |
| GDNF    | 25453     |
| GFRA1   | 25454     |
| GPM6A   | 306439    |
| GPR3    | 266769    |
| GPR12   | 80840     |
| GRASP   | 192254    |
| GRK5    | 59075     |
| GRN     | 29143     |
| IFNG    | 25712     |
| IGF1    | 24482     |
| IGSF9   | 304982    |
| IL6R    | 24499     |
| IRS2    | 29376     |
| IRX6    | 307715    |
| ITGA6   | 114517    |
| JAK1    | 84598     |
| JAK2    | 24514     |
| KCNA1   | 24520     |
| KITLG   | 60427     |
| KL      | 83504     |
| KRAS    | 24525     |
| LGI1    | 252892    |
| LPAR1   | 116744    |
| MAFK    | 246760    |
| MAML3   | 310405    |
| MAP2K3  | 303200    |
| MAP2K4  | 287398    |
| MAP2K5  | 29568     |
| MAP2K6  | 114495    |
| MAPK3   | 50689     |
| MAPK15  | 286997    |
| MAR8    | 312656    |
| MFN1    | 192647    |
| MUSK    | 81725     |
| NEUROD4 | 288821    |
| NFATC1  | 100361818 |
| NGB     | 85382     |
| NGF     | 310738    |

|         |        |
|---------|--------|
| NOG     | 25495  |
| NPTX1   | 266777 |
| NR1D1   | 252917 |
| NRF1    | 312195 |
| NRN1    | 83834  |
| NTF3    | 81737  |
| NTRK3   | 29613  |
| PAK5    | 311450 |
| PAK6    | 296078 |
| PDGFB   | 24628  |
| PDP1    | 54705  |
| PIK3C3  | 65052  |
| PIK3CB  | 85243  |
| PIK3CD  | 366508 |
| PJA2    | 192256 |
| PLAGL1  | 25157  |
| PLCL1   | 84587  |
| PLPPR4  | 295401 |
| POLR3E  | 361640 |
| POU4F2  | 171355 |
| POU4F3  | 364855 |
| PRAG1   | 306506 |
| PRKAA1  | 65248  |
| PRKAR2A | 29699  |
| PRKCQ   | 85420  |
| PRKCZ   | 25522  |
| PTPDC1  | 291022 |
| PXN     | 360820 |
| RAB33A  | 317580 |
| RALGDS  | 29622  |
| RAP1B   | 171337 |
| RASA1   | 25676  |
| RASGRF1 | 192213 |
| RET     | 24716  |
| RHOQ    | 85428  |
| RHOV    | 171581 |
| RIT1    | 499652 |
| RIT2    | 291713 |
| RND1    | 362993 |
| ROCK2   | 25537  |
| RTN4RL2 | 311169 |
| RXRB    | 361801 |
| RXRG    | 83574  |

|           |        |
|-----------|--------|
| SCN1B     | 29686  |
| SDC1      | 25216  |
| SEMA3A    | 29751  |
| SEMA3D    | 246262 |
| SH2D3C    | 362111 |
| SMARCD3   | 296732 |
| SOCS3     | 89829  |
| SPAST     | 362700 |
| SPRR1A    | 499660 |
| SPRY2     | 306141 |
| SS18      | 361295 |
| SSTR3     | 171044 |
| SYK       | 25155  |
| TGFB1     | 59086  |
| TGFBR2    | 81810  |
| TNFRSF12A | 302965 |
| TP73      | 362675 |
| Tpm4      | 24852  |
| TRPC1     | 89821  |
| TWIST1    | 85489  |
| VCL       | 305679 |
| VEGFA     | 83785  |
| VEGF      | 29461  |
| ZBTB18    | 64619  |

**Neurogenesis group**

**Entrez ID**

|         |        |
|---------|--------|
| AATK    | 690853 |
| ABI1    | 79249  |
| ACSL4   | 113976 |
| ACVR1   | 79558  |
| ADAP1   | 171097 |
| ADCY7   | 84420  |
| ADCY8   | 29241  |
| ADGRB1  | 362931 |
| ADGRB3  | 301309 |
| ADGRE5  | 361383 |
| ADM     | 25026  |
| ADORA2A | 25369  |
| AIPL1   | 59110  |
| AKT2    | 25233  |
| ANAPC2  | 296558 |
| ANKRD6  | 500430 |
| APBA2   | 83610  |

|          |        |
|----------|--------|
| APBB1    | 29722  |
| ARC      | 54323  |
| AREG     | 29183  |
| ARHGAP17 | 63994  |
| ARHGEF25 | 314904 |
| ARHGEF28 | 361882 |
| ARPP21   | 363153 |
| BAIAP2   | 117542 |
| BDNF     | 24225  |
| BHLHE22  | 365748 |
| BHLHE23  | 499952 |
| BID      | 64625  |
| BLOC1S6  | 317630 |
| BRINP3   | 286901 |
| CABLES1  | 307585 |
| CACNB3   | 25297  |
| CACNB4   | 58942  |
| CAMK1G   | 171358 |
| CAMKK1   | 60341  |
| CAT      | 24248  |
| CAV1     | 25404  |
| CBLN1    | 498922 |
| CBLN2    | 291388 |
| CCKAR    | 24889  |
| CCND1    | 58919  |
| CDH7     | 29162  |
| CDH15    | 361432 |
| CDK5     | 140908 |
| CDK5RAP1 | 252827 |
| CDK5RAP3 | 80278  |
| CFLAR    | 117279 |
| Chrm2    | 81645  |
| CLASP2   | 114514 |
| CLN8     | 306619 |
| CNP      | 25275  |
| CNR1     | 25248  |
| CNTFR    | 313173 |
| CNTN2    | 25356  |
| COL4A1   | 290905 |
| COL5A1   | 85490  |
| CREM     | 25620  |
| CSPG5    | 50568  |
| CTSF     | 361704 |

|         |        |
|---------|--------|
| CUX2    | 288665 |
| CX3CL1  | 89808  |
| CXCR4   | 60628  |
| CYP26B1 | 312495 |
| CYR61   | 83476  |
| DDIT4   | 140942 |
| DIAPH1  | 307483 |
| DISC1   | 307940 |
| DLC1    | 58834  |
| DLG1    | 25252  |
| DLK1    | 114587 |
| DOK4    | 361364 |
| DOK5    | 502694 |
| DPYSL2  | 25416  |
| EBF1    | 116543 |
| EBF3    | 361668 |
| ECEL1   | 60417  |
| EDNRA   | 24326  |
| EEA1    | 314764 |
| EEF2K   | 25435  |
| EFNA4   | 310643 |
| EFNB3   | 360546 |
| EGR2    | 114090 |
| EGR3    | 25148  |
| EHD1    | 293692 |
| EIF5A   | 287444 |
| ELAVL4  | 432358 |
| EML1    | 362783 |
| EPHA3   | 29210  |
| EPHA4   | 316539 |
| EPHB6   | 312275 |
| ESR1    | 24890  |
| ETV4    | 360635 |
| ETV5    | 303828 |
| EXOC5   | 60627  |
| EZR     | 54319  |
| F2R     | 25439  |
| FAIM2   | 246274 |
| FBXO31  | 498959 |
| FEZ1    | 81730  |
| FGF2    | 54250  |
| FGF3    | 170633 |
| FGF8    | 29349  |

|               |        |
|---------------|--------|
| FGF9          | 25444  |
| FGF13         | 84488  |
| FGFR1         | 79114  |
| FIG4          | 309855 |
| FKBP5         | 361810 |
| FLOT1         | 64665  |
| FLRT1         | 499308 |
| FOXP2         | 500037 |
| FST           | 24373  |
| FZR1          | 314642 |
| GABRG2        | 29709  |
| GAL           | 29141  |
| GAS7          | 85246  |
| GBX1          | 246149 |
| GDNF          | 25453  |
| GEM           | 297902 |
| GFRA1         | 25454  |
| GLDN          | 315675 |
| GLI2          | 304729 |
| GPC2          | 171517 |
| GPM6A         | 306439 |
| GPR3          | 266769 |
| GPR12         | 80840  |
| GRASP         | 192254 |
| GRIN2A        | 24409  |
| GRIP1         | 84016  |
| GRK5          | 59075  |
| GRM1          | 24414  |
| GRM6          | 24419  |
| GRN           | 29143  |
| GUCY1A3       | 497757 |
| HCN1          | 84390  |
| HMG20A        | 315689 |
| HOMER1        | 29546  |
| HOMER2        | 29547  |
| HSPA1A/HSPA1B | 294254 |
| HTR7          | 65032  |
| HTR1B         | 25075  |
| IFNG          | 25712  |
| IFT122        | 312651 |
| IGF1          | 24482  |
| IGSF9         | 304982 |
| IL1RAP        | 25466  |

|         |        |
|---------|--------|
| IL6R    | 24499  |
| INHBA   | 29200  |
| IRS2    | 29376  |
| IRX6    | 307715 |
| ITGA6   | 114517 |
| ITM2C   | 301575 |
| ITSN1   | 29491  |
| JAK1    | 84598  |
| JAK2    | 24514  |
| JUNB    | 24517  |
| KCNA1   | 24520  |
| KCND2   | 65180  |
| KDM1A   | 500569 |
| KDM4A   | 313539 |
| KITLG   | 60427  |
| KL      | 83504  |
| KLF9    | 117560 |
| KRAS    | 24525  |
| LCK     | 313050 |
| LDB1    | 309447 |
| LEF1    | 161452 |
| LG11    | 252892 |
| LHX2    | 296706 |
| LHX4    | 360858 |
| LIMK2   | 29524  |
| LMNA    | 60374  |
| LMO4    | 362051 |
| LPAR1   | 116744 |
| LRRC4   | 641521 |
| LRRN1   | 500280 |
| LRRN3   | 81514  |
| LRRTM3  | 294380 |
| LRTM2   | 680883 |
| LZTS1   | 266711 |
| MAFK    | 246760 |
| MAML3   | 310405 |
| MAN2A1  | 25478  |
| MAP2K3  | 303200 |
| MAP2K4  | 287398 |
| MAP2K5  | 29568  |
| MAP2K6  | 114495 |
| MAP3K12 | 25579  |
| MAPK3   | 50689  |



|         |           |
|---------|-----------|
| MAPK15  | 286997    |
| MAR8    | 312656    |
| MCOLN3  | 308022    |
| MFN1    | 192647    |
| MINK1   | 303259    |
| MMP3    | 171045    |
| MUSK    | 81725     |
| MYC     | 24577     |
| MYT1L   | 116668    |
| NAMPT   | 297508    |
| NAPEPLD | 296757    |
| NCOR2   | 360801    |
| NCSTN   | 289231    |
| NECTIN1 | 192183    |
| NEFL    | 83613     |
| NEUROD1 | 29458     |
| NEUROD2 | 54276     |
| NEUROD4 | 288821    |
| NFATC1  | 100361818 |
| NFIB    | 29227     |
| NGB     | 85382     |
| NGF     | 310738    |
| NOG     | 25495     |
| NOTCH4  | 406162    |
| NPTX1   | 266777    |
| NPY1R   | 29358     |
| NPY2R   | 66024     |
| NR1D1   | 252917    |
| NR2F1   | 81808     |
| NRF1    | 312195    |
| NRN1    | 83834     |
| NTF3    | 81737     |
| NTRK3   | 29613     |
| NUAK1   | 299694    |
| NYAP1   | 304376    |
| OLIG2   | 304103    |
| OXTR    | 25342     |
| P2RX2   | 114115    |
| PACSIN1 | 29704     |
| PAK5    | 311450    |
| PAK6    | 296078    |
| PANX1   | 315435    |
| PARD6A  | 307799    |

|         |        |
|---------|--------|
| PBX1    | 304947 |
| PCDH8   | 64865  |
| PDGFB   | 24628  |
| PDP1    | 54705  |
| PECAM1  | 29583  |
| PHACTR3 | 362284 |
| PIEZO1  | 361430 |
| PIK3C3  | 65052  |
| PIK3CB  | 85243  |
| PIK3CD  | 366508 |
| PJA2    | 192256 |
| PLAGL1  | 25157  |
| PLAUR   | 50692  |
| PLCL1   | 84587  |
| PLPPR4  | 295401 |
| PLXNA2  | 289392 |
| PLXND1  | 312652 |
| PMP22   | 24660  |
| POLR3E  | 361640 |
| POU4F2  | 171355 |
| POU4F3  | 364855 |
| PPP3CC  | 171378 |
| PRAG1   | 306506 |
| PRKAA1  | 65248  |
| PRKAR2A | 29699  |
| PRKCQ   | 85420  |
| PRKCZ   | 25522  |
| PRSS12  | 85266  |
| PRUNE1  | 310664 |
| PSENN   | 292788 |
| PTGS2   | 29527  |
| PTPDC1  | 291022 |
| PTPRE   | 114767 |
| PXN     | 360820 |
| RAB11B  | 79434  |
| RAB33A  | 317580 |
| RAB3A   | 25531  |
| RALGDS  | 29622  |
| RAP1B   | 171337 |
| RASA1   | 25676  |
| RASGRF1 | 192213 |
| REEP1   | 362384 |
| REM2    | 64626  |

|         |        |
|---------|--------|
| RET     | 24716  |
| RGS2    | 84583  |
| RGS14   | 114705 |
| RHOQ    | 85428  |
| RHOV    | 171581 |
| RIT1    | 499652 |
| RIT2    | 291713 |
| RND1    | 362993 |
| ROCK2   | 25537  |
| RPS6KA3 | 501560 |
| RPS6KB1 | 83840  |
| RTN4RL1 | 303311 |
| RTN4RL2 | 311169 |
| RUNX1   | 50662  |
| RXRB    | 361801 |
| RXRG    | 83574  |
| RYK     | 140585 |
| SCN1A   | 81574  |
| SCN1B   | 29686  |
| SDC1    | 25216  |
| SDCBP   | 83841  |
| SDK2    | 360652 |
| SEMA3A  | 29751  |
| SEMA3D  | 246262 |
| SEMA3E  | 296789 |
| SH2D3C  | 362111 |
| SHTN1   | 292139 |
| SLC17A6 | 84487  |
| SLC18A2 | 25549  |
| SLC5A3  | 114507 |
| SLC6A15 | 282712 |
| SLITRK4 | 302473 |
| SMAD3   | 25631  |
| SMARCD3 | 296732 |
| SNCA    | 29219  |
| SOCS3   | 89829  |
| SORBS2  | 114901 |
| SOX4    | 364712 |
| SPAST   | 362700 |
| SPHK1   | 170897 |
| SPRR1A  | 499660 |
| SPRY2   | 306141 |
| SS18    | 361295 |

|           |        |
|-----------|--------|
| SSTR3     | 171044 |
| SUN1      | 360773 |
| SV2A      | 117559 |
| SYK       | 25155  |
| TAC1      | 24806  |
| TACC1     | 306562 |
| TCTN1     | 304486 |
| TGFB1     | 59086  |
| TGFBR2    | 81810  |
| TGIF1     | 316742 |
| THRB      | 24831  |
| TMEM106B  | 312132 |
| TNFRSF12A | 302965 |
| TP73      | 362675 |
| TPBG      | 83684  |
| Tpm4      | 24852  |
| TRIM9     | 155812 |
| TRPC1     | 89821  |
| TRPC6     | 89823  |
| TWIST1    | 85489  |
| TYRO3     | 25232  |
| ULK2      | 303206 |
| UST       | 361450 |
| VASP      | 361517 |
| VCL       | 305679 |
| VEGFA     | 83785  |
| VGf       | 29461  |
| VWC2      | 501231 |
| WNT6      | 316526 |
| WNT7A     | 114850 |
| XRCC4     | 309995 |
| ZBTB18    | 64619  |

**Transcription factors group**

**Entrez ID**

|          |        |
|----------|--------|
| ABTB1    | 297432 |
| ANAPC2   | 296558 |
| ANKRD5   | 296184 |
| ANKRD6   | 500430 |
| APBB1    | 29722  |
| ARC      | 54323  |
| ARHGEF25 | 314904 |
| ARID5A   | 316327 |
| ASCC1    | 294512 |

|          |        |
|----------|--------|
| ASCC2    | 498402 |
| ASCC3    | 309887 |
| ATF1     | 315305 |
| ATMIN    | 315037 |
| BACH1    | 304127 |
| BANP     | 292064 |
| BAZ1A    | 314126 |
| BBX      | 303970 |
| BCL11A   | 305589 |
| BCOR     | 317346 |
| BHLHE22  | 365748 |
| BHLHE23  | 499952 |
| BHLHE40  | 79431  |
| BTBD6    | 690367 |
| CALCOCO1 | 246047 |
| CARF     | 301446 |
| CBFA2T3  | 361431 |
| CBFB     | 361391 |
| CBX8     | 303731 |
| CCRN4L   | 310395 |
| CDK5     | 140908 |
| CHD1     | 308215 |
| CHD6     | 311607 |
| CHRAC1   | 315058 |
| CHURC1   | 299154 |
| CIR1     | 362149 |
| CITED2   | 114490 |
| CREBL2   | 362453 |
| CREM     | 25620  |
| CRIP2    | 338401 |
| CRY1     | 299691 |
| CSRNP1   | 363165 |
| CSRP2    | 29317  |
| CTDP1    | 291414 |
| CUX2     | 288665 |
| DBP      | 24309  |
| DDX20    | 84473  |
| DDX3X    | 317335 |
| DEAF1    | 83632  |
| DEPDC5   | 305464 |
| DHX57    | 366532 |
| DIP2C    | 307067 |
| DOT1L    | 362831 |

|          |        |
|----------|--------|
| DPF1     | 50545  |
| DPF3     | 299186 |
| EBF1     | 116543 |
| EBF3     | 361668 |
| EEA1     | 314764 |
| EGR2     | 114090 |
| EGR3     | 25148  |
| EHF      | 295965 |
| ELF3     | 304815 |
| ELP2     | 307545 |
| ESR1     | 24890  |
| ETV4     | 360635 |
| ETV5     | 303828 |
| FBXO41   | 312504 |
| FHL2     | 63839  |
| FOXP2    | 500037 |
| GAS7     | 85246  |
| GBX1     | 246149 |
| GLI2     | 304729 |
| GRHL2    | 299979 |
| GRM6     | 24419  |
| GTF2IRD1 | 246770 |
| GTF3C5   | 362095 |
| GZF1     | 311508 |
| HDAC11   | 297453 |
| HES6     | 316626 |
| HIC1     | 303310 |
| HMG20A   | 315689 |
| HMGA1    | 117062 |
| HMGA2    | 84017  |
| HP1BP3   | 313647 |
| HPCAL1   | 50871  |
| HSF2BP   | 499413 |
| ING4     | 297597 |
| IQSEC3   | 404781 |
| IRF6     | 364081 |
| IRX6     | 307715 |
| JAK2     | 24514  |
| JUNB     | 24517  |
| KDM1A    | 500569 |
| KDM4A    | 313539 |
| KLF10    | 81813  |
| KLF11    | 313994 |

|             |        |
|-------------|--------|
| KLF13       | 499171 |
| KLF14       | 312203 |
| KLF2        | 306330 |
| KLF5        | 84410  |
| KLF7        | 363243 |
| KLF9        | 117560 |
| KLHL14      | 364823 |
| KLHL25      | 293023 |
| KLHL36      | 498957 |
| KLHL5       | 305351 |
| LDB1        | 309447 |
| LEF1        | 161452 |
| LHX2        | 296706 |
| LHX4        | 360858 |
| LMO1///LMO3 | 245979 |
| LMO2        | 362176 |
| LMO4        | 362051 |
| LZTFL1      | 316102 |
| LZTS1       | 266711 |
| MAF1        | 315093 |
| MAFK        | 246760 |
| MAML3       | 310405 |
| MAPK3       | 50689  |
| MCM5        | 291885 |
| MED15       | 360743 |
| MED4        | 306030 |
| MEIS2       | 311311 |
| MINK1       | 303259 |
| MKRN1       | 296988 |
| MLL5        | 311968 |
| MLLT3       | 114510 |
| MMS19       | 171124 |
| MNT         | 287521 |
| MRRF        | 311903 |
| MTERFD3     | 366856 |
| MXD4        | 360961 |
| MXI1        | 25701  |
| MYC         | 24577  |
| MYCL1       | 298506 |
| MYT1L       | 116668 |
| NAB2        | 314910 |
| NAP1L3      | 170914 |
| NCALD       | 553106 |

|         |           |
|---------|-----------|
| NCOR2   | 360801    |
| NEUROD1 | 29458     |
| NEUROD2 | 54276     |
| NEUROD4 | 288821    |
| NFATC1  | 100361818 |
| NFIB    | 29227     |
| NFKBIE  | 316241    |
| NFRKB   | 315523    |
| NFX1    | 313166    |
| NHLH2   | 295327    |
| NOC3L   | 361753    |
| NOP2    | 314969    |
| NOTCH4  | 406162    |
| NR1D1   | 252917    |
| NR1D2   | 259241    |
| NR1I3   | 65035     |
| NR2F1   | 81808     |
| NRF1    | 312195    |
| NRIP1   | 304157    |
| NRIP3   | 361625    |
| OLIG2   | 304103    |
| PAPOLA  | 314417    |
| PAX1    | 311505    |
| PBX1    | 304947    |
| PCBP4   | 363133    |
| PCGF2   | 287662    |
| PEX14   | 64460     |
| PHF14   | 500030    |
| PHF20   | 311575    |
| PITX1   | 113983    |
| PKNOX1  | 294322    |
| PKNOX2  | 680549    |
| PLAGL1  | 25157     |
| PLXNA2  | 289392    |
| PLXND1  | 312652    |
| PNRC1   | 286988    |
| POLE4   | 362385    |
| POLR1A  | 83581     |
| POLR3E  | 361640    |
| POU4F2  | 171355    |
| POU4F3  | 364855    |
| POU6F1  | 116545    |
| PPRC1   | 294007    |



|            |        |
|------------|--------|
| PTBP1      | 29497  |
| PURG       | 361162 |
| RAD21      | 314949 |
| RAI14      | 294804 |
| RBAK       | 288489 |
| RBPMS      | 498642 |
| RFXAP      | 499617 |
| RGD1563666 | 317617 |
| RGS14      | 114705 |
| ROCK2      | 25537  |
| RPS6KA5    | 314384 |
| RUNX1      | 50662  |
| RUNX1T1    | 362489 |
| RUNX2      | 367218 |
| RXRB       | 361801 |
| RXRG       | 83574  |
| RYBP       | 312603 |
| SAP30BP    | 360662 |
| SATB1      | 316164 |
| SCRT2      | 366229 |
| SERTAD1    | 361526 |
| SFMBT1     | 58967  |
| SIM1       | 309888 |
| SIN3A      | 363067 |
| SIRT3      | 293615 |
| SIRT5      | 306840 |
| SMAD3      | 25631  |
| SMARCA2    | 361745 |
| SMARCD3    | 296732 |
| SMYD5      | 312503 |
| SORBS2     | 114901 |
| SOX4       | 364712 |
| SP7        | 300260 |
| SRSF9      | 288701 |
| ST18       | 266680 |
| TADA2B     | 289717 |
| TAF12      | 682902 |
| TBX21      | 303496 |
| TCEAL1     | 302593 |
| TEAD1      | 361630 |
| TEF        | 29362  |
| TFAP4      | 360482 |
| TGFB1      | 59086  |

|                |           |
|----------------|-----------|
| TGIF1          | 316742    |
| THRB           | 24831     |
| TOX3           | 291908    |
| TP73           | 362675    |
| TRERF1         | 316219    |
| TRIM23         | 81002     |
| TRIM9          | 155812    |
| TSC22D1        | 498545    |
| TWIST1         | 85489     |
| TXNIP          | 117514    |
| USF1           | 83586     |
| VGLL4          | 297523    |
| VPS25          | 681059    |
| WDHD1          | 305827    |
| WDR45L         | 360682    |
| ZBTB16         | 353227    |
| ZBTB22         | 309630    |
| ZBTB46         | 311718    |
| ZBTB5          | 298084    |
| ZBTB9          | 294289    |
| ZC3H18         | 292067    |
| ZC3H8          | 311414    |
| ZFA///ZFAT     | 362925    |
| ZFAND6         | 293067    |
| ZFP62          | 361500    |
| ZFPM1          | 691504    |
| ZGPAT          | 296478    |
| ZMIZ1          | 361103    |
| ZMYND8         | 296374    |
| ZNF217         | 311764    |
| ZNF238         | 64619     |
| ZNF358         | 360754    |
| ZNF395         | 305972    |
| ZNF414         | 299647    |
| ZNF467         | 500110    |
| ZNF513         | 313913    |
| ZNF575         | 308430    |
| ZNF672         | 303165    |
| ZNF697         | 295310    |
| ZNF709///ZNF14 | 266773    |
| ZNF775         | 312309    |
| ZNF786         | 100158223 |
| ZNF90///ZFP90  | 498945    |

ZYX 114636

| <b>Epilepsy Group</b> | <b>Entrez ID</b> |
|-----------------------|------------------|
| ABHD6                 | 305795           |
| ADM                   | 25026            |
| ADRA1A                | 29412            |
| ADRA1B                | 24173            |
| ADRA1D                | 29413            |
| ANKRD6                | 500430           |
| ARC                   | 54323            |
| BAG3                  | 293524           |
| BAIAP2                | 117542           |
| BBC3                  | 317673           |
| BDNF                  | 24225            |
| BEND5                 | 362564           |
| CACNB4                | 58942            |
| CALCRL                | 25029            |
| CAMKK1                | 60341            |
| CH25H                 | 309527           |
| CITED2                | 114490           |
| CNTN2                 | 25356            |
| CREM                  | 25620            |
| CRYM                  | 117024           |
| CXCR4                 | 60628            |
| CYR61                 | 83476            |
| DBP                   | 24309            |
| DEPDC5                | 305464           |
| DNAJB5                | 313811           |
| DUSP5                 | 171109           |
| DUSP6                 | 116663           |
| EGR2                  | 114090           |
| EGR3                  | 25148            |
| ERRF1                 | 313729           |
| FGF13                 | 84488            |
| GABRD                 | 29689            |
| GABRG2                | 29709            |
| GABRQ                 | 65187            |
| GADD45B               | 299626           |
| GAL                   | 29141            |
| GFRA1                 | 25454            |
| GRASP                 | 192254           |
| GRIN2A                | 24409            |
| HAS1                  | 282821           |

|               |           |
|---------------|-----------|
| HCN1          | 84390     |
| HOMER1        | 29546     |
| HSPA1A/HSPA1B | 294254    |
| HTR1B         | 25075     |
| HTR1F         | 60448     |
| HTR7          | 65032     |
| IFRD1         | 29596     |
| INHBA         | 29200     |
| JUNB          | 24517     |
| KCNA1         | 24520     |
| KCNB1         | 25736     |
| KCNK1         | 59324     |
| KCNV1         | 60326     |
| KLF10         | 81813     |
| LAMB3         | 305078    |
| LAMP5         | 362220    |
| LGI1          | 252892    |
| MCL1          | 60430     |
| METRNL        | 316842    |
| NAMPT         | 297508    |
| NGF           | 310738    |
| NPTX2         | 288475    |
| NTF3          | 81737     |
| PCDH19        | 317183    |
| PDP1          | 54705     |
| PLK2          | 83722     |
| PNPO          | 64533     |
| POLG          | 85472     |
| PRICKLE1      | 315259    |
| PRRT2         | 361651    |
| PTGS2         | 29527     |
| RGS16         | 360857    |
| RGS2          | 84583     |
| SCG2          | 24765     |
| SCN1A         | 81574     |
| SCN1B         | 29686     |
| SCN2A         | 24766     |
| SCN3B         | 245956    |
| SCN4A         | 25722     |
| SERTAD1       | 361526    |
| SLC2A3        | 25551     |
| SOCS3         | 89829     |
| SPNS2         | 100270678 |
| SPRY2         | 306141    |

|         |        |
|---------|--------|
| SSTR2   | 54305  |
| ST3GAL3 | 64445  |
| STRADA  | 303605 |
| SV2A    | 117559 |
| SV2C    | 29643  |
| TAC1    | 24806  |
| TEF     | 29362  |
| TRIB1   | 78969  |
| TRIM9   | 155812 |
| TRPC7   | 282822 |
| TWNK    | 309441 |
| TYRO3   | 25232  |

### Neuroinflammation list of WP+B and RX2+B reversal genes

| Symbol  | Log2 Fold Change |
|---------|------------------|
| KL      | -3.603           |
| MMP3    | -3.374           |
| GRIN2A  | -3.138           |
| IL6R    | -2.765           |
| TGFBR2  | -2.452           |
| PTGS2   | -2.32            |
| FGFR1   | -2.314           |
| IFNG    | -2.047           |
| ACVR1C  | -2.02            |
| KCNJ5   | -1.993           |
| GDNF    | -1.869           |
| NGF     | -1.851           |
| PLA2G4A | -1.756           |
| IRS2    | -1.745           |
| BDNF    | -1.537           |
| NFATC1  | -1.438           |
| JAK2    | -1.08            |
| CFLAR   | -1.05            |
| TGFB1   | -0.946           |
| GABRQ   | -0.916           |
| ACVR1   | -0.898           |
| PIK3CB  | -0.897           |
| MAP2K4  | -0.896           |
| AKT2    | -0.726           |
| CX3CL1  | -0.675           |
| JAK1    | -0.662           |
| SYK     | -0.526           |
| NCSTN   | 0.357            |
| FZD1    | 0.792            |
| PPP3CC  | 0.793            |
| IFNGR2  | 0.802            |
| PIK3C3  | 1.028            |
| GABRG2  | 1.162            |
| CD200   | 1.176            |
| MAPK3   | 1.215            |
| SNCA    | 1.292            |
| PSENEN  | 1.339            |
| GABRD   | 1.796            |
| PIK3CD  | 2.002            |
| IL34    | 2.079            |
| MAPK15  | 2.542            |
